# Supplementary material for: After-Ripening Induced Transcriptional Changes of Hormonal Genes in Wheat Seeds: The Cases of Brassinosteroids, Ethylene, Cytokinin and Salicylic Acid
Source: PLoS One. 2014 Jan 30;9(1):e87543. doi: 10.1371/journal.pone.0087543 (PMC3907488; doi:10.1371/journal.pone.0087543)
Supplement: Table S2 — Expression of brassinosteroid, ethylene, cytokinin and salicylic acid metabolism and signaling related probesets in dormant and after-ripened seeds. (XLSX) [file pone.0087543.s002.xlsx]

## Sheet: BR metabolism
Table S2. Changes in the expression of brassinosteroid metabolism related probesets between dormant and after-ripened seeds in both dry and imbibed states
		D-12/D-0			D-24/D-0			D-24/D-12			AR-12/AR-0			AR-24/AR-0			AR-24/AR-12			AR-0/D-0			AR-12/D-12			AR-24/D-24			AR-24/AR-24+ABA			Annotation
Gene	Probeset	Log2 FC	P-value	Linear FC	Log2 FC	P-value	Linear FC	Log2 FC	P-value	Linear FC	Log2 FC	P-value	Linear FC	Log2 FC	P-value	Linear FC	Log2 FC	P-value	Linear FC	Log2 FC	P-value	Linear FC	Log2 FC	P-value	Linear FC	Log2 FC	P-value	Linear FC	Log2 FC	P-value	Linear FC	UniProt Desc	Rice 6 Desc	Arab. Desc
DET	Ta.18512.1.S1_at	0.0214931	0.732876	1.01501	-0.164178	0.0587668	-1.12053	-0.185671	0.0367807	-1.13735	0.162118	0.30488	1.11893	-0.0641646	0.606576	-1.04548	-0.226283	0.0915793	-1.16982	-0.121414	0.342803	-1.0878	0.019211	0.854913	1.0134	-0.0214012	0.763016	-1.01494	-0.0501739	0.601242	-1.03539	Os04g0576800 protein n=5 Tax=Oryza sativa RepID=Q7XUH5_ORYSJ	protein 3-oxo-5-alpha-steroid 4-dehydrogenase, putative, expressed
DET	Ta.26954.1.S1_at	-0.0544048	0.602526	-1.03843	-0.215441	0.221865	-1.16106	-0.161037	0.236616	-1.11809	0.151223	0.196302	1.11051	0.0219046	0.911504	1.0153	-0.129318	0.525864	-1.09378	-0.134137	0.313937	-1.09744	0.0714909	0.378859	1.0508	0.103209	0.644397	1.07416	0.0223402	0.907812	1.01561	Os01g0150000 protein n=6 Tax=Poaceae RepID=Q5ZED1_ORYSJ	cDNA 3-oxo-5-alpha-steroid 4-dehydrogenase, putative, expressed	CER10; 3-oxo-5-alpha-steroid 4-dehydrogenase/ fatty acid elongase/ trans-2-enoyl-CoA reductase (NADPH)
DET	Ta.28682.1.S1_x_at	1.05507	1.09164e-05	2.07782	0.499531	0.00185722	1.41375	-0.555541	0.000899478	-1.46972	1.62052	0.00211723	3.07486	1.39364	0.00512339	2.62741	-0.226879	0.0965184	-1.1703	-0.0828962	0.737782	-1.05914	0.482553	6.61416e-05	1.39721	0.811214	0.00241875	1.75469	0.737482	0.00643644	1.66726	Os01g0150000 protein n=6 Tax=Poaceae RepID=Q5ZED1_ORYSJ	cDNA 3-oxo-5-alpha-steroid 4-dehydrogenase, putative, expressed	CER10; 3-oxo-5-alpha-steroid 4-dehydrogenase/ fatty acid elongase/ trans-2-enoyl-CoA reductase (NADPH)
DET	Ta.28682.2.S1_at	0.76119	0.000287722	1.69489	0.174095	0.04261	1.12826	-0.587095	0.000216834	-1.50222	1.00573	0.000610583	2.00796	0.856586	0.00267414	1.81075	-0.149145	0.175147	-1.10891	0.0156082	0.894698	1.01088	0.260148	0.00608203	1.1976	0.698099	0.00142596	1.62237	0.329195	0.0501865	1.25631	Glycoprotein-like n=1 Tax=Arabidopsis thaliana RepID=Q9M2U2_ARATH	cDNA 3-oxo-5-alpha-steroid 4-dehydrogenase, putative, expressed	CER10; 3-oxo-5-alpha-steroid 4-dehydrogenase/ fatty acid elongase/ trans-2-enoyl-CoA reductase (NADPH)
DET	Ta.28682.2.S1_x_at	0.957719	7.54187e-05	1.94224	0.397929	0.000443027	1.31761	-0.55979	0.000213919	-1.47405	1.19605	0.000625899	2.29112	1.14901	0.00107539	2.21762	-0.0470378	0.545042	-1.03314	0.0599902	0.65676	1.04246	0.298323	0.00471204	1.22971	0.811075	0.000238011	1.75452	0.510072	0.00450771	1.42412	Glycoprotein-like n=1 Tax=Arabidopsis thaliana RepID=Q9M2U2_ARATH	cDNA 3-oxo-5-alpha-steroid 4-dehydrogenase, putative, expressed	CER10; 3-oxo-5-alpha-steroid 4-dehydrogenase/ fatty acid elongase/ trans-2-enoyl-CoA reductase (NADPH)
DET	Ta.28682.3.S1_x_at	0.988436	0.000638682	1.98403	0.482781	0.00180453	1.39743	-0.505656	0.0112104	-1.41977	2.02133	1.02092e-05	4.05958	1.85105	0.000498487	3.60761	-0.170284	0.359218	-1.12528	-0.351828	0.0109681	-1.27618	0.681065	0.00226394	1.60332	1.01644	0.00429709	2.02292	0.547856	0.114487	1.46191	Os01g0150000 protein n=6 Tax=Poaceae RepID=Q5ZED1_ORYSJ	cDNA 3-oxo-5-alpha-steroid 4-dehydrogenase, putative, expressed	CER10; 3-oxo-5-alpha-steroid 4-dehydrogenase/ fatty acid elongase/ trans-2-enoyl-CoA reductase (NADPH)
DET	Ta.514.1.A1_at	0.325546	0.033098	1.25314	0.0364106	0.860444	1.02556	-0.289135	0.155822	-1.22191	-0.00149455	0.99023	-1.00104	-0.519239	0.00746004	-1.4332	-0.517745	0.0123526	-1.43172	0.114964	0.403267	1.08295	-0.212076	0.0816366	-1.15835	-0.440685	0.0732751	-1.35725	-0.00821404	0.92185	-1.00571	Putative uncharacterized protein Sb02g003510 n=1 Tax=Sorghum bicolor RepID=C5XA84_SORBI	cDNA 3-oxo-5-alpha-steroid 4-dehydrogenase, putative, expressed	3-oxo-5-alpha-steroid 4-dehydrogenase family protein / steroid 5-alpha-reductase family protein
DET	Ta.514.2.S1_s_at	0.196089	0.138991	1.14559	-0.329931	0.0117894	-1.25695	-0.526021	0.00303144	-1.43995	-0.204392	0.00156621	-1.1522	-0.689291	6.29419e-05	-1.61249	-0.484899	0.000422223	-1.39949	0.0976476	0.248676	1.07003	-0.302833	0.0212635	-1.23357	-0.261712	0.00412037	-1.1989	-0.119963	0.287771	-1.08671	Os07g0162100 protein n=2 Tax=Oryza sativa RepID=Q8H539_ORYSJ	cDNA 3-oxo-5-alpha-steroid 4-dehydrogenase, putative, expressed	3-oxo-5-alpha-steroid 4-dehydrogenase family protein / steroid 5-alpha-reductase family protein
DET	Ta.514.2.S1_x_at	-0.133734	0.0289963	-1.09713	-0.227196	0.0154206	-1.17056	-0.0934622	0.180626	-1.06693	-0.0191705	0.834626	-1.01338	-0.249884	0.0859122	-1.18911	-0.230713	0.0787665	-1.17342	-0.0536179	0.515066	-1.03786	0.0609454	0.352647	1.04315	-0.0763059	0.480211	-1.05431	-0.0555609	0.651964	-1.03926	Os07g0162100 protein n=2 Tax=Oryza sativa RepID=Q8H539_ORYSJ	cDNA 3-oxo-5-alpha-steroid 4-dehydrogenase, putative, expressed	3-oxo-5-alpha-steroid 4-dehydrogenase family protein / steroid 5-alpha-reductase family protein
DET	Ta.5674.1.S1_at	-0.160186	0.255289	-1.11743	-0.173279	0.192144	-1.12762	-0.0130931	0.921465	-1.00912	-0.285382	0.0386821	-1.21873	-0.595837	0.00485712	-1.51135	-0.310455	0.00920563	-1.2401	0.115429	0.376024	1.0833	-0.00976712	0.926813	-1.00679	-0.307129	0.0368005	-1.23724	-0.153492	0.148017	-1.11226	Os04g0576800 protein n=5 Tax=Oryza sativa RepID=Q7XUH5_ORYSJ	cDNA 3-oxo-5-alpha-steroid 4-dehydrogenase, putative, expressed	3-oxo-5-alpha-steroid 4-dehydrogenase family protein / steroid 5-alpha-reductase family protein
DET	TaAffx.105851.1.S1_s_at	-0.0627153	0.731882	-1.04443	-0.880683	0.0147937	-1.84125	-0.817968	0.0328957	-1.76292	0.513272	0.007371	1.42728	-0.238051	0.0955512	-1.1794	-0.751323	0.00172366	-1.68334	-0.559472	0.00601382	-1.47373	0.0165155	0.926775	1.01151	0.0831607	0.720711	1.05934	-0.159954	0.500825	-1.11725	Os04g0576800 protein n=5 Tax=Oryza sativa RepID=Q7XUH5_ORYSJ	cDNA 3-oxo-5-alpha-steroid 4-dehydrogenase, putative, expressed	3-oxo-5-alpha-steroid 4-dehydrogenase family protein / steroid 5-alpha-reductase family protein
CYP90B1(DWF4)	Ta.27570.1.S1_at	1.77146	3.9477e-05	3.41399	0.411094	0.00607047	1.32969	-1.36037	0.000115753	-2.5675	2.74659	1.11813e-06	6.71128	0.96894	0.0011199	1.9574	-1.77765	7.94797e-05	-3.42867	0.278602	0.0196329	1.21302	1.25373	8.28457e-05	2.38457	0.836448	0.00210626	1.78565	0.0112644	0.924039	1.00784	Putative steroid 22-alpha-hydroxylase n=1 Tax=Oryza sativa Japonica Group RepID=Q8H848_ORYSJ	cDNA cytochrome P450, putative, expressed	DWF4 (DWARF 4); steroid 22-alpha hydroxylase
CYP90A1(CPD)	Ta.4986.1.S1_at	-1.02804	3.2921e-06	-2.03926	-0.792767	0.00292515	-1.73239	0.235277	0.131064	1.17713	-1.34558	1.60489e-06	-2.54132	-1.70713	6.12911e-05	-3.26512	-0.361558	0.0186785	-1.28481	0.082295	0.0500385	1.0587	-0.235237	0.00126383	-1.1771	-0.832072	0.00559136	-1.78024	-0.269835	0.184029	-1.20567	CPD brassinosteroid C-23 hydroxylase n=1 Tax=Hordeum vulgare subsp. vulgare RepID=B1PZ14_HORVD	cDNA cytochrome P450, putative, expressed	CPD (CONSTITUTIVE PHOTOMORPHOGENIC DWARF); electron carrier/ heme binding / iron ion binding / monooxygenase/ oxygen binding
CYP90D1(ROT3)	TaAffx.88122.1.S1_s_at	0.796425	0.00823322	1.73679	0.192641	0.44012	1.14285	-0.603784	0.0217686	-1.5197	0.652509	0.00578034	1.5719	0.502213	0.0608467	1.41638	-0.150297	0.432583	-1.1098	0.269935	0.229746	1.20575	0.12602	0.153898	1.09128	0.579507	0.0637969	1.49434	0.0678625	0.723647	1.04816	Brassinosteroid C-3 oxidase n=1 Tax=Hordeum vulgare subsp. vulgare RepID=A0MNY8_HORVD	cDNA cytochrome P450, putative, expressed	CYP90D1; oxidoreductase, acting on paired donors, with incorporation or reduction of molecular oxygen, NADH or NADPH as one donor
CYP90D1(ROT3)	TaAffx.88122.2.S1_at	0.206049	0.0950158	1.15352	0.0596443	0.355737	1.04221	-0.146405	0.192872	-1.10681	-0.0743629	0.623186	-1.0529	-0.199983	0.0287398	-1.14868	-0.12562	0.444357	-1.09098	0.299767	0.00340518	1.23095	0.0193553	0.910586	1.01351	0.0401403	0.582701	1.02821	-0.0503001	0.581293	-1.03548	Brassinosteroid C-3 oxidase n=1 Tax=Hordeum vulgare subsp. vulgare RepID=A0MNY8_HORVD	cDNA cytochrome P450, putative, expressed	CYP90D1; oxidoreductase, acting on paired donors, with incorporation or reduction of molecular oxygen, NADH or NADPH as one donor
CYP90D1(ROT3)	TaAffx.88122.3.S1_at	0.374418	0.00757872	1.29632	-0.467864	0.033815	-1.38306	-0.842282	0.00275866	-1.79288	0.540093	0.0239683	1.45407	0.0635759	0.796543	1.04505	-0.476517	0.0538418	-1.39138	-0.171596	0.364903	-1.1263	-0.00592062	0.828814	-1.00411	0.359844	0.171433	1.28329	0.169531	0.45809	1.12469	Brassinosteroid C-3 oxidase n=1 Tax=Hordeum vulgare subsp. vulgare RepID=A0MNY8_HORVD	cDNA cytochrome P450, putative, expressed	CYP90D1; oxidoreductase, acting on paired donors, with incorporation or reduction of molecular oxygen, NADH or NADPH as one donor
GA vs. BR interaction related probesets
GSR	TaAffx.30319.1.S1_at	-0.478891	0.00293935	-1.39367	-0.327902	0.0254013	-1.25519	0.150989	0.100304	1.11033	-0.524831	0.0210051	-1.43877	-0.220745	0.179182	-1.16534	0.304086	0.00799653	1.23464	-0.00692573	0.965052	-1.00481	-0.0528655	0.429697	-1.03732	0.100232	0.238344	1.07195	0.144145	0.24515	1.10508	GAST1 protein n=6 Tax=Zea mays RepID=B6U6R4_MAIZE	cDNA GASR7 - Gibberellin-regulated GASA/GAST/Snakin family protein precursor, expressed	Encodes a Gibberellin-regulated GASA/GAST/Snakin family protein
GSR	Ta.2927.1.S1_s_at	0.780023	0.00982822	1.71716	0.740563	0.0617192	1.67083	-0.0394601	0.905304	-1.02773	1.09328	0.129568	2.13359	2.21715	0.0179411	4.64975	1.12387	0.00207663	2.17931	0.489935	0.437372	1.40438	0.803192	0.0125926	1.74496	1.96652	0.00264465	3.90825	0.560604	0.0476914	1.47489	GA-induced protein n=1 Tax=Triticum aestivum RepID=B8PS17_WHEAT	cDNA GASR7 - Gibberellin-regulated GASA/GAST/Snakin family protein precursor, expressed	GASA5 (GAST1 PROTEIN HOMOLOG 5)
GSR	Ta.338.1.S1_at	1.95569	0.000166938	3.87902	1.08503	0.00131563	2.12142	-0.870659	0.00415313	-1.8285	4.38242	2.16842e-06	20.8565	4.94039	6.39078e-06	30.7046	0.55796	0.010462	1.47219	-0.378541	0.0530975	-1.30003	2.04819	5.39563e-05	4.13588	3.47681	2.37572e-05	11.1333	-0.181856	0.35914	-1.13434	GA-induced protein n=1 Tax=Triticum aestivum RepID=B8PS17_WHEAT	cDNA GASR7 - Gibberellin-regulated GASA/GAST/Snakin family protein precursor, expressed	GASA5 (GAST1 PROTEIN HOMOLOG 5)
GSR	Ta.14043.1.S1_at	0.560248	0.00348323	1.47452	0.234193	0.188369	1.17625	-0.326055	0.090215	-1.25358	2.4714	8.36958e-05	5.5458	4.44242	2.37265e-05	21.7421	1.97102	0.000947682	3.92046	-0.043293	0.689087	-1.03046	1.86786	0.000212832	3.6499	4.16493	5.13522e-05	17.9378	0.547235	0.05056	1.46128	GA-induced protein n=1 Tax=Triticum aestivum RepID=B8PS17_WHEAT	cDNA GASR7 - Gibberellin-regulated GASA/GAST/Snakin family protein precursor, expressed	GASA5 (GAST1 PROTEIN HOMOLOG 5)
GSR	TaAffx.121065.1.S1_at	-0.448479	0.00556334	-1.3646	-0.352914	0.0284246	-1.27714	0.0955653	0.22262	1.06848	-0.354967	0.0012195	-1.27896	-0.0786855	0.290167	-1.05605	0.276282	0.0130347	1.21107	-0.246287	0.0482111	-1.18615	-0.152775	0.00884012	-1.11171	0.0279413	0.764115	1.01956	-0.045351	0.616143	-1.03193	GA-induced protein n=1 Tax=Triticum aestivum RepID=B8PS17_WHEAT	cDNA GASR7 - Gibberellin-regulated GASA/GAST/Snakin family protein precursor, expressed	GASA5 (GAST1 PROTEIN HOMOLOG 5)
GSR	Ta.338.2.S1_at	-0.278485	0.13714	-1.21292	-0.180677	0.479756	-1.13342	0.0978084	0.627768	1.07015	-0.0910622	0.708197	-1.06515	-0.212294	0.453639	-1.15853	-0.121231	0.378612	-1.08766	-0.101188	0.724731	-1.07266	0.0862354	0.133997	1.0616	-0.132804	0.576003	-1.09642	-0.188731	0.290189	-1.13976	GA-induced protein n=1 Tax=Triticum aestivum RepID=B8PS17_WHEAT	cDNA GASR7 - Gibberellin-regulated GASA/GAST/Snakin family protein precursor, expressed	gibberellin-responsive protein, putative

## Sheet: BR signalling
Table S2. Changes in the expression of brassinosteroid signaling related probesets between dormant and after-ripened seeds in both dry and imbibed states
		D-12/D-0			D-24/D-0			D-24/D-12			AR-12/AR-0			AR-24/AR-0			AR-24/AR-12			AR-0/D-0			AR-12/D-12			AR-24/D-24			AR-24/AR-24+ABA			Annotation
Gene	Probeset	Log2 FC	P-value	Linear FC	Log2 FC	P-value	Linear FC	Log2 FC	P-value	Linear FC	Log2 FC	P-value	Linear FC	Log2 FC	P-value	Linear FC	Log2 FC	P-value	Linear FC	Log2 FC	P-value	Linear FC	Log2 FC	P-value	Linear FC	Log2 FC	P-value	Linear FC	Log2 FC	P-value	Linear FC	UniProt Desc	Rice 6 Desc	Arab. Desc
RAV	TaAffx.35357.1.S1_at	0.246001	0.00397123	1.18592	0.154008	0.0785617	1.11266	-0.0919928	0.186065	-1.06584	0.030075	0.784082	1.02106	0.186115	0.333588	1.1377	0.15604	0.323078	1.11422	-0.0989763	0.405476	-1.07101	-0.314902	0.000451384	-1.24393	-0.0668697	0.673	-1.04744	-0.0215935	0.888143	-1.01508	AP2/ERF and B3 domain-containing protein Os01g0693400 n=1 Tax=Oryza sativa Japonica Group RepID=Y1934_ORYSJ	cDNA B3 DNA binding domain containing protein, expressed	RAV2 (REGULATOR OF THE ATPASE OF THE VACUOLAR MEMBRANE); DNA binding / transcription factor/ transcription repressor
RAV	Ta.27316.1.S1_at	0.561386	0.0136933	1.47569	0.434265	0.034298	1.35122	-0.127121	0.322193	-1.09211	0.975918	0.0120263	1.96689	0.540283	0.0220023	1.45426	-0.435635	0.115849	-1.35251	-0.00075071	0.996396	-1.00052	0.413781	0.118166	1.33217	0.105267	0.459406	1.07569	-0.209817	0.166441	-1.15654	Putative uncharacterized protein n=1 Tax=Zea mays RepID=B4FXX4_MAIZE	cDNA B3 DNA binding domain containing protein, expressed	RAV2 (REGULATOR OF THE ATPASE OF THE VACUOLAR MEMBRANE); DNA binding / transcription factor/ transcription repressor
RAV	Ta.21035.1.S1_at	0.616815	0.0345263	1.53349	0.498785	0.00447245	1.41302	-0.118031	0.559006	-1.08525	2.08121	0.000199617	4.23163	1.71064	0.0038812	3.27305	-0.370577	0.268432	-1.29287	0.254945	0.12583	1.19329	1.71934	0.00133394	3.29287	1.4668	0.00535009	2.76408	0.202882	0.494233	1.151	Putative uncharacterized protein Sb03g006590 n=1 Tax=Sorghum bicolor RepID=C5XQN8_SORBI	cDNA B3 DNA binding domain containing protein, expressed	RAV2 (REGULATOR OF THE ATPASE OF THE VACUOLAR MEMBRANE); DNA binding / transcription factor/ transcription repressor
RAV	Ta.27043.1.S1_at	0.497623	0.00609363	1.41189	0.0479125	0.717822	1.03377	-0.44971	0.0172124	-1.36577	0.485974	0.0326616	1.40053	-0.0167216	0.889405	-1.01166	-0.502696	0.0237737	-1.41686	0.233718	0.112583	1.17586	0.222069	0.177697	1.1664	0.169084	0.235639	1.12434	0.0237657	0.77165	1.01661	Putative uncharacterized protein Sb03g006590 n=1 Tax=Sorghum bicolor RepID=C5XQN8_SORBI	cDNA B3 DNA binding domain containing protein, expressed	RAV2 (REGULATOR OF THE ATPASE OF THE VACUOLAR MEMBRANE); DNA binding / transcription factor/ transcription repressor
BRI	TaAffx.86419.1.S1_at	0.50879	0.0297028	1.42286	-0.249627	0.100248	-1.1889	-0.758417	0.00216261	-1.69163	0.616273	0.00168706	1.53291	-0.0623807	0.801494	-1.04419	-0.678653	0.0444192	-1.60065	-0.134648	0.342926	-1.09783	-0.0271659	0.83372	-1.01901	0.0525979	0.82885	1.03713	0.0842133	0.766404	1.06011	Brassinosteroid-insensitive 1 n=4 Tax=Triticeae RepID=Q0ZA03_WHEAT	cDNA systemin receptor SR160 precursor, putative, expressed	BRI1 (BRASSINOSTEROID INSENSITIVE 1); kinase/ protein binding / protein heterodimerization/ protein homodimerization/ protein k
BRI	Ta.9744.1.S1_at	2.39207	4.99897e-05	5.2491	2.17198	7.47619e-05	4.50642	-0.220091	0.155895	-1.16481	2.27373	7.93731e-05	4.83573	2.3484	6.8323e-05	5.09258	0.0746623	0.250118	1.05312	0.0397215	0.81821	1.02791	-0.0786157	0.465455	-1.056	0.216137	0.090582	1.16162	0.434223	0.00136899	1.35118	Brassinosteroid-insensitive 1 n=4 Tax=Triticeae RepID=Q0ZA03_WHEAT	cDNA systemin receptor SR160 precursor, putative, expressed	BRI1 (BRASSINOSTEROID INSENSITIVE 1); kinase/ protein binding / protein heterodimerization/ protein homodimerization/ protein k
BRI	Ta.18587.1.S1_at	0.354554	0.076628	1.27859	-0.0866464	0.804695	-1.0619	-0.441201	0.220864	-1.35773	-0.675585	0.161283	-1.59725	-1.21386	0.0452194	-2.31957	-0.538275	0.0330327	-1.45223	0.735746	0.14984	1.66526	-0.294393	0.0206359	-1.22637	-0.391467	0.312176	-1.31173	-0.231293	0.26718	-1.17389	Putative uncharacterized protein Sb02g019470 n=1 Tax=Sorghum bicolor RepID=C5X896_SORBI	cDNA serine/threonine-protein kinase BRI1-like 1 precursor, putative, expressed	BRL3 (BRI1-LIKE 3); ATP binding / protein binding / protein kinase/ protein serine/threonine kinase
BRI	Ta.18587.1.S1_x_at	0.300048	0.111899	1.23119	-0.0920097	0.77724	-1.06585	-0.392058	0.247271	-1.31226	-0.502814	0.174351	-1.41697	-0.908838	0.0484298	-1.87753	-0.406024	0.049193	-1.32503	0.542501	0.166915	1.4565	-0.260361	0.0701529	-1.19778	-0.274327	0.420961	-1.20943	-0.205349	0.231143	-1.15297	Putative uncharacterized protein Sb02g019470 n=1 Tax=Sorghum bicolor RepID=C5X896_SORBI	cDNA serine/threonine-protein kinase BRI1-like 1 precursor, putative, expressed	BRL3 (BRI1-LIKE 3); ATP binding / protein binding / protein kinase/ protein serine/threonine kinase
BAK	Ta.4776.1.A1_a_at	1.08618	0.00105692	2.12311	1.05223	0.00270926	2.07374	-0.0339471	0.81401	-1.02381	0.689885	0.000827218	1.61315	1.1002	0.000254433	2.14384	0.410315	0.00889074	1.32898	0.632874	0.00661742	1.55065	0.236579	0.0499441	1.1782	0.680842	0.00740793	1.60308	0.633228	0.00199432	1.55103	BRI1-associated receptor kinase 1 protein n=2 Tax=Triticeae RepID=B2ZPK4_WHEAT	cDNA BRASSINOSTEROID INSENSITIVE 1-associated receptor kinase 1 precursor, putative, expressed	SERK2 (SOMATIC EMBRYOGENESIS RECEPTOR-LIKE KINASE 2); kinase
BAK	Ta.4776.2.A1_at	0.719803	0.00212971	1.64696	-0.0141622	0.879379	-1.00987	-0.733965	0.00360316	-1.6632	0.891179	1.18026e-06	1.85469	0.0959968	0.243776	1.0688	-0.795183	0.000316788	-1.7353	-0.0427849	0.40838	-1.0301	0.128592	0.238162	1.09323	0.0673741	0.546059	1.04781	0.114938	0.483149	1.08293	BRI1-associated receptor kinase 1 protein n=2 Tax=Triticeae RepID=B2ZPK4_WHEAT	cDNA BRASSINOSTEROID INSENSITIVE 1-associated receptor kinase 1 precursor, putative, expressed	SERK2 (SOMATIC EMBRYOGENESIS RECEPTOR-LIKE KINASE 2); kinase
BAK	Ta.4776.1.A1_x_at	0.538386	0.00833616	1.45235	0.60857	0.000660064	1.52475	0.0701836	0.524987	1.04985	0.60491	0.00561252	1.52088	0.738708	0.0228129	1.66868	0.133798	0.526045	1.09718	0.183078	0.167078	1.1353	0.249602	0.0935954	1.18888	0.313217	0.166548	1.24247	0.492649	0.0596151	1.40703	Os08g0174700 protein n=4 Tax=Poaceae RepID=Q6Z4U4_ORYSJ	cDNA BRASSINOSTEROID INSENSITIVE 1-associated receptor kinase 1 precursor, putative, expressed	SERK2 (SOMATIC EMBRYOGENESIS RECEPTOR-LIKE KINASE 2); kinase
BAK	Ta.6832.1.S1_at	1.70317	0.00160344	3.25616	1.36463	0.00125086	2.5751	-0.33854	0.178071	-1.26448	1.61095	1.51513e-05	3.05453	1.2752	0.000100087	2.42032	-0.335751	0.00718668	-1.26203	0.70443	0.00820855	1.6295	0.612209	0.0285471	1.5286	0.614998	0.00658386	1.53155	0.250369	0.119348	1.18951	Somatic embryogenesis receptor-like kinase 2 n=6 Tax=Andropogoneae RepID=Q94IJ4_MAIZE	cDNA BRASSINOSTEROID INSENSITIVE 1-associated receptor kinase 1 precursor, putative, expressed	SERK1 (SOMATIC EMBRYOGENESIS RECEPTOR-LIKE KINASE 1); kinase/ transmembrane receptor protein serine/threonine kinase
BAK	Ta.9317.1.A1_at	-0.229721	0.256239	-1.17261	0.494822	0.0369146	1.40915	0.724543	0.0108689	1.65238	0.245159	0.282281	1.18522	1.25887	0.0129048	2.39308	1.01371	0.0189276	2.01909	-0.221962	0.342021	-1.16632	0.252919	0.196362	1.19162	0.542082	0.109979	1.45607	0.173995	0.533938	1.12818	BRASSINOSTEROID INSENSITIVE 1-associated receptor kinase 1, putative, expressed n=3 Tax=Oryza sativa RepID=Q2R1F3_ORYSJ	cDNA BRASSINOSTEROID INSENSITIVE 1-associated receptor kinase 1 precursor, putative, expressed	leucine-rich repeat family protein / protein kinase family protein
BAK	TaAffx.110793.1.S1_at	-0.0408764	0.825492	-1.02874	-0.199828	0.215838	-1.14856	-0.158952	0.229477	-1.11648	-0.0491162	0.788288	-1.03463	-0.198946	0.319371	-1.14786	-0.149829	0.295123	-1.10944	-0.0150885	0.943669	-1.01051	-0.0233283	0.874369	-1.0163	-0.0142059	0.887687	-1.00989	-0.235254	0.137635	-1.17711	BRASSINOSTEROID INSENSITIVE 1-associated receptor kinase 1, putative, expressed n=3 Tax=Oryza sativa RepID=Q2R1F3_ORYSJ	cDNA BRASSINOSTEROID INSENSITIVE 1-associated receptor kinase 1 precursor, putative, expressed	leucine-rich repeat family protein / protein kinase family protein
BAK	Ta.5488.1.A1_at	0.416276	0.0587896	1.33448	0.861508	0.00470074	1.81694	0.445231	0.0330717	1.36153	1.01929	0.00306139	2.02693	1.08214	0.00244475	2.11717	0.0628424	0.467291	1.04452	-0.0409587	0.841028	-1.0288	0.562059	0.00893465	1.47637	0.17967	0.170444	1.13262	-0.0763988	0.411336	-1.05438	Putative uncharacterized protein n=2 Tax=Oryza sativa RepID=B9F2H8_ORYSJ	cDNA BRASSINOSTEROID INSENSITIVE 1-associated receptor kinase 1 precursor, putative, expressed	NIK1 (NSP-INTERACTING KINASE 1); kinase
BAK	Ta.4209.1.A1_at	0.640041	0.0102009	1.55837	0.197952	0.189729	1.14707	-0.44209	0.00259485	-1.35857	0.661862	4.09243e-05	1.58212	0.21925	0.0673014	1.16413	-0.442613	0.00613727	-1.35906	0.0471381	0.731486	1.03321	0.0689591	0.352269	1.04896	0.0684364	0.461443	1.04858	0.137028	0.292542	1.09964	Putative uncharacterized protein n=4 Tax=Poaceae RepID=Q5VQL9_ORYSJ	cDNA BRASSINOSTEROID INSENSITIVE 1-associated receptor kinase 1 precursor, putative, expressed	NIK2 (NSP-INTERACTING KINASE 2); ATP binding / protein binding / protein kinase/ protein serine/threonine kinase
BAK	TaAffx.123487.1.S1_at	1.17581	0.00639472	2.2592	0.133862	0.55134	1.09723	-1.04195	0.000713408	-2.059	1.52571	0.000112934	2.87928	0.656363	0.00629536	1.57611	-0.869343	0.00118938	-1.82683	-0.198028	0.416021	-1.14713	0.151868	0.255228	1.11101	0.324473	0.0332153	1.25221	0.404121	0.0655119	1.32328	Putative uncharacterized protein n=4 Tax=Poaceae RepID=Q5VQL9_ORYSJ	cDNA BRASSINOSTEROID INSENSITIVE 1-associated receptor kinase 1 precursor, putative, expressed	NIK3 (NSP-INTERACTING KINASE 3); kinase
BAK	Ta.12817.1.S1_at	1.16014	0.000236346	2.2348	0.782826	0.00241716	1.7205	-0.377316	0.0338082	-1.29892	1.01476	0.000295098	2.02057	0.606071	0.0160693	1.52211	-0.408694	0.0612895	-1.32748	0.369376	0.00999442	1.29179	0.223999	0.084071	1.16797	0.192621	0.325921	1.14284	-0.079684	0.656695	-1.05679	Os04g0457800 protein n=4 Tax=Oryza sativa RepID=Q7XV05_ORYSJ	cDNA BRASSINOSTEROID INSENSITIVE 1-associated receptor kinase 1 precursor, putative, expressed	SERK2 (SOMATIC EMBRYOGENESIS RECEPTOR-LIKE KINASE 2); kinase
BAK	TaAffx.83041.1.S1_x_at	1.20138	0.00242666	2.2996	-0.0156488	0.931184	-1.01091	-1.21703	1.69488e-05	-2.32468	1.06754	4.55017e-05	2.09585	0.247778	0.00583689	1.18738	-0.81976	0.000160427	-1.76511	-0.158222	0.410333	-1.11591	-0.292066	0.0125527	-1.22439	0.105205	0.050489	1.07565	0.0450916	0.779214	1.03175	Somatic embryogenesis receptor kinase-1 n=4 Tax=Andropogoneae RepID=C7EP41_9POAL	cDNA BRASSINOSTEROID INSENSITIVE 1-associated receptor kinase 1 precursor, putative, expressed	SERK2 (SOMATIC EMBRYOGENESIS RECEPTOR-LIKE KINASE 2); kinase
BAK	TaAffx.24817.1.S1_at	0.700895	0.000799107	1.62551	-0.0926574	0.561464	-1.06633	-0.793552	0.00579834	-1.73334	0.624251	0.00132561	1.54141	-0.214467	0.0981507	-1.16027	-0.838718	0.000217554	-1.78846	0.0604644	0.550832	1.0428	-0.0161801	0.793659	-1.01128	-0.0613455	0.705291	-1.04344	0.049137	0.508973	1.03465	Os04g0457800 protein n=4 Tax=Oryza sativa RepID=Q7XV05_ORYSJ	cDNA BRASSINOSTEROID INSENSITIVE 1-associated receptor kinase 1 precursor, putative, expressed	BRK1 (BRI1-ASSOCIATED RECEPTOR KINASE); kinase/ protein binding / protein heterodimerization/ protein serine/threonine kinase
BSK	TaAffx.83835.1.S1_at	0.323463	0.375159	1.25133	-0.895787	0.0580879	-1.86062	-1.21925	0.000731689	-2.32826	1.50473	0.00107624	2.83771	0.258178	0.508119	1.19597	-1.24655	0.0162152	-2.37273	-0.849878	0.0797908	-1.80235	0.331386	0.00791885	1.25822	0.304087	0.410967	1.23464	0.226062	0.534813	1.16964	Protein kinase-like protein n=3 Tax=Oryza sativa RepID=Q9FWF0_ORYSA	cDNA protein kinase family protein, putative, expressed	BSK1 (BR-SIGNALING KINASE 1); ATP binding / binding / kinase/ protein kinase/ protein tyrosine kinase
BSK	Ta.27792.1.S1_at	-0.0307158	0.803209	-1.02152	-0.693822	0.00501673	-1.61756	-0.663106	0.000312251	-1.58349	0.401738	0.0368172	1.3211	-0.23273	0.335955	-1.17506	-0.634467	0.0223431	-1.55236	-0.120365	0.515565	-1.08701	0.312088	0.00170793	1.2415	0.340727	0.13049	1.26639	-0.177663	0.381145	-1.13105	Protein kinase-like protein n=3 Tax=Oryza sativa RepID=Q9FWF0_ORYSA	cDNA protein kinase family protein, putative, expressed	BSK1 (BR-SIGNALING KINASE 1); ATP binding / binding / kinase/ protein kinase/ protein tyrosine kinase
BSK	TaAffx.114075.1.S1_s_at	0.902918	1.47058e-05	1.86984	0.826381	4.07892e-05	1.77323	-0.0765365	0.139029	-1.05448	0.55376	0.0417862	1.46791	0.168479	0.429333	1.12387	-0.385281	0.0026613	-1.30611	0.167347	0.421357	1.12299	-0.181811	0.00888536	-1.13431	-0.490555	0.00123647	-1.40499	0.0681779	0.453769	1.04839	Os03g0132800 protein n=3 Tax=Oryza sativa RepID=Q10S67_ORYSJ	cDNA protein kinase family protein, putative, expressed	BSK1 (BR-SIGNALING KINASE 1); ATP binding / binding / kinase/ protein kinase/ protein tyrosine kinase
BSK	TaAffx.114075.2.S1_s_at	1.46685	0.000952005	2.76417	0.42963	0.0864261	1.34689	-1.03722	0.000786247	-2.05226	1.97058	0.00130666	3.91926	0.596414	0.222321	1.51195	-1.37417	0.0151083	-2.59218	-0.611242	0.103323	-1.52757	-0.107507	0.166506	-1.07736	-0.444458	0.272529	-1.3608	0.58632	0.266684	1.50141	Os03g0132800 protein n=3 Tax=Oryza sativa RepID=Q10S67_ORYSJ	cDNA protein kinase family protein, putative, expressed	BSK1 (BR-SIGNALING KINASE 1); ATP binding / binding / kinase/ protein kinase/ protein tyrosine kinase
BSK	Ta.25464.1.S1_at	0.396215	0.0102844	1.31605	0.279483	0.0375776	1.21376	-0.116731	0.284359	-1.08428	0.384764	0.00044908	1.30565	1.42326	2.94331e-06	2.6819	1.03849	2.30732e-06	2.05408	0.234468	0.0249853	1.17647	0.223017	0.0277254	1.16717	1.37824	4.50701e-05	2.59951	1.23194	0.000726902	2.34883	Os10g0571300 protein n=3 Tax=Poaceae RepID=Q8S7N5_ORYSJ	cDNA protein kinase family protein, putative, expressed	BSK2 (BR-SIGNALING KINASE 2); ATP binding / binding / kinase/ protein kinase/ protein tyrosine kinase
BSU	Ta.9206.1.S1_at	0.531976	0.0225891	1.44591	0.0286181	0.759752	1.02004	-0.503358	0.0148667	-1.41751	0.169221	0.0174114	1.12445	-0.427707	0.0237716	-1.34509	-0.596928	0.00770183	-1.51249	0.577571	0.0030278	1.49233	0.214816	0.159662	1.16056	0.121246	0.364145	1.08767	0.0338792	0.818998	1.02376	Serine/threonine protein phosphatase n=3 Tax=Magnoliophyta RepID=B9FA13_ORYSJ	cDNA serine/threonine protein phosphatase, putative, expressed	kelch repeat-containing serine/threonine phosphoesterase family protein
BSU	Ta.20742.1.S1_a_at	1.30258	0.00391478	2.46669	0.95505	0.00220631	1.93865	-0.347528	0.150688	-1.27238	1.1071	0.00257522	2.15412	-0.129283	0.479916	-1.09375	-1.23638	4.14885e-06	-2.35607	0.374491	0.136713	1.29638	0.179013	0.386514	1.13211	-0.709842	0.000702268	-1.63563	-0.00254337	0.976389	-1.00177	Serine/threonine protein phosphatase BSL1 homolog n=4 Tax=Poaceae RepID=BSL1_ORYSJ	cDNA serine/threonine protein phosphatase, putative, expressed	kelch repeat-containing serine/threonine phosphoesterase family protein
BSU	Ta.20742.1.S1_at	1.32302	0.00212061	2.50189	1.12096	0.00148951	2.17492	-0.202052	0.387855	-1.15033	1.08996	0.00285985	2.12868	-0.0701402	0.75122	-1.04982	-1.1601	0.000727091	-2.23473	0.486299	0.0573337	1.40085	0.253243	0.212664	1.19188	-0.704806	0.0149924	-1.62993	-0.192993	0.276569	-1.14313	Serine/threonine protein phosphatase BSL1 homolog n=4 Tax=Poaceae RepID=BSL1_ORYSJ	cDNA serine/threonine protein phosphatase, putative, expressed	kelch repeat-containing serine/threonine phosphoesterase family protein
BSU	TaAffx.85764.1.S1_at	0.126162	0.439098	1.09139	-0.380306	0.0404018	-1.30162	-0.506468	0.00271377	-1.42057	0.307509	0.0186922	1.23757	-0.257806	0.0148333	-1.19566	-0.565315	0.000394061	-1.47971	-0.17044	0.292888	-1.1254	0.0109067	0.910079	1.00759	-0.04794	0.0516292	-1.03379	0.0393378	0.720682	1.02764	Serine/threonine protein phosphatase n=2 Tax=Zea mays RepID=B4FCK7_MAIZE	cDNA serine/threonine-protein phosphatase BSL2, putative, expressed	kelch repeat-containing serine/threonine phosphoesterase family protein
BIN	Ta.9422.2.S1_a_at	-0.653015	0.147733	-1.57245	-0.622213	0.151002	-1.53923	0.0308019	0.85342	1.02158	0.0010963	0.986808	1.00076	-0.162946	0.584307	-1.11957	-0.164042	0.573091	-1.12042	-0.54092	0.192771	-1.4549	0.113191	0.437135	1.08162	-0.0816526	0.785677	-1.05823	0.863575	0.048847	1.81954	Os01g0205700 protein (Fragment) n=1 Tax=Oryza sativa Japonica Group RepID=Q0JPS3_ORYSJ	cDNA CGMC_GSK.2 - CGMC includes CDA, MAPK, GSK3, and CLKC kinases, expressed	GSK1 (GSK3/SHAGGY-LIKE PROTEIN KINASE 1); glycogen synthase kinase 3/ kinase
BIN	Ta.9422.3.S1_a_at	-0.701409	0.085454	-1.62609	-0.648371	0.0854637	-1.5674	0.053038	0.7153	1.03745	-0.360017	0.00279656	-1.28344	-0.536248	0.0334188	-1.4502	-0.176231	0.344473	-1.12993	-0.240324	0.44674	-1.18126	0.101067	0.480966	1.07257	-0.128202	0.489627	-1.09293	0.506729	0.0540239	1.42083	Os01g0205700 protein (Fragment) n=1 Tax=Oryza sativa Japonica Group RepID=Q0JPS3_ORYSJ	cDNA CGMC_GSK.2 - CGMC includes CDA, MAPK, GSK3, and CLKC kinases, expressed	GSK1 (GSK3/SHAGGY-LIKE PROTEIN KINASE 1); glycogen synthase kinase 3/ kinase
BIN	Ta.20401.1.S1_at	-0.129783	0.656151	-1.09413	-0.688798	0.0546873	-1.61194	-0.559015	0.00608365	-1.47326	0.811247	0.000270959	1.75473	0.384494	0.202462	1.3054	-0.426754	0.158906	-1.34421	-0.319281	0.28622	-1.24771	0.621749	0.00349445	1.53874	0.754011	0.0387722	1.68647	0.59829	0.100082	1.51392	Os01g0252100 protein n=7 Tax=Poaceae RepID=Q9LIS6_ORYSJ	cDNA CGMC_GSK.1 - CGMC includes CDA, MAPK, GSK3, and CLKC kinases, expressed	ATSK11; protein kinase/ protein serine/threonine kinase
BIN	Ta.3003.1.S1_x_at	0.157236	0.0120214	1.11515	0.090661	0.131742	1.06486	-0.0665754	0.28725	-1.04723	-0.0292093	0.860416	-1.02045	-0.0363288	0.861136	-1.0255	-0.00711941	0.959987	-1.00495	0.0258545	0.871648	1.01808	-0.160591	0.0433287	-1.11774	-0.101135	0.489533	-1.07262	0.53528	0.0177698	1.44922	Shaggy-related protein kinase gamma n=5 Tax=rosids RepID=KSG3_ARATH	cDNA CGMC_GSK.1 - CGMC includes CDA, MAPK, GSK3, and CLKC kinases, expressed	ATSK11; protein kinase/ protein serine/threonine kinase
BIN	Ta.13447.1.S1_at	1.0109	0.0116736	2.01517	0.899722	0.00637425	1.86571	-0.111182	0.541405	-1.08011	1.7486	8.94068e-05	3.36031	1.06985	0.00218353	2.09922	-0.678745	0.00375222	-1.60075	-0.096977	0.647486	-1.06953	0.640715	0.0165848	1.5591	0.0731515	0.573455	1.05201	0.273236	0.0978325	1.20852	Glycogen synthase kinase n=11 Tax=Poaceae RepID=Q1AMT7_ORYSJ	cDNA CGMC_GSK.6 - CGMC includes CDA, MAPK, GSK3, and CLKC kinases, expressed	ATSK12; protein kinase/ protein serine/threonine kinase
BIN	Ta.3019.1.S1_at	-0.152763	0.0946954	-1.1117	-0.0990579	0.280998	-1.07107	0.0537054	0.601606	1.03793	-0.169977	0.0455463	-1.12504	-0.179058	0.0426773	-1.13214	-0.0090815	0.825702	-1.00632	-0.0547798	0.434748	-1.0387	-0.0719935	0.340261	-1.05117	-0.13478	0.158539	-1.09793	0.340252	0.0137333	1.26598	Os05g0207500 protein n=2 Tax=Oryza sativa Japonica Group RepID=Q60EZ2_ORYSJ	cDNA CGMC_GSK.7 - CGMC includes CDA, MAPK, GSK3, and CLKC kinases, expressed	GSK1 (GSK3/SHAGGY-LIKE PROTEIN KINASE 1); glycogen synthase kinase 3/ kinase
BIN	Ta.704.2.S1_at	0.307136	0.00535881	1.23725	-0.0853969	0.120265	-1.06098	-0.392533	0.000506551	-1.3127	-0.207683	0.0128474	-1.15483	-1.20871	0.000148772	-2.3113	-1.00102	0.00033475	-2.00142	0.0886909	0.16977	1.0634	-0.426128	0.00117956	-1.34362	-1.03462	0.000210346	-2.04857	-0.185223	0.256601	-1.13699	Os10g0521700 protein n=3 Tax=Poaceae RepID=Q8LNI5_ORYSJ	cDNA CGMC_GSK.9 - CGMC includes CDA, MAPK, GSK3, and CLKC kinases, expressed	ATSK12; protein kinase/ protein serine/threonine kinase
BIN	Ta.704.1.A1_at	-0.125631	0.0209549	-1.09099	-0.199586	0.00222653	-1.14837	-0.0739554	0.130383	-1.0526	-0.513247	0.0053559	-1.42726	-0.949876	0.00302793	-1.93171	-0.43663	0.0277404	-1.35344	0.121844	0.224658	1.08813	-0.265772	0.00681596	-1.20228	-0.628447	0.00724872	-1.5459	-0.0574716	0.703138	-1.04064	Os10g0521700 protein n=3 Tax=Poaceae RepID=Q8LNI5_ORYSJ	cDNA CGMC_GSK.9 - CGMC includes CDA, MAPK, GSK3, and CLKC kinases, expressed	shaggy-related protein kinase beta / ASK-beta (ASK2)
BIN	Ta.3003.1.S1_s_at	0.0233049	0.779358	1.01629	0.119833	0.0770163	1.08661	0.0965285	0.200519	1.0692	-0.210814	0.292221	-1.15734	0.110561	0.662439	1.07965	0.321375	0.124792	1.24952	0.099012	0.605466	1.07104	-0.135107	0.12933	-1.09817	0.0897395	0.610634	1.06418	0.674126	0.0149123	1.59563	Shaggy-related protein kinase gamma n=5 Tax=rosids RepID=KSG3_ARATH	cDNA CRAL/TRIO domain containing protein, expressed	ATSK11; protein kinase/ protein serine/threonine kinase
BZR	Ta.1101.1.S1_x_at	1.64224	1.69643e-05	3.1215	0.934896	0.000107315	1.91175	-0.707343	2.64722e-05	-1.63279	1.73078	3.47745e-05	3.31907	1.16571	0.00170018	2.24344	-0.565069	0.0150258	-1.47946	0.426671	0.012571	1.34413	0.515212	0.000330152	1.4292	0.657485	0.00817128	1.57733	0.0655834	0.693806	1.04651		cDNA BES1/BZR1 homolog protein, putative, expressed
A probeset representing a gene related to BR signaling, MFT
MFT	Ta.10074.1.S1_at	-0.0262156	0.841958	-1.01834	-0.799556	0.00268615	-1.74057	-0.773341	0.00281171	-1.70922	-0.933949	0.00266458	-1.9105	-2.01782	0.000254207	-4.04971	-1.08387	0.000830227	-2.11971	-0.252854	0.178906	-1.19156	-1.16059	0.000367445	-2.23549	-1.47111	0.000372277	-2.77236	-0.856963	0.0114853	-1.81122	Homologous protein to MFT n=1 Tax=Hordeum vulgare RepID=B9X077_HORVU	13101.m00150|CHR01V6|COORD:611564..614650|cDNA osMFT2 MFT-Like2 homologous to Mother of FT and TFL1 gene; contains Pfam profile PF01161: Phosphatidylethanolami	CHR1V9|COORD:6228049..6230110| E12A11; phosphatidylethanolamine binding
Probesets representing brassionsteroid regulated genes
PRE	TaAffx.29848.1.S1_at	-0.211548	0.257064	-1.15793	-0.636712	0.0085962	-1.55478	-0.425164	0.0133572	-1.34272	0.604608	0.00124504	1.52056	2.21444	0.000657289	4.64101	1.60983	0.00261274	3.05216	-0.263454	0.112261	-1.20035	0.552702	0.00990816	1.46683	2.5877	0.000368228	6.01138	1.33628	0.0044269	2.525	Os03g0171300 protein n=3 Tax=Poaceae RepID=Q0DUR2_ORYSJ	cDNA expressed protein	KDR (KIDARI); transcription regulator
PRE	TaAffx.23710.1.S1_at	0.236614	0.126754	1.17822	-0.28213	0.107634	-1.21599	-0.518744	0.00174458	-1.43271	0.459462	0.00440389	1.37503	-0.0355974	0.708038	-1.02498	-0.495059	0.000923831	-1.40938	-0.0925495	0.547814	-1.06625	0.130299	0.0279583	1.09452	0.153983	0.129709	1.11264	-0.0324193	0.637544	-1.02273	DNA binding protein n=3 Tax=Poaceae RepID=B6UF44_MAIZE	cDNA helix-loop-helix DNA-binding domain containing protein, expressed	KDR (KIDARI); transcription regulator
PRE	Ta.5495.1.S1_at	0.504847	0.117717	1.41897	0.233026	0.184985	1.1753	-0.271821	0.291036	-1.20733	1.18435	0.00241741	2.27261	2.04631	0.00033519	4.13047	0.861959	0.0204101	1.8175	-0.0958402	0.554977	-1.06869	0.583661	0.096004	1.49865	1.71744	0.000624055	3.28852	0.268782	0.207759	1.20479	DNA binding protein n=3 Tax=Poaceae RepID=B6UF44_MAIZE	cDNA helix-loop-helix DNA-binding domain containing protein, expressed	KDR (KIDARI); transcription regulator
BEE	TaAffx.54345.1.S1_at	0.4696	0.0152842	1.38472	-0.230841	0.0996274	-1.17352	-0.70044	0.00394288	-1.625	-0.159373	0.179031	-1.1168	-0.388643	0.0479134	-1.30916	-0.22927	0.24077	-1.17224	-0.0463115	0.584327	-1.03262	-0.675284	0.00651623	-1.59691	-0.204113	0.263286	-1.15198	0.232575	0.18477	1.17493	Os03g0802900 protein n=3 Tax=Oryza sativa RepID=Q84T08_ORYSJ	cDNA BEE 1, putative, expressed	ZCW32; DNA binding / transcription factor
BEE	Ta.859.1.S1_at	0.97883	2.66875e-05	1.97087	-0.0926443	0.269892	-1.06632	-1.07147	0.00010044	-2.10158	-0.238445	0.00281963	-1.17972	-0.607688	0.0057336	-1.52381	-0.369243	0.030548	-1.29167	0.123042	0.0490085	1.08903	-1.09423	8.44821e-06	-2.135	-0.392002	0.0363272	-1.31221	0.236048	0.123843	1.17776	Os03g0802900 protein n=3 Tax=Oryza sativa RepID=Q84T08_ORYSJ	cDNA BEE 1, putative, expressed	ZCW32; DNA binding / transcription factor
BEE	Ta.3446.1.A1_at	0.657213	0.015474	1.57703	0.365812	0.0972392	1.28861	-0.291401	0.150415	-1.22383	3.22382	1.18444e-05	9.34255	3.78131	2.94719e-06	13.7496	0.557497	0.0072836	1.47171	-0.00284298	0.985045	-1.00197	2.56376	5.81517e-05	5.91247	3.41266	1.49595e-05	10.6491	0.446472	0.084305	1.3627	Os09g0510500 protein n=1 Tax=Oryza sativa Japonica Group RepID=Q0J0G7_ORYSJ	cDNA BEE 1, putative, expressed
BEE	Ta.1690.1.S1_s_at	0.799818	0.000252425	1.74088	0.0671429	0.456374	1.04764	-0.732675	0.00186092	-1.66172	0.980386	8.62815e-05	1.97299	0.68772	0.0334555	1.61074	-0.292666	0.231216	-1.2249	0.121731	0.129716	1.08804	0.302299	0.00817967	1.23311	0.742309	0.0287062	1.67285	0.284028	0.272862	1.21759	Os04g0350700 protein n=4 Tax=Oryza sativa RepID=Q0JDZ1_ORYSJ	cDNA BEE 3, putative, expressed	BRsic helix-loop-helix (bHLH) family protein
AXR	TaAffx.121900.1.S1_at	-0.302033	0.00972107	-1.23288	-0.292871	0.0267145	-1.22508	0.00916178	0.897238	1.00637	-0.357198	0.000652345	-1.28094	-0.166738	0.219213	-1.12252	0.19046	0.176434	1.14113	-0.0946302	0.211821	-1.06779	-0.149796	0.0190064	-1.10941	0.0315025	0.817692	1.02208	-0.121438	0.34815	-1.08782	Auxin-responsive protein IAA1 n=3 Tax=Oryza sativa RepID=IAA1_ORYSJ	cDNA OsIAA1 - Auxin-responsive Aux/IAA gene family member, expressed	AXR3 (AUXIN RESISTANT 3); transcription factor
AXR	Ta.10032.1.S1_a_at	-0.381768	0.00178473	-1.30294	-0.395481	0.00338221	-1.31538	-0.0137128	0.825578	-1.00955	-0.144761	0.0825013	-1.10555	-0.101098	0.10955	-1.07259	0.0436633	0.406535	1.03073	-0.161636	0.0571103	-1.11855	0.0753705	0.233193	1.05363	0.132746	0.0640469	1.09638	0.0165209	0.62353	1.01152	Auxin-responsive protein IAA15 n=3 Tax=Oryza sativa RepID=IAA15_ORYSJ	cDNA OsIAA15 - Auxin-responsive Aux/IAA gene family member, expressed	AXR3 (AUXIN RESISTANT 3); transcription factor
EXO	Ta.9669.1.S1_at	5.29687	2.19177e-07	39.3113	4.64036	2.28941e-06	24.9395	-0.656514	0.00197839	-1.57627	4.21632	0.000420729	18.5882	3.61861	0.000910347	12.2832	-0.597701	0.00851412	-1.5133	-0.313692	0.474351	-1.24289	-1.39425	1.8772e-07	-2.62852	-1.33544	0.000944756	-2.52352	-0.4631	0.11455	-1.3785	Os02g0756800 protein n=3 Tax=Oryza sativa RepID=Q0DXF4_ORYSJ	cDNA phosphate-induced protein 1 conserved region domain containing protein, expressed	EXO (EXORDIUM)
EXO	TaAffx.40634.1.S1_at	1.48197	0.000225711	2.79329	3.06357	0.000203541	8.36037	1.5816	0.00249807	2.99302	1.38848	0.00184012	2.61803	1.20811	0.00758876	2.31035	-0.180371	0.315572	-1.13318	-0.192294	0.402868	-1.14258	-0.285777	0.0285254	-1.21907	-2.04775	0.001593	-4.1346	0.510879	0.0574036	1.42492	Putative phi-1 n=1 Tax=Oryza sativa Japonica Group RepID=Q67X77_ORYSJ	cDNA phosphate-induced protein 1 conserved region domain containing protein, expressed	EXO (EXORDIUM)
EXO	TaAffx.40634.1.S1_x_at	1.85822	0.000214301	3.62559	3.6479	7.49237e-05	12.5351	1.78968	0.000682109	3.45739	1.40738	0.00152167	2.65255	1.36806	0.00228758	2.58123	-0.0393196	0.736988	-1.02763	0.273971	0.27428	1.20913	-0.176867	0.110907	-1.13043	-2.00587	0.000550689	-4.01631	0.550908	0.0210788	1.46501	Putative phi-1 n=1 Tax=Oryza sativa Japonica Group RepID=Q67X77_ORYSJ	cDNA phosphate-induced protein 1 conserved region domain containing protein, expressed	EXO (EXORDIUM)
HERK	Ta.9766.1.S1_a_at	1.39946	1.2656e-05	2.63803	0.36926	0.0108657	1.29169	-1.0302	8.45458e-05	-2.04231	1.69937	0.00176599	3.24759	1.12895	0.00823373	2.18699	-0.57042	0.00187783	-1.48496	-0.0161628	0.947345	-1.01127	0.283745	0.00476249	1.21735	0.743526	0.00104967	1.67426	0.0924255	0.428105	1.06616	Os06g0334300 protein n=3 Tax=Oryza sativa RepID=Q5Z755_ORYSJ	cDNA TKL_IRAK_CrRLK1L-1.14 - The CrRLK1L-1 subfamily has homology to the CrRLK1L homolog, expressed	protein kinase, putative
HERK	Ta.9766.1.S1_at	2.63121	0.000467347	6.19543	1.97245	0.00227608	3.92433	-0.658757	0.0179591	-1.57872	2.84091	0.000374349	7.1647	2.65866	0.000772752	6.31447	-0.182246	0.292899	-1.13465	0.198188	0.59871	1.14726	0.40789	0.00997661	1.32674	0.884401	0.0134092	1.846	-0.0383668	0.863673	-1.02695	Os06g0334300 protein n=3 Tax=Oryza sativa RepID=Q5Z755_ORYSJ	cDNA TKL_IRAK_CrRLK1L-1.14 - The CrRLK1L-1 subfamily has homology to the CrRLK1L homolog, expressed	protein kinase, putative
HERK	Ta.9766.1.S1_x_at	1.78652	0.000185543	3.44983	0.942542	0.00281319	1.92191	-0.843983	0.000894175	-1.795	1.92502	0.000702338	3.79742	1.57165	0.00185647	2.97245	-0.353368	0.0288579	-1.27754	0.17017	0.501354	1.12519	0.308665	0.0188019	1.23856	0.79928	0.00241432	1.74023	0.131429	0.316619	1.09538	Os06g0334300 protein n=3 Tax=Oryza sativa RepID=Q5Z755_ORYSJ	cDNA TKL_IRAK_CrRLK1L-1.14 - The CrRLK1L-1 subfamily has homology to the CrRLK1L homolog, expressed	protein kinase, putative
HERK	Ta.11112.1.S1_at	0.841114	0.00539393	1.79143	0.0570476	0.759556	1.04034	-0.784066	0.0167672	-1.72198	0.74136	0.00953002	1.67175	0.482323	0.00212187	1.39699	-0.259037	0.176526	-1.19668	-0.16374	0.172001	-1.12019	-0.263493	0.253277	-1.20038	0.261535	0.175146	1.19875	-0.0611909	0.369406	-1.04333	Os03g0124200 protein n=2 Tax=Oryza sativa RepID=Q10SF5_ORYSJ	cDNA TKL_IRAK_CrRLK1L-1.6 - The CrRLK1L-1 subfamily has homology to the CrRLK1L homolog, expressed	protein kinase, putative
HERK	Ta.26337.1.A1_at	0.860046	0.00499134	1.8151	-0.0634955	0.724277	-1.04499	-0.923541	0.00108208	-1.89677	0.671347	0.000574994	1.59256	-0.146563	0.110086	-1.10693	-0.81791	0.000420567	-1.76285	-0.0596429	0.707104	-1.04221	-0.248341	0.0353491	-1.18784	-0.142711	0.252935	-1.10398	0.015068	0.934615	1.0105	Putative uncharacterized protein Sb06g029710 n=1 Tax=Sorghum bicolor RepID=C5YGN6_SORBI	cDNA TKL_IRAK_CrRLK1L-1.3 - The CrRLK1L-1 subfamily has homology to the CrRLK1L homolog, expressed	FER (FERONIA); kinase/ protein kinase
HERK	TaAffx.10874.1.S1_at	1.43501	0.00608333	2.70385	1.77594	0.00460064	3.4246	0.340921	0.224003	1.26656	1.79886	0.00134412	3.47945	2.23944	0.000319588	4.72214	0.440585	0.0420699	1.35715	0.372835	0.281024	1.29489	0.736678	0.0166704	1.66633	0.836341	0.0163083	1.78552	0.357043	0.177996	1.2808	Putative uncharacterized protein Sb06g029710 n=1 Tax=Sorghum bicolor RepID=C5YGN6_SORBI	cDNA TKL_IRAK_CrRLK1L-1.3 - The CrRLK1L-1 subfamily has homology to the CrRLK1L homolog, expressed	FER (FERONIA); kinase/ protein kinase
HERK	TaAffx.10874.3.S1_s_at	0.149487	0.302099	1.10918	-0.268338	0.094187	-1.20442	-0.417825	0.00480204	-1.33591	0.518258	0.0551528	1.43223	0.0385393	0.842372	1.02707	-0.479718	0.00763371	-1.39447	-0.163972	0.474864	-1.12037	0.204799	0.109811	1.15253	0.142906	0.107163	1.10413	-0.103024	0.219562	-1.07402	Putative uncharacterized protein Sb06g029710 n=1 Tax=Sorghum bicolor RepID=C5YGN6_SORBI	cDNA TKL_IRAK_CrRLK1L-1.3 - The CrRLK1L-1 subfamily has homology to the CrRLK1L homolog, expressed	FER (FERONIA); kinase/ protein kinase
HERK	TaAffx.108279.1.S1_at	-0.0258166	0.743657	-1.01806	-0.472941	0.00468824	-1.38794	-0.447125	0.000672169	-1.36332	0.0522001	0.730302	1.03685	-0.48403	0.0112877	-1.39864	-0.53623	0.0274587	-1.45018	-0.138975	0.205414	-1.10112	-0.0609584	0.663466	-1.04316	-0.150063	0.212991	-1.10962	0.00535118	0.959503	1.00372	Putative uncharacterized protein Sb06g029710 n=1 Tax=Sorghum bicolor RepID=C5YGN6_SORBI	cDNA TKL_IRAK_CrRLK1L-1.3 - The CrRLK1L-1 subfamily has homology to the CrRLK1L homolog, expressed	FER (FERONIA); kinase/ protein kinase
HERK	TaAffx.120729.1.S1_at	0.131844	0.41992	1.09569	-0.13884	0.149965	-1.10102	-0.270684	0.127402	-1.20638	0.310028	0.0441031	1.23973	0.0486883	0.720067	1.03432	-0.261339	0.177719	-1.19859	-0.0927488	0.251738	-1.0664	0.0854351	0.63757	1.06101	0.0947798	0.511195	1.0679	0.066456	0.658965	1.04714	Os05g0318700 protein (Fragment) n=3 Tax=Oryza sativa RepID=Q0DJ75_ORYSJ	cDNA TKL_IRAK_CrRLK1L-1.3 - The CrRLK1L-1 subfamily has homology to the CrRLK1L homolog, expressed	FER (FERONIA); kinase/ protein kinase
HERK	TaAffx.57593.1.S1_at	0.215076	0.384018	1.16077	-0.496437	0.0543532	-1.41073	-0.711512	0.0110605	-1.63752	0.317324	0.352619	1.24602	-0.473479	0.222918	-1.38845	-0.790803	0.00485532	-1.73004	-0.0940404	0.798048	-1.06736	0.00820812	0.957948	1.00571	-0.0710824	0.667323	-1.05051	0.0331536	0.849625	1.02325	Putative uncharacterized protein Sb06g029710 n=1 Tax=Sorghum bicolor RepID=C5YGN6_SORBI	cDNA TKL_IRAK_CrRLK1L-1.3 - The CrRLK1L-1 subfamily has homology to the CrRLK1L homolog, expressed	protein kinase family protein
HERK	Ta.14561.2.S1_a_at	2.78759	4.08721e-05	6.90475	1.36404	0.000938485	2.57405	-1.42355	4.84676e-05	-2.68245	2.93529	0.000685774	7.64908	2.07932	0.00377396	4.22608	-0.855965	0.00579033	-1.80997	-0.228603	0.534921	-1.1717	-0.0809072	0.167287	-1.05768	0.48668	0.0457419	1.40122	0.499223	0.124919	1.41345	Putative uncharacterized protein Sb01g036260 n=1 Tax=Sorghum bicolor RepID=C5X0U7_SORBI	cDNA TKL_IRAK_CrRLK1L-1.5 - The CrRLK1L-1 subfamily has homology to the CrRLK1L homolog, expressed	FER (FERONIA); kinase/ protein kinase
HERK	Ta.14561.1.S1_at	3.44716	2.71265e-05	10.9069	2.12759	0.000286815	4.36987	-1.31957	0.000209632	-2.49592	3.226	0.000274133	9.35668	2.09153	0.00133337	4.262	-1.13447	4.99627e-05	-2.19537	0.0987212	0.761014	1.07082	-0.122447	0.174331	-1.08858	0.0626605	0.539416	1.04439	0.0654423	0.49393	1.04641	Putative uncharacterized protein Sb01g036260 n=1 Tax=Sorghum bicolor RepID=C5X0U7_SORBI	cDNA TKL_IRAK_CrRLK1L-1.5 - The CrRLK1L-1 subfamily has homology to the CrRLK1L homolog, expressed	FER (FERONIA); kinase/ protein kinase
HERK	Ta.14561.3.S1_at	-0.073382	0.508024	-1.05218	-0.0648456	0.462433	-1.04597	0.00853633	0.905576	1.00593	0.0945984	0.393543	1.06777	0.30487	0.110203	1.23531	0.210272	0.249726	1.15691	-0.231669	0.0794233	-1.17419	-0.0636885	0.562829	-1.04513	0.138047	0.370754	1.10041	0.113529	0.455349	1.08187	Receptor-like protein kinase FERONIA n=4 Tax=Brassicaceae RepID=FERON_ARATH	cDNA TKL_IRAK_CrRLK1L-1.5 - The CrRLK1L-1 subfamily has homology to the CrRLK1L homolog, expressed	FER (FERONIA); kinase/ protein kinase
HERK	Ta.11488.1.S1_s_at	3.22958	3.43819e-06	9.37993	1.87753	9.43552e-05	3.67444	-1.35205	0.000130618	-2.55275	3.24946	0.000305801	9.5101	2.26087	0.00122992	4.79281	-0.988588	7.32711e-05	-1.98424	-0.178607	0.566633	-1.13179	-0.158724	0.0468689	-1.1163	0.20474	0.097034	1.15248	0.310448	0.0957674	1.24009	Putative uncharacterized protein n=1 Tax=Oryza sativa Indica Group RepID=A2WVH5_ORYSI	cDNA TKL_IRAK_CrRLK1L-1.5 - The CrRLK1L-1 subfamily has homology to the CrRLK1L homolog, expressed	protein kinase family protein
HERK	Ta.11488.1.S1_x_at	3.27541	1.82887e-06	9.68272	1.82951	3.54143e-05	3.55416	-1.4459	9.42746e-05	-2.72433	2.97759	0.000208468	7.87667	2.04682	0.000932813	4.13194	-0.930769	0.000166259	-1.90629	-0.00957185	0.969245	-1.00666	-0.307397	0.0113344	-1.23747	0.207735	0.0840773	1.15487	0.270531	0.0760381	1.20625	Putative uncharacterized protein n=1 Tax=Oryza sativa Indica Group RepID=A2WVH5_ORYSI	cDNA TKL_IRAK_CrRLK1L-1.5 - The CrRLK1L-1 subfamily has homology to the CrRLK1L homolog, expressed	protein kinase family protein
HERK	TaAffx.48080.1.S1_at	1.8819	0.00018783	3.68561	1.5873	0.000319747	3.00488	-0.294599	0.0150038	-1.22654	1.98843	0.000188556	3.96804	2.18686	0.00041543	4.55315	0.198437	0.234118	1.14745	0.372365	0.131077	1.29447	0.478888	0.00174312	1.39367	0.971924	0.00260484	1.96145	0.154527	0.448876	1.11306	Os04g0619600 protein n=4 Tax=Oryza sativa RepID=Q7XTT9_ORYSJ	cDNA TKL_IRAK_CrRLK1L-1.9 - The CrRLK1L-1 subfamily has homology to the CrRLK1L homolog, expressed	protein kinase family protein
HERK	Ta.16484.1.S1_at	-0.0717814	0.550995	-1.05101	-0.0559631	0.424326	-1.03955	0.0158184	0.906267	1.01103	-0.0787351	0.428486	-1.05609	-0.0447219	0.644629	-1.03148	0.0340132	0.512816	1.02386	-0.168271	0.115153	-1.12371	-0.175225	0.201385	-1.12914	-0.15703	0.0905848	-1.11499	-0.0279876	0.675452	-1.01959	Os03g0281500 protein n=3 Tax=Oryza sativa RepID=Q10N60_ORYSJ	protein TKL_IRAK_CrRLK1L-1.7 - The CrRLK1L-1 subfamily has homology to the CrRLK1L homolog, expressed	protein kinase family protein

## Sheet: Ethylene metabolism
Table S2. Changes in the expression of ethylene metabolism related probesets between dormant and after-ripened seeds in both dry and imbibed states
		D-12/D-0			D-24/D-0			D-24/D-12			AR-12/AR-0			AR-24/AR-0			AR-24/AR-12			AR-0/D-0			AR-12/D-12			AR-24/D-24			AR-24/AR-24+ABA			Annotation
Gene	Probeset	Log2 FC	P-value	Linear FC	Log2 FC	P-value	Linear FC	Log2 FC	P-value	Linear FC	Log2 FC	P-value	Linear FC	Log2 FC	P-value	Linear FC	Log2 FC	P-value	Linear FC	Log2 FC	P-value	Linear FC	Log2 FC	P-value	Linear FC	Log2 FC	P-value	Linear FC	Log2 FC	P-value	Linear FC	UniProt Desc	Rice 6 Desc	Arab. Desc
ACS	Ta.25755.1.A1_at	0.024523	0.911256	1.01714	-0.0293097	0.851741	-1.02052	-0.0538327	0.761032	-1.03802	-0.103037	0.648435	-1.07403	-0.337016	0.081267	-1.26314	-0.233978	0.214815	-1.17607	0.273468	0.23515	1.20871	0.145908	0.542593	1.10643	-0.0342376	0.632641	-1.02402	-0.0424757	0.531687	-1.02988	ACC synthase n=1 Tax=Triticum aestivum RepID=Q43204_WHEAT	cDNA aminotransferase, classes I and II, domain containing protein, expressed	ACS2; 1-aminocyclopropane-1-carboxylate synthase
ACS	Ta.24076.1.S1_at	0.128694	0.0374369	1.0933	-0.478793	0.000324169	-1.39358	-0.607487	8.50599e-07	-1.5236	0.0472767	0.474161	1.03331	-0.633922	0.0223923	-1.55178	-0.681199	0.0153682	-1.60347	0.0586925	0.441578	1.04152	-0.0227246	0.412921	-1.01588	-0.0964365	0.593314	-1.06913	-0.27266	0.238938	-1.20803	ACC synthase n=1 Tax=Triticum aestivum RepID=Q43204_WHEAT	cDNA aminotransferase, classes I and II, domain containing protein, expressed	ACS6 (1-AMINOCYCLOPROPANE-1-CARBOXYLIC ACID (ACC) SYNTHASE 6); 1-aminocyclopropane-1-carboxylate synthase
ACS	TaAffx.71241.1.A1_at	-1.62715	5.52664e-07	-3.08902	-1.63322	0.000241995	-3.10204	-0.0060676	0.965704	-1.00422	-1.65156	2.86449e-05	-3.14173	-2.01017	1.34562e-05	-4.0283	-0.35861	0.000190457	-1.28219	0.0176917	0.829606	1.01234	-0.00671762	0.831461	-1.00467	-0.35926	0.0530257	-1.28277	-0.519396	0.00905934	-1.43335	ACC synthase n=1 Tax=Triticum aestivum RepID=Q43204_WHEAT	cDNA aminotransferase, classes I and II, domain containing protein, expressed
ACS	Ta.24341.1.S1_x_at	1.20973	0.00040996	2.31294	0.688188	0.00746486	1.61126	-0.52154	0.00384475	-1.43549	1.53678	0.000125679	2.90147	0.509703	0.0661656	1.42376	-1.02708	0.00457157	-2.0379	-0.142664	0.390835	-1.10394	0.184391	0.00779031	1.13634	-0.321149	0.175567	-1.24933	-0.0479218	0.821674	-1.03378	1-aminocyclopropane-1-carboxylate synthase (Fragment) n=1 Tax=Triticum aestivum RepID=Q43201_WHEAT	cDNA aminotransferase, classes I and II, domain containing protein, expressed	ACS12; 1-aminocyclopropane-1-carboxylate synthase/ L-aspartate:2-oxoglutarate aminotransferase/ aromatic-amino-acid:2-oxoglutar
ACS	TaAffx.70620.1.S1_at	0.761156	0.00423901	1.69485	0.967088	0.00152073	1.95489	0.205932	0.00470563	1.15343	1.12792	0.0156547	2.18544	0.578121	0.125922	1.4929	-0.549802	0.0125053	-1.46388	0.0256151	0.936575	1.01791	0.392381	0.00269397	1.31256	-0.363352	0.0374266	-1.28641	-0.174293	0.257577	-1.12841	Putative uncharacterized protein Sb10g001990 n=1 Tax=Sorghum bicolor RepID=C5Z3A4_SORBI	cDNA aminotransferase, classes I and II, domain containing protein, expressed	ACS12; 1-aminocyclopropane-1-carboxylate synthase/ L-aspartate:2-oxoglutarate aminotransferase/ aromatic-amino-acid:2-oxoglutar
ACO	Ta.9107.1.S1_x_at	4.43965	8.78418e-05	21.7005	4.3123	0.000120523	19.8669	-0.127357	0.278364	-1.09229	4.71475	3.20271e-06	26.2592	4.84423	2.71398e-06	28.7249	0.129475	0.0231596	1.0939	0.10405	0.747171	1.07479	0.379148	0.00100116	1.30057	0.63598	0.00295798	1.55399	-0.0411159	0.566613	-1.02891	1-aminocyclopropane-1-carboxylate oxidase n=1 Tax=Phyllostachys edulis RepID=Q9AYS8_9POAL	cDNA 1-aminocyclopropane-1-carboxylate oxidase protein, putative, expressed	EFE (ETHYLENE-FORMING ENZYME); 1-aminocyclopropane-1-carboxylate oxidase
ACO	Ta.9107.2.S1_a_at	3.94344	0.000110574	15.3849	3.66178	0.00016276	12.6563	-0.281657	0.0228269	-1.21559	4.67271	1.21873e-06	25.5051	5.0621	1.30322e-06	33.4074	0.389385	0.00178174	1.30984	-0.388548	0.231138	-1.30907	0.340724	0.00120649	1.26639	1.01177	0.000281589	2.01638	0.233495	0.188643	1.17568	1-aminocyclopropane-1-carboxylate oxidase n=1 Tax=Phyllostachys edulis RepID=Q9AYS8_9POAL	cDNA 1-aminocyclopropane-1-carboxylate oxidase protein, putative, expressed	EFE (ETHYLENE-FORMING ENZYME); 1-aminocyclopropane-1-carboxylate oxidase
ACO	Ta.9107.2.S1_at	0.028236	0.82349	1.01976	-0.0790297	0.67524	-1.05631	-0.107266	0.598704	-1.07719	-0.00914025	0.935066	-1.00636	1.14354	2.06087e-05	2.20923	1.15268	0.000389059	2.22327	0.22218	0.0454252	1.1665	0.184804	0.252997	1.13666	1.44475	0.000931554	2.72216	0.572991	0.0553429	1.48761	1-aminocyclopropane-1-carboxylate oxidase n=1 Tax=Phyllostachys edulis RepID=Q9AYS8_9POAL	cDNA 1-aminocyclopropane-1-carboxylate oxidase protein, putative, expressed	EFE (ETHYLENE-FORMING ENZYME); 1-aminocyclopropane-1-carboxylate oxidase
ACO	Ta.20570.1.A1_at	0.105194	0.323543	1.07564	-0.255934	0.0929306	-1.19411	-0.361127	0.0165897	-1.28443	0.0367492	0.788504	1.0258	-0.166708	0.242603	-1.12249	-0.203457	0.0176794	-1.15145	0.0103377	0.946878	1.00719	-0.0581068	0.405039	-1.0411	0.0995634	0.303407	1.07145	-0.112932	0.221445	-1.08142	1-aminocyclopropane-1-carboxylate oxidase (Fragment) n=2 Tax=Andropogoneae RepID=O81607_SORBI	cDNA 1-aminocyclopropane-1-carboxylate oxidase protein, putative, expressed	EFE (ETHYLENE-FORMING ENZYME); 1-aminocyclopropane-1-carboxylate oxidase
ACO	Ta.425.1.S1_s_at	1.77407	9.31594e-08	3.42017	2.13673	6.79207e-07	4.39763	0.362658	0.00110831	1.28579	1.20918	0.000146999	2.31207	1.86777	0.0063762	3.64967	0.658584	0.130276	1.57853	0.14993	0.155145	1.10952	-0.414955	3.26215e-05	-1.33326	-0.119028	0.750072	-1.086	0.494233	0.259653	1.40857	Os02g0771600 protein n=3 Tax=Oryza sativa RepID=Q6ZHG2_ORYSJ	cDNA 1-aminocyclopropane-1-carboxylate oxidase protein, putative, expressed	EFE (ETHYLENE-FORMING ENZYME); 1-aminocyclopropane-1-carboxylate oxidase
ACO	Ta.425.2.S1_at	0.0274635	0.851918	1.01922	-0.387005	0.00252909	-1.30768	-0.414469	0.0370119	-1.33281	-0.015727	0.888308	-1.01096	-0.295885	0.0266834	-1.22764	-0.280158	0.0204193	-1.21433	-0.156359	0.165641	-1.11447	-0.199549	0.24568	-1.14834	-0.0652391	0.240255	-1.04626	-0.142968	0.0367273	-1.10417	Os02g0771600 protein n=3 Tax=Oryza sativa RepID=Q6ZHG2_ORYSJ	cDNA 1-aminocyclopropane-1-carboxylate oxidase protein, putative, expressed	EFE (ETHYLENE-FORMING ENZYME); 1-aminocyclopropane-1-carboxylate oxidase
ACO	Ta.425.3.A1_at	-0.304531	0.0643626	-1.23502	-0.163527	0.107754	-1.12002	0.141004	0.320196	1.10267	-0.607761	0.0106136	-1.52389	-0.277526	0.0404716	-1.21212	0.330235	0.111576	1.25722	0.0158942	0.778415	1.01108	-0.287336	0.170701	-1.22038	-0.0981046	0.423097	-1.07037	-0.262364	0.0723699	-1.19944	1-aminocyclopropane-1-carboxylate oxidase (Fragment) n=2 Tax=Andropogoneae RepID=O81607_SORBI	cDNA 1-aminocyclopropane-1-carboxylate oxidase protein, putative, expressed	EFE (ETHYLENE-FORMING ENZYME); 1-aminocyclopropane-1-carboxylate oxidase
ACO	TaAffx.59867.1.S1_at	0.960694	0.00178955	1.94625	1.61037	0.000279575	3.05331	0.649679	0.0065643	1.56882	0.416679	0.0898256	1.33485	1.18865	0.0332413	2.2794	0.771974	0.0969792	1.70761	-0.0466245	0.809275	-1.03285	-0.59064	0.0130074	-1.50591	-0.468344	0.2548	-1.38352	0.913094	0.0696046	1.88308	Os02g0771600 protein n=3 Tax=Oryza sativa RepID=Q6ZHG2_ORYSJ	cDNA 1-aminocyclopropane-1-carboxylate oxidase protein, putative, expressed	EFE (ETHYLENE-FORMING ENZYME); 1-aminocyclopropane-1-carboxylate oxidase
ACO	TaAffx.59867.2.S1_at	0.539483	0.0143082	1.45345	-0.300466	0.112758	-1.23154	-0.839948	0.000948291	-1.78999	0.502494	0.00524235	1.41666	-0.263378	0.107029	-1.20029	-0.765871	0.0062486	-1.7004	-0.00880474	0.948582	-1.00612	-0.045794	0.649966	-1.03225	0.0282832	0.857101	1.0198	0.03265	0.814377	1.02289	Os02g0771600 protein n=3 Tax=Oryza sativa RepID=Q6ZHG2_ORYSJ	cDNA 1-aminocyclopropane-1-carboxylate oxidase protein, putative, expressed	ACO2 (ACC OXIDASE 2); 1-aminocyclopropane-1-carboxylate oxidase
ACO	TaAffx.100446.1.S1_at	0.263498	0.0506896	1.20039	-0.0104846	0.948737	-1.00729	-0.273983	0.0943049	-1.20914	0.575665	0.00481575	1.49036	1.23655	0.00312715	2.35634	0.660882	0.0292817	1.58105	-0.15349	0.245055	-1.11226	0.158677	0.125433	1.11626	1.09354	0.00768581	2.13397	0.578384	0.111815	1.49318	Putative uncharacterized protein Sb02g026280 n=1 Tax=Sorghum bicolor RepID=C5X274_SORBI	cDNA 1-aminocyclopropane-1-carboxylate oxidase 1, putative, expressed	EFE (ETHYLENE-FORMING ENZYME); 1-aminocyclopropane-1-carboxylate oxidase
ACO	Ta.18698.1.S1_at	0.384832	0.0286021	1.30571	-0.269392	0.0737611	-1.2053	-0.654224	0.0119841	-1.57377	0.339493	0.0677004	1.26531	-0.103818	0.580974	-1.07461	-0.443312	0.0608823	-1.35972	0.02321	0.837592	1.01622	-0.0221286	0.884872	-1.01546	0.188784	0.345516	1.1398	0.0458739	0.777469	1.03231	1-aminocyclopropane-1-carboxylate oxidase, putative, expressed n=2 Tax=Oryza sativa RepID=Q53P53_ORYSJ	cDNA 1-aminocyclopropane-1-carboxylate oxidase, putative, expressed	1-aminocyclopropane-1-carboxylate oxidase, putative / ACC oxidase, putative
ACO	TaAffx.80306.1.S1_at	-0.430262	0.0561542	-1.34748	-1.0392	0.00677634	-2.05509	-0.608939	0.0196947	-1.52514	-0.129137	0.126174	-1.09364	-0.636955	0.00224196	-1.55504	-0.507818	0.0017337	-1.4219	-0.39378	0.0655989	-1.31383	-0.0926556	0.300735	-1.06633	0.00846571	0.959642	1.00588	-0.167531	0.115664	-1.12313	1-aminocyclopropane-1-carboxylate oxidase (Fragment) n=1 Tax=Triticum monococcum RepID=A6XMZ3_TRIMO	cDNA 1-aminocyclopropane-1-carboxylate oxidase, putative, expressed	1-aminocyclopropane-1-carboxylate oxidase, putative / ACC oxidase, putative
ACO	Ta.22475.1.S1_at	0.670583	0.00468688	1.59172	-0.0190157	0.766535	-1.01327	-0.689599	0.00365953	-1.61284	0.683745	9.32642e-05	1.6063	-0.0470644	0.462982	-1.03316	-0.73081	0.000392726	-1.65957	0.0741424	0.228039	1.05273	0.0873046	0.486516	1.06238	0.0460937	0.517721	1.03247	0.0295839	0.635307	1.02072	Os05g0149400 protein n=3 Tax=Oryza sativa RepID=Q65XE5_ORYSJ	cDNA 1-aminocyclopropane-1-carboxylate oxidase, putative, expressed	1-aminocyclopropane-1-carboxylate oxidase, putative / ACC oxidase, putative
ACO	Ta.28756.2.S1_at	-0.202502	0.178183	-1.15069	-0.46826	0.0079292	-1.38344	-0.265758	0.139824	-1.20227	-0.426366	0.00884536	-1.34384	-0.804155	0.00361716	-1.74612	-0.377789	0.0321297	-1.29935	0.188978	0.0955109	1.13996	-0.0348856	0.795369	-1.02448	-0.146917	0.344025	-1.1072	-0.000837712	0.995443	-1.00058	Os05g0149400 protein n=3 Tax=Oryza sativa RepID=Q65XE5_ORYSJ	cDNA 1-aminocyclopropane-1-carboxylate oxidase, putative, expressed	1-aminocyclopropane-1-carboxylate oxidase, putative / ACC oxidase, putative
ACO	Ta.28756.2.S1_x_at	-0.13226	0.318887	-1.09601	-0.373762	0.0289315	-1.29573	-0.241502	0.113663	-1.18222	-0.619492	0.000918894	-1.53633	-0.823978	0.000277033	-1.77028	-0.204485	0.0800848	-1.15227	0.334688	0.0156369	1.2611	-0.152544	0.229678	-1.11153	-0.115528	0.320537	-1.08337	0.0882834	0.618341	1.0631	Os05g0149400 protein n=3 Tax=Oryza sativa RepID=Q65XE5_ORYSJ	cDNA 1-aminocyclopropane-1-carboxylate oxidase, putative, expressed	1-aminocyclopropane-1-carboxylate oxidase, putative / ACC oxidase, putative
ACO	Ta.28942.1.S1_at	-0.342188	0.0875094	-1.26768	-0.536947	0.00172408	-1.4509	-0.194759	0.301627	-1.14453	-0.287444	0.00949636	-1.22048	-0.317492	0.0267435	-1.24616	-0.0300483	0.780835	-1.02105	-0.310035	0.00173383	-1.23974	-0.25529	0.18275	-1.19358	-0.0905796	0.45578	-1.0648	0.0937764	0.346366	1.06716	Os05g0149400 protein n=3 Tax=Oryza sativa RepID=Q65XE5_ORYSJ	cDNA 1-aminocyclopropane-1-carboxylate oxidase, putative, expressed	1-aminocyclopropane-1-carboxylate oxidase, putative / ACC oxidase, putative
ACO	Ta.28942.1.S1_x_at	0.379783	0.0983375	1.30115	-0.0701347	0.693994	-1.04981	-0.449918	0.0170298	-1.36596	0.367001	0.0188163	1.28967	-0.11008	0.250562	-1.07929	-0.477081	0.00152416	-1.39193	0.00470507	0.979253	1.00327	-0.00807736	0.943863	-1.00561	-0.0352407	0.653176	-1.02473	-0.0248271	0.688898	-1.01736	Os05g0149400 protein n=3 Tax=Oryza sativa RepID=Q65XE5_ORYSJ	cDNA 1-aminocyclopropane-1-carboxylate oxidase, putative, expressed	1-aminocyclopropane-1-carboxylate oxidase, putative / ACC oxidase, putative
ACO	TaAffx.28482.1.S1_at	0.684194	0.000168222	1.6068	-0.0707739	0.198989	-1.05028	-0.754968	5.85921e-05	-1.68759	0.604332	0.00467452	1.52028	-0.0336467	0.739999	-1.0236	-0.637979	0.00646736	-1.55615	-0.0158192	0.815149	-1.01103	-0.0956813	0.387187	-1.06857	0.021308	0.812173	1.01488	0.107388	0.375577	1.07728	1-aminocyclopropane-1-carboxylate oxidase (Fragment) n=1 Tax=Triticum monococcum RepID=A6XMZ3_TRIMO	cDNA 1-aminocyclopropane-1-carboxylate oxidase, putative, expressed	1-aminocyclopropane-1-carboxylate oxidase, putative / ACC oxidase, putative
ACO	Ta.21049.1.S1_at	5.83108	4.01219e-06	56.9287	4.17199	3.22777e-05	18.0258	-1.65909	0.0009095	-3.15818	7.02654	7.05882e-06	130.376	6.19358	1.99448e-05	73.1904	-0.832955	0.00454941	-1.78133	-0.163883	0.564242	-1.1203	1.03157	0.000884727	2.04425	1.85771	0.000854697	3.62432	-0.606981	0.0249457	-1.52307	Os01g0580500 protein n=2 Tax=Oryza sativa Japonica Group RepID=Q8W096_ORYSJ	cDNA 1-aminocyclopropane-1-carboxylate oxidase protein, putative, expressed	ACO1 (ACC OXIDASE 1); 1-aminocyclopropane-1-carboxylate oxidase
ACO	Ta.21049.2.S1_at	0.298389	0.0544071	1.22977	-0.0497139	0.80794	-1.03506	-0.348102	0.0909471	-1.27289	0.478732	0.00159035	1.39352	0.0719784	0.730619	1.05116	-0.406754	0.100787	-1.3257	0.250426	0.108406	1.18956	0.43077	0.000341235	1.34795	0.372119	0.202944	1.29425	0.0176889	0.936975	1.01234	Putative uncharacterized protein Sb03g026000 n=1 Tax=Sorghum bicolor RepID=C5XNU1_SORBI	cDNA 1-aminocyclopropane-1-carboxylate oxidase protein, putative, expressed	ACO1 (ACC OXIDASE 1); 1-aminocyclopropane-1-carboxylate oxidase
ACO	Ta.21049.2.S1_x_at	1.58956	2.4602e-05	3.00957	-0.062679	0.484274	-1.0444	-1.65224	1.13165e-05	-3.14321	1.71594	8.08061e-06	3.28511	0.0413222	0.766099	1.02906	-1.67462	0.000168053	-3.19235	0.12352	0.202698	1.08939	0.249905	0.00500298	1.18913	0.227521	0.154801	1.17082	-0.0204916	0.904498	-1.01431	Putative uncharacterized protein Sb03g026000 n=1 Tax=Sorghum bicolor RepID=C5XNU1_SORBI	cDNA 1-aminocyclopropane-1-carboxylate oxidase protein, putative, expressed	ACO1 (ACC OXIDASE 1); 1-aminocyclopropane-1-carboxylate oxidase
ACO	Ta.21049.3.S1_at	-0.00689777	0.908256	-1.00479	-0.208239	0.0224204	-1.15528	-0.201341	0.00235768	-1.14977	0.203736	0.033569	1.15168	-0.0888841	0.352782	-1.06355	-0.292619	0.0107334	-1.22486	-0.120782	0.203793	-1.08732	0.0898508	0.0421578	1.06426	-0.00142739	0.983359	-1.00099	-0.144627	0.218014	-1.10545	Putative uncharacterized protein n=1 Tax=Oryza sativa Indica Group RepID=B8AAQ7_ORYSI	cDNA 1-aminocyclopropane-1-carboxylate oxidase protein, putative, expressed

## Sheet: Ethylene signalling
Table S2. Changes in the expression of ethylene signaling related probesets between dormant and after-ripened seeds in both dry and imbibed states
		D-12/D-0			D-24/D-0			D-24/D-12			AR-12/AR-0			AR-24/AR-0			AR-24/AR-12			AR-0/D-0			AR-12/D-12			AR-24/D-24			AR-24/AR-24+ABA			Annotation
Gene	Probeset	Log2 FC	P-value	Linear FC	Log2 FC	P-value	Linear FC	Log2 FC	P-value	Linear FC	Log2 FC	P-value	Linear FC	Log2 FC	P-value	Linear FC	Log2 FC	P-value	Linear FC	Log2 FC	P-value	Linear FC	Log2 FC	P-value	Linear FC	Log2 FC	P-value	Linear FC	Log2 FC	P-value	Linear FC	UniProt Desc	Rice 6 Desc	Arab. Desc
RAN	TaAffx.78135.1.S1_at	0.950396	0.00106853	1.9324	-0.0766591	0.61555	-1.05457	-1.02706	0.000647358	-2.03786	1.68955	3.02473e-05	3.22555	0.365671	0.0112231	1.28848	-1.32388	5.4433e-05	-2.50338	-0.502455	0.0140135	-1.41662	0.236695	0.024806	1.17829	-0.0601252	0.613976	-1.04256	0.181752	0.365516	1.13426	Putative uncharacterized protein Sb10g026600 n=1 Tax=Sorghum bicolor RepID=C5Z7M7_SORBI	cDNA copper-transporting ATPase, putative, expressed	RAN1 (RESPONSIVE-TO-ANTAGONIST 1); ATPase, coupled to transmembrane movement of ions, phosphorylative mechanism / copper ion tr
RAN	TaAffx.91780.1.S1_at	0.401234	0.00132672	1.32064	-0.0192961	0.845484	-1.01347	-0.42053	0.00983628	-1.33842	1.03308	0.000433212	2.04639	0.143882	0.395621	1.10487	-0.889197	0.00163097	-1.85215	-0.317499	0.0371099	-1.24617	0.314346	0.00080462	1.24345	-0.154321	0.34554	-1.1129	0.119584	0.474331	1.08642	Os02g0172600 protein n=4 Tax=Oryza sativa RepID=Q0E3J1_ORYSJ	cDNA copper-transporting ATPase, putative, expressed	RAN1 (RESPONSIVE-TO-ANTAGONIST 1); ATPase, coupled to transmembrane movement of ions, phosphorylative mechanism / copper ion tr
RAN	TaAffx.59221.1.S1_at	1.27672	0.000862429	2.42287	0.70737	0.00699792	1.63282	-0.569346	0.00470508	-1.48385	2.00717	0.000370912	4.01993	0.757195	0.0156802	1.6902	-1.24998	0.000277154	-2.37838	-0.200171	0.390302	-1.14884	0.530284	0.00567638	1.44421	-0.150347	0.229155	-1.10984	-0.0591	0.534621	-1.04182	Putative uncharacterized protein Sb04g004820 n=2 Tax=Andropogoneae RepID=C5XW52_SORBI	cDNA copper-transporting ATPase, putative, expressed	RAN1 (RESPONSIVE-TO-ANTAGONIST 1); ATPase, coupled to transmembrane movement of ions, phosphorylative mechanism / copper ion tr
RAN	Ta.9007.1.A1_at	1.25197	0.000896713	2.38166	1.20123	0.000149563	2.29936	-0.0507383	0.729024	-1.0358	1.69205	0.000142738	3.23115	0.60597	0.0176714	1.522	-1.08608	0.000456583	-2.12296	0.247147	0.141339	1.18686	0.687224	0.00551579	1.61018	-0.348114	0.039322	-1.2729	-0.198913	0.15475	-1.14783	Putative uncharacterized protein Sb04g004820 n=2 Tax=Andropogoneae RepID=C5XW52_SORBI	cDNA copper-transporting ATPase, putative, expressed	RAN1 (RESPONSIVE-TO-ANTAGONIST 1); ATPase, coupled to transmembrane movement of ions, phosphorylative mechanism / copper ion tr
RAN	Ta.17942.1.S1_at	0.326285	0.0276364	1.25378	0.0670007	0.482636	1.04754	-0.259284	0.00793979	-1.19688	0.0658964	0.220144	1.04673	-0.00660354	0.921296	-1.00459	-0.0724999	0.26832	-1.05154	0.177	0.125926	1.13053	-0.0833888	0.198219	-1.0595	0.103395	0.133826	1.0743	0.0955525	0.135282	1.06848	Putative uncharacterized protein n=1 Tax=Zea mays RepID=B4G0T0_MAIZE	cDNA copper-transporting ATPase, putative, expressed	HMA5 (HEAVY METAL ATPASE 5); ATPase, coupled to transmembrane movement of ions, phosphorylative mechanism
RTE	TaAffx.58832.1.S1_at	0.754139	0.0099852	1.68663	0.342272	0.173812	1.26775	-0.411867	0.0426022	-1.33041	1.38638	1.73296e-06	2.61422	0.743065	5.30164e-05	1.67373	-0.643317	4.63209e-05	-1.56192	0.209132	0.262655	1.15599	0.841375	5.00285e-05	1.79176	0.609925	0.0112503	1.52618	-0.267032	0.059859	-1.20333	Os01g0711600 protein n=2 Tax=Oryza sativa RepID=Q9ASD3_ORYSJ	cDNA green ripe-like, putative, expressed	RTE1 (REVERSION-TO-ETHYLENE SENSITIVITY1)
RTE	Ta.24477.1.S1_at	1.51915	2.04745e-05	2.86623	0.93938	0.000506983	1.9177	-0.579773	0.00091381	-1.49461	2.52932	1.2772e-06	5.773	2.27444	2.2101e-05	4.83809	-0.254883	0.0480252	-1.19324	0.0868116	0.34362	1.06202	1.09698	2.03553e-06	2.13906	1.42187	0.000197209	2.67933	-0.173783	0.128661	-1.12801	Os01g0711600 protein n=2 Tax=Oryza sativa RepID=Q9ASD3_ORYSJ	cDNA green ripe-like, putative, expressed	RTE1 (REVERSION-TO-ETHYLENE SENSITIVITY1)
ETR	TaAffx.59457.1.S1_at	0.410905	0.00541508	1.32952	-0.139659	0.0895235	-1.10164	-0.550563	0.000315915	-1.46466	0.31123	0.161897	1.24076	-0.184153	0.046136	-1.13615	-0.495383	0.0444047	-1.40969	-0.0787319	0.416986	-1.05609	-0.178406	0.3687	-1.13163	-0.123226	0.00524223	-1.08917	0.136438	0.114376	1.09919	Os03g0701700 protein n=4 Tax=Oryza sativa RepID=Q53RH0_ORYSJ	cDNA ethylene receptor, putative, expressed	ETR1 (ETHYLENE RESPONSE 1); ethylene binding / protein histidine kinase/ two-component response regulator
ETR	Ta.27490.1.S1_at	0.0355499	0.787004	1.02495	0.804135	0.0258607	1.7461	0.768586	0.0387485	1.7036	0.473531	0.035826	1.3885	0.200108	0.223556	1.14878	-0.273424	0.0274257	-1.20867	0.111876	0.477827	1.08063	0.549857	0.0146595	1.46394	-0.492152	0.0992252	-1.40654	-0.0854023	0.490557	-1.06098	Os03g0701700 protein n=4 Tax=Oryza sativa RepID=Q53RH0_ORYSJ	cDNA ethylene receptor, putative, expressed	ETR1 (ETHYLENE RESPONSE 1); ethylene binding / protein histidine kinase/ two-component response regulator
ERS	Ta.10139.1.S1_s_at	0.610002	0.00222883	1.52626	0.466636	0.00861101	1.38188	-0.143366	0.329283	-1.10448	0.526815	0.0638216	1.44074	0.31962	0.238322	1.248	-0.207195	0.121282	-1.15444	0.0210006	0.923966	1.01466	-0.0621866	0.52202	-1.04405	-0.126015	0.422887	-1.09127	0.223634	0.160072	1.16767	Os03g0701700 protein n=4 Tax=Oryza sativa RepID=Q53RH0_ORYSJ	cDNA ethylene receptor, putative, expressed	ERS1 (ETHYLENE RESPONSE SENSOR 1); ethylene binding / protein histidine kinase/ receptor
ERS	Ta.10139.1.S1_at	0.425489	0.0188319	1.34303	0.246546	0.133096	1.18636	-0.178943	0.123109	-1.13205	0.453112	0.0661832	1.36899	0.221891	0.323427	1.16626	-0.231221	0.080706	-1.17383	0.00137287	0.99494	1.00095	0.0289955	0.656863	1.0203	-0.0232827	0.856877	-1.01627	0.127061	0.409181	1.09207	Os03g0701700 protein n=4 Tax=Oryza sativa RepID=Q53RH0_ORYSJ	cDNA ethylene receptor, putative, expressed	ERS1 (ETHYLENE RESPONSE SENSOR 1); ethylene binding / protein histidine kinase/ receptor
ERS	TaAffx.22824.1.S1_at	-0.472105	0.201449	-1.38713	-1.15503	0.0174022	-2.22689	-0.682925	0.010706	-1.60539	0.720505	0.00855149	1.64776	-0.461057	0.0743294	-1.37655	-1.18156	0.00135204	-2.26822	-0.183322	0.590684	-1.13549	1.00929	0.00191802	2.01292	0.510651	0.0331312	1.42469	0.196045	0.363032	1.14555	Putative uncharacterized protein Sb09g004300 n=1 Tax=Sorghum bicolor RepID=C5Z0J4_SORBI	cDNA ethylene receptor, putative, expressed	ERS1 (ETHYLENE RESPONSE SENSOR 1); ethylene binding / protein histidine kinase/ receptor
CTR	TaAffx.4129.1.S1_at	0.571283	0.00126632	1.48585	0.18353	0.185121	1.13566	-0.387753	0.0131762	-1.30835	0.60964	0.135696	1.52588	-0.324411	0.38134	-1.25215	-0.934051	6.52497e-05	-1.91063	-0.00559915	0.987419	-1.00389	0.0327573	0.21748	1.02296	-0.51354	0.00772928	-1.42755	0.0810916	0.302701	1.05782	Putative uncharacterized protein Sb02g011690 n=1 Tax=Sorghum bicolor RepID=C5X5W8_SORBI	cDNA CTR1-like protein kinase, putative, expressed	CTR1 (CONSTITUTIVE TRIPLE RESPONSE 1); kinase/ protein binding / protein serine/threonine kinase/ protein serine/threonine/tyrosine
CTR	TaAffx.63981.1.A1_at	0.369972	0.0273011	1.29233	1.59612	8.37762e-05	3.02329	1.22615	3.32473e-05	2.33941	0.240322	0.152369	1.18126	0.871826	0.00552643	1.82998	0.631504	0.00457934	1.54918	0.180505	0.317229	1.13328	0.0508553	0.527058	1.03588	-0.543787	0.00584449	-1.45779	0.392643	0.0303464	1.3128	Putative ethylene constitutive triple response protein n=1 Tax=Triticum aestivum RepID=B8K1X4_WHEAT	cDNA protein kinase domain containing protein, expressed	serine/threonine protein kinase, putative
CTR	TaAffx.110897.1.S1_at	0.387746	0.0746017	1.30835	1.13474	0.00255123	2.19579	0.746994	0.00906744	1.67829	0.711643	0.00226951	1.63767	0.758294	0.00319628	1.69149	0.0466505	0.514229	1.03286	-0.11904	0.495123	-1.08601	0.204858	0.128506	1.15257	-0.495486	0.02032	-1.40979	0.485853	0.00777189	1.40041	Os04g0610900 protein n=4 Tax=Oryza sativa RepID=Q7XPL1_ORYSJ	cDNA protein kinase domain containing protein, expressed	serine/threonine protein kinase, putative
CTR	TaAffx.36754.1.S1_at	0.368922	0.00405518	1.29139	-0.187177	0.0965655	-1.13853	-0.556098	0.00289247	-1.47029	0.572004	0.000351811	1.48659	-0.0434417	0.809228	-1.03057	-0.615446	0.0237878	-1.53203	-0.171129	0.0262181	-1.12594	0.0319538	0.63883	1.0224	-0.0273938	0.8881	-1.01917	0.0971719	0.59547	1.06967	Putative ethylene constitutive triple response protein n=1 Tax=Triticum aestivum RepID=B8K1X4_WHEAT	cDNA protein kinase domain containing protein, expressed	serine/threonine protein kinase, putative
TPR	Ta.6777.1.A1_at	-0.055725	0.414738	-1.03938	-0.68085	7.2387e-05	-1.60308	-0.625125	0.000624454	-1.54235	-0.732948	0.00203845	-1.66203	-1.3849	0.000385358	-2.61153	-0.65195	0.0014345	-1.57129	0.0947144	0.404257	1.06785	-0.582508	0.000760683	-1.49745	-0.609333	0.00193247	-1.52555	-0.451047	0.00455765	-1.36703	Os10g0486900 protein n=1 Tax=Oryza sativa Japonica Group RepID=Q7XD86_ORYSJ	cDNA tetratricopeptide repeat protein 1, putative, expressed	tetratricopeptide repeat (TPR)-containing protein
TPR	Ta.6777.3.A1_a_at	0.261751	0.0146541	1.19893	-0.814387	0.000831287	-1.75855	-1.07614	0.000332718	-2.10838	-0.0692854	0.620821	-1.0492	-1.08356	0.00135272	-2.11926	-1.01428	7.85807e-05	-2.01989	-0.191619	0.220316	-1.14204	-0.522656	0.000839977	-1.4366	-0.460795	0.00869931	-1.3763	-0.386517	0.00263139	-1.30723	Os10g0486900 protein n=1 Tax=Oryza sativa Japonica Group RepID=Q7XD86_ORYSJ	cDNA tetratricopeptide repeat protein 1, putative, expressed	tetratricopeptide repeat (TPR)-containing protein
EIN2	TaAffx.80450.1.S1_at	-0.232646	0.155999	-1.17499	-0.232469	0.205499	-1.17484	0.000176795	0.998646	1.00012	-0.37645	0.000265854	-1.29814	-0.234827	0.0315881	-1.17677	0.141623	0.143692	1.10315	-0.00515006	0.969479	-1.00358	-0.148955	0.0466686	-1.10877	-0.00750809	0.950529	-1.00522	0.00769685	0.932738	1.00535	Os07g0155600 protein n=5 Tax=Oryza sativa RepID=Q0D8I9_ORYSJ	cDNA ethylene-insensitive protein 2, putative, expressed	EIN2 (ETHYLENE INSENSITIVE 2); transporter
ECIP	Ta.6056.1.S1_at	0.0502963	0.688137	1.03548	-0.322273	0.0414084	-1.2503	-0.37257	0.0032777	-1.29466	0.213476	0.219195	1.15948	-0.61879	0.0398312	-1.53559	-0.832267	0.00457627	-1.78048	-0.136044	0.49182	-1.09889	0.0271364	0.627683	1.01899	-0.432561	0.0430957	-1.34963	0.13523	0.481587	1.09827	Os04g0482800 protein n=4 Tax=Oryza sativa RepID=Q0JCA4_ORYSJ	cDNA MA3 domain containing protein, expressed	MA3 domain-containing protein
ECIP	Ta.6056.3.S1_at	0.0952413	0.72314	1.06824	-0.520405	0.0915142	-1.43436	-0.615646	0.0316101	-1.53224	0.159855	0.497005	1.11718	-0.668188	0.0594238	-1.58908	-0.828043	0.00720895	-1.77528	-0.375336	0.263419	-1.29714	-0.310722	0.122488	-1.24033	-0.523119	0.0542048	-1.43706	0.0505549	0.768592	1.03566	Os04g0482800 protein n=4 Tax=Oryza sativa RepID=Q0JCA4_ORYSJ	cDNA MA3 domain containing protein, expressed	MA3 domain-containing protein
ECIP	TaAffx.112184.1.S1_at	-0.22094	0.182492	-1.16549	-0.307099	0.0789012	-1.23722	-0.0861596	0.132978	-1.06154	-0.144349	0.199383	-1.10523	-0.556612	0.01653	-1.47081	-0.412263	0.0203538	-1.33077	-0.0925922	0.589965	-1.06628	-0.0160012	0.769009	-1.01115	-0.342105	0.0342756	-1.26761	0.132482	0.353019	1.09618	Topoisomerase-like protein n=2 Tax=Andropogoneae RepID=B6SW65_MAIZE	cDNA MA3 domain containing protein, expressed	MA3 domain-containing protein
ECIP	Ta.6373.1.S1_at	0.678166	0.0061779	1.6001	0.722355	0.00368499	1.64987	0.0441896	0.425069	1.0311	0.133565	0.651511	1.097	0.564245	0.144233	1.47861	0.43068	0.0449832	1.34787	0.0369318	0.907411	1.02593	-0.507669	0.000611407	-1.42175	-0.121179	0.46113	-1.08762	0.935818	0.00395995	1.91298	Os08g0120500 protein n=2 Tax=Oryza sativa RepID=Q6YPF2_ORYSJ	cDNA MA3 domain containing protein, expressed	MA3 domain-containing protein
EIN5	Ta.2712.3.A1_at	0.0277897	0.798485	1.01945	-0.0989367	0.436653	-1.07098	-0.126726	0.155303	-1.09181	0.110073	0.407651	1.07928	-0.071047	0.678996	-1.05048	-0.18112	0.266176	-1.13376	-0.0379649	0.797131	-1.02666	0.0443182	0.58098	1.0312	-0.0100752	0.945901	-1.00701	-0.120337	0.412008	-1.08699	Os03g0794800 protein n=5 Tax=Oryza sativa RepID=Q6F378_ORYSJ	cDNA XRN 5'-3' exonuclease N-terminus domain containing protein, expressed
EIN5	Ta.2712.2.S1_at	0.112376	0.430751	1.08101	-0.194681	0.183287	-1.14447	-0.307057	0.0121296	-1.23718	-0.431568	0.00639325	-1.3487	-1.11906	0.00318307	-2.17205	-0.687489	0.0190094	-1.61048	0.351682	0.0488822	1.27605	-0.192263	0.0906168	-1.14255	-0.572695	0.0299186	-1.4873	-0.0918861	0.62184	-1.06576	Os03g0794800 protein n=5 Tax=Oryza sativa RepID=Q6F378_ORYSJ	cDNA XRN 5'-3' exonuclease N-terminus domain containing protein, expressed	XRN4 (EXORIBONUCLEASE 4); 5'-3' exonuclease/ 5'-3' exoribonuclease/ nucleic acid binding
EIN5	Ta.27926.2.S1_at	-0.00283112	0.977485	-1.00196	-0.713979	0.00155898	-1.64032	-0.711148	7.92607e-05	-1.63711	0.0637568	0.779446	1.04518	-0.692828	0.0378491	-1.61645	-0.756585	0.00111839	-1.68949	-0.0805246	0.742133	-1.0574	-0.0139367	0.774191	-1.00971	-0.0593738	0.542768	-1.04201	-0.153333	0.162483	-1.11214	Os03g0794800 protein n=5 Tax=Oryza sativa RepID=Q6F378_ORYSJ	cDNA XRN 5'-3' exonuclease N-terminus domain containing protein, expressed	XRN4 (EXORIBONUCLEASE 4); 5'-3' exonuclease/ 5'-3' exoribonuclease/ nucleic acid binding
EIN5	Ta.27926.3.S1_a_at	-0.625077	0.000979552	-1.54229	-0.690399	0.000204426	-1.61373	-0.0653221	0.410344	-1.04632	-0.521173	0.00106186	-1.43512	-0.583927	0.02266	-1.49892	-0.0627533	0.702785	-1.04446	-0.146111	0.102495	-1.10658	-0.042207	0.550348	-1.02969	-0.0396382	0.811744	-1.02786	-0.213897	0.246178	-1.15982	Os03g0794800 protein n=5 Tax=Oryza sativa RepID=Q6F378_ORYSJ	cDNA XRN 5'-3' exonuclease N-terminus domain containing protein, expressed	XRN4 (EXORIBONUCLEASE 4); 5'-3' exonuclease/ 5'-3' exoribonuclease/ nucleic acid binding
EIN5	Ta.3954.2.S1_a_at	0.379525	0.0458471	1.30091	-0.0109723	0.950264	-1.00763	-0.390498	0.073761	-1.31085	1.07789	0.0112774	2.11094	0.0804391	0.759748	1.05734	-0.997447	1.54698e-05	-1.99646	-0.129964	0.644494	-1.09427	0.568397	0.00336247	1.48287	-0.0385529	0.796756	-1.02708	0.304261	0.00205981	1.23479	Os01g0872700 protein n=3 Tax=Oryza sativa RepID=Q5N739_ORYSJ	cDNA XRN 5'-3' exonuclease N-terminus domain containing protein, expressed	XRN3; 5'-3' exoribonuclease
EIN5	TaAffx.105545.1.S1_at	0.217202	0.170212	1.16248	-0.194963	0.0827628	-1.1447	-0.412165	0.0219376	-1.33068	0.479757	0.0560994	1.39451	-0.253391	0.199242	-1.192	-0.733148	0.00659284	-1.66226	0.00051314	0.997587	1.00036	0.263068	0.163933	1.20003	-0.0579144	0.573225	-1.04096	-0.249014	0.0734257	-1.1884	Putative uncharacterized protein Sb03g010040 n=1 Tax=Sorghum bicolor RepID=C5XGF0_SORBI	cDNA XRN 5'-3' exonuclease N-terminus domain containing protein, expressed	XRN3; 5'-3' exoribonuclease
EIN3	Ta.9677.2.S1_at	0.226692	0.30665	1.17015	-0.211678	0.381415	-1.15803	-0.43837	0.0452424	-1.35507	1.20765	1.66967e-06	2.30961	0.284171	0.322287	1.21771	-0.923479	0.0212003	-1.89668	-0.440407	0.0664939	-1.35699	0.540551	0.00320895	1.45453	0.0554417	0.853155	1.03918	0.0626295	0.828882	1.04437	Ethylene-insensitive-3-like protein n=5 Tax=Oryza sativa RepID=Q8W3M0_ORYSJ	cDNA ethylene-insensitive 3, putative	EIL1 (ETHYLENE-INSENSITIVE3-LIKE 1); transcription factor/ transcription regulator
EIN3	Ta.9677.2.S1_x_at	0.242419	0.19332	1.18297	-0.175565	0.337567	-1.12941	-0.417984	0.0408686	-1.33606	1.20957	0.0017637	2.31269	0.417169	0.179076	1.3353	-0.792401	0.0170289	-1.73195	-0.471295	0.0806945	-1.38635	0.495856	0.00716737	1.41016	0.121438	0.618182	1.08782	0.119716	0.651911	1.08652	Ethylene-insensitive-3-like protein n=5 Tax=Oryza sativa RepID=Q8W3M0_ORYSJ	cDNA ethylene-insensitive 3, putative	EIL1 (ETHYLENE-INSENSITIVE3-LIKE 1); transcription factor/ transcription regulator
EIN3	TaAffx.110715.1.S1_at	-0.00626198	0.980159	-1.00435	-0.358528	0.211268	-1.28212	-0.352266	0.00176114	-1.27656	0.312541	0.0149279	1.24189	-0.167181	0.409596	-1.12286	-0.479723	0.050372	-1.39448	-0.130403	0.623705	-1.0946	0.1884	0.00797788	1.1395	0.0609435	0.745872	1.04315	-0.122039	0.526084	-1.08827	ETHYLENE-INSENSITIVE3-like 1 protein n=5 Tax=Andropogoneae RepID=B6U809_MAIZE	cDNA ethylene-insensitive 3, putative
EIN3	TaAffx.110715.1.S1_x_at	0.387833	0.0344348	1.30843	-0.221138	0.058791	-1.16565	-0.608971	0.00669705	-1.52517	0.597963	0.000348298	1.51358	-0.299179	0.0204231	-1.23044	-0.897142	0.000448129	-1.86237	0.00556626	0.942245	1.00387	0.215696	0.128368	1.16126	-0.072474	0.47258	-1.05152	-0.250701	0.15027	-1.18979	ETHYLENE-INSENSITIVE3-like 1 protein n=5 Tax=Andropogoneae RepID=B6U809_MAIZE	cDNA ethylene-insensitive 3, putative
EIN3	TaAffx.64208.1.A1_at	2.06246	7.7129e-05	4.17697	2.07542	0.000249868	4.21466	0.0129587	0.917081	1.00902	2.79039	5.42574e-05	6.91817	2.46124	0.000148835	5.5069	-0.329151	0.0288839	-1.25627	0.211813	0.334874	1.15814	0.939746	2.18426e-05	1.91819	0.597637	0.0153803	1.51324	0.145734	0.2884	1.10629	Putative uncharacterized protein n=1 Tax=Zea mays RepID=B4FJ06_MAIZE	cDNA ethylene-insensitive 3, putative, expressed
EIN3	TaAffx.83569.1.S1_at	0.830487	0.0122202	1.77829	0.585224	0.0484692	1.50027	-0.245263	0.0899289	-1.18531	1.63169	0.000268409	3.09876	1.13823	0.00241397	2.20111	-0.493458	0.0207676	-1.40782	-0.407527	0.136688	-1.32641	0.393675	0.00852832	1.31374	0.14548	0.393684	1.1061	0.327658	0.380202	1.25497	Os08g0508700 protein n=1 Tax=Oryza sativa Japonica Group RepID=Q6YVT1_ORYSJ	protein ethylene-insensitive 3, putative, expressed
EBF	Ta.13279.2.S1_a_at	0.37992	0.189884	1.30127	-0.461829	0.130053	-1.37729	-0.841748	0.000232123	-1.79222	1.98296	0.000190602	3.95302	0.495846	0.161856	1.41015	-1.48711	0.00386551	-2.80327	-0.483652	0.160011	-1.39828	1.11939	1.23257e-05	2.17254	0.474023	0.134201	1.38898	0.286251	0.39286	1.21947	EIN3-binding F-box protein n=1 Tax=Brachypodium distachyon RepID=C3SAA8_BRADI	cDNA OsFBL30 - F-box domain and LRR containing protein, expressed	EBF1 (EIN3-BINDING F BOX PROTEIN 1); protein binding / ubiquitin-protein ligase
EBF	Ta.13279.1.S1_a_at	-0.307398	0.011802	-1.23747	-0.447447	0.00178326	-1.36363	-0.140049	0.0992812	-1.10194	0.951342	0.000115386	1.93367	0.000254077	0.99809	1.00018	-0.951088	0.000646562	-1.93333	-0.201274	0.0368999	-1.14971	1.05747	0.00010169	2.08127	0.246427	0.0633885	1.18627	0.199292	0.170824	1.14813	EIN3-binding F-box protein n=1 Tax=Brachypodium distachyon RepID=C3SAA8_BRADI	cDNA OsFBL30 - F-box domain and LRR containing protein, expressed	EBF1 (EIN3-BINDING F BOX PROTEIN 1); protein binding / ubiquitin-protein ligase
EER	Ta.5517.1.S1_a_at	1.59536	3.05919e-06	3.0217	1.43405	3.67835e-05	2.70205	-0.161306	0.115077	-1.1183	2.12718	4.38633e-06	4.36864	2.45636	7.39181e-06	5.48832	0.329181	0.0073543	1.2563	0.103354	0.151322	1.07427	0.635178	0.000186932	1.55313	1.12567	0.000255314	2.18202	0.372747	0.047478	1.29482	Os02g0580500 protein n=2 Tax=Oryza sativa RepID=Q6EP40_ORYSJ	cDNA mitochondrial prohibitin complex protein 1, putative, expressed	ATPHB3 (PROHIBITIN 3)
EER	Ta.5517.1.S1_at	1.91559	0.000847492	3.77267	1.5327	0.00189623	2.89328	-0.382883	0.00312152	-1.30394	2.70468	0.000102037	6.51912	2.70593	0.000109177	6.52477	0.00125123	0.983986	1.00087	-0.156576	0.592099	-1.11464	0.632514	0.000430927	1.55026	1.01665	6.96383e-05	2.02321	0.230416	0.19101	1.17317	Os02g0580500 protein n=2 Tax=Oryza sativa RepID=Q6EP40_ORYSJ	cDNA mitochondrial prohibitin complex protein 1, putative, expressed	ATPHB3 (PROHIBITIN 3)
EER	Ta.27514.1.S1_at	0.0352992	0.792897	1.02477	-0.406665	0.0132957	-1.32562	-0.441964	0.0344171	-1.35845	-0.0332831	0.88735	-1.02334	-0.355243	0.177467	-1.2792	-0.32196	0.0109358	-1.25003	0.0629251	0.788324	1.04458	-0.00565725	0.966891	-1.00393	0.114347	0.27998	1.08248	0.0584683	0.457402	1.04136	Prohibitin n=3 Tax=Andropogoneae RepID=B6TP36_MAIZE	cDNA prohibitin, putative, expressed	ATPHB3 (PROHIBITIN 3)
EER	Ta.5517.2.A1_a_at	0.052979	0.557089	1.0374	-0.30974	0.0645274	-1.23948	-0.362719	0.0566114	-1.28585	0.661824	0.00407333	1.58208	0.729242	0.0261688	1.65777	0.0674179	0.730642	1.04784	0.312072	0.0552771	1.24149	0.920918	0.000266297	1.89332	1.35105	0.00327193	2.55099	0.465007	0.169892	1.38032	Prohibitin n=4 Tax=Andropogoneae RepID=Q9M587_MAIZE	cDNA mitochondrial prohibitin complex protein 1, putative, expressed	ATPHB4 (PROHIBITIN 4)
EER	Ta.14391.1.S1_at	1.01801	0.00032232	2.02513	0.783502	0.00197785	1.7213	-0.23451	0.0524105	-1.17651	1.21531	0.000105916	2.32191	1.27151	0.000104973	2.41414	0.0561937	0.0868884	1.03972	0.315689	0.0471126	1.24461	0.512992	0.000233992	1.42701	0.803695	0.000538264	1.74557	0.0310006	0.828798	1.02172	Prohibitin n=3 Tax=Andropogoneae RepID=B6TP36_MAIZE	cDNA prohibitin, putative, expressed	ATPHB4 (PROHIBITIN 4)
EER	TaAffx.29103.1.S1_at	0.293621	0.0970396	1.22571	-0.547177	0.00714593	-1.46122	-0.840798	0.00263316	-1.79104	0.487337	0.00768782	1.40185	-0.299725	0.278023	-1.23091	-0.787061	0.0228713	-1.72556	-0.359765	0.0488631	-1.28322	-0.166049	0.198334	-1.12198	-0.112312	0.648894	-1.08096	0.0672091	0.80113	1.04769	Putative uncharacterized protein Sb03g039720 n=3 Tax=Andropogoneae RepID=C5XPR9_SORBI	cDNA Transcription initiation factor TFIID subunit A containing protein, expressed	EER4 (ENHANCED ETHYLENE RESPONSE 4); DNA binding / transcription initiation factor
EER	Ta.7559.2.S1_a_at	-0.0060236	0.978001	-1.00418	-0.689286	0.017045	-1.61248	-0.683262	0.0170758	-1.60577	0.135401	0.548723	1.0984	-0.747621	0.0402988	-1.67902	-0.883022	0.00430981	-1.84423	-0.0912318	0.733694	-1.06528	0.0501928	0.754608	1.0354	-0.149567	0.441087	-1.10924	0.310582	0.178713	1.24021	Os09g0386400 protein n=5 Tax=Poaceae RepID=Q6H592_ORYSJ	cDNA proteasome subunit, putative, expressed	EER5 (ENHANCED ETHYLENE RESPONSE 5)
ERF	Ta.1136.1.S1_at	-0.197196	0.00300529	-1.14647	-0.66828	5.22677e-06	-1.58918	-0.471083	0.000114858	-1.38615	-0.463427	0.0166145	-1.37881	-0.838781	0.00707021	-1.78854	-0.375354	0.0362248	-1.29716	-0.237078	0.109051	-1.1786	-0.503308	0.000151961	-1.41746	-0.407579	0.0272187	-1.32646	0.48464	0.12613	1.39924	Ethylene-responsive element binding protein 1 n=5 Tax=Triticum aestivum RepID=Q2TN80_WHEAT	cDNA AP2 domain containing protein, expressed	RAP2.12; DNA binding / transcription factor
ERF	Ta.2344.1.S1_s_at	1.05004	9.33861e-05	2.07058	0.474007	0.00243439	1.38896	-0.576027	0.00091987	-1.49074	1.72633	0.000199339	3.30884	1.28251	0.00439367	2.43261	-0.443822	0.0691447	-1.3602	-0.189433	0.246528	-1.14032	0.48686	0.000581408	1.40139	0.619065	0.0286727	1.53588	0.393412	0.133673	1.3135	Os09g0434500 protein n=5 Tax=Oryza sativa RepID=Q69PH3_ORYSJ	cDNA AP2 domain containing protein, expressed	RAP2.12; DNA binding / transcription factor
ERF	TaAffx.70539.1.A1_at	1.07611	0.000135916	2.10834	0.44073	0.000478075	1.35729	-0.635376	0.00103916	-1.55334	1.45706	0.000248218	2.74549	1.20007	0.0108672	2.29751	-0.256991	0.355068	-1.19498	-0.0490791	0.692216	-1.0346	0.331877	0.0137693	1.25865	0.710263	0.0439055	1.6361	0.339067	0.258412	1.26494	Os09g0434500 protein n=5 Tax=Oryza sativa RepID=Q69PH3_ORYSJ	cDNA AP2 domain containing protein, expressed	RAP2.12; DNA binding / transcription factor
ERF	TaAffx.71051.1.S1_at	0.396888	0.262776	1.31666	0.561787	0.121223	1.4761	0.164899	0.349381	1.12109	0.535092	0.00552749	1.44904	1.62303	0.000141293	3.08021	1.08794	0.000505945	2.1257	0.0328592	0.913658	1.02304	0.171064	0.308521	1.12589	1.0941	0.000753005	2.1348	0.779003	0.000816163	1.71594	Os03g0198500 protein n=2 Tax=Oryza sativa RepID=Q10QF4_ORYSJ	cDNA ethylene-responsive element-binding protein, putative, expressed	unknown protein
MPK3	Ta.236.1.S1_at	1.70769	5.49966e-05	3.26637	1.71006	9.35477e-06	3.27174	0.00237215	0.982453	1.00165	2.01322	8.3086e-05	4.03682	1.89596	0.000412677	3.72169	-0.117259	0.415357	-1.08467	-0.0828669	0.545454	-1.05912	0.222664	0.0721945	1.16689	0.103033	0.491452	1.07403	0.0586478	0.682349	1.04149	Mitogen-activated protein kinase 5 n=10 Tax=Poaceae RepID=MPK5_ORYSJ	cDNA CGMC_MAPKCGMC_2_ERK.2 - CGMC includes CDA, MAPK, GSK3, and CLKC kinases, expressed	ATMPK3 (ARABIDOPSIS THALIANA MITOGEN-ACTIVATED PROTEIN KINASE 3); MAP kinase/ kinase/ protein binding / protein kinase
MPK6	Ta.23916.1.S1_at	0.422353	0.274573	1.34011	-0.234326	0.530735	-1.17636	-0.656679	0.00210126	-1.57645	0.937859	0.00022585	1.91568	0.50407	0.096965	1.41821	-0.433789	0.135848	-1.35078	-0.34059	0.36787	-1.26627	0.174916	0.0542981	1.1289	0.397807	0.175611	1.3175	0.587255	0.118832	1.50239	Mitogen-activated protein kinase n=1 Tax=Triticum aestivum RepID=Q84XZ3_WHEAT	cDNA CGMC_MAPKCMGC_2_ERK.12 - CGMC includes CDA, MAPK, GSK3, and CLKC kinases, expressed	ATMPK6 (ARABIDOPSIS THALIANA MAP KINASE 6); MAP kinase/ kinase
MPK6	Ta.23916.1.S2_s_at	0.522159	0.000724583	1.4361	-0.00449673	0.966885	-1.00312	-0.526656	0.0048052	-1.44059	0.646153	1.9211e-06	1.56499	0.182554	0.019492	1.13489	-0.463599	0.000728194	-1.37898	0.110792	0.0894338	1.07982	0.234785	0.00138529	1.17673	0.297842	0.0422249	1.22931	0.208676	0.0531107	1.15563	Mitogen-activated protein kinase n=1 Tax=Triticum aestivum RepID=Q84XZ3_WHEAT	cDNA CGMC_MAPKCMGC_2_ERK.12 - CGMC includes CDA, MAPK, GSK3, and CLKC kinases, expressed	ATMPK6 (ARABIDOPSIS THALIANA MAP KINASE 6); MAP kinase/ kinase

## Sheet: CK metabolism
Table S2. Changes in the expression of cytokinin metabolism related probesets between dormant and after-ripened seeds in both dry and imbibed states
		D-12/D-0			D-24/D-0			D-24/D-12			AR-12/AR-0			AR-24/AR-0			AR-24/AR-12			AR-0/D-0			AR-12/D-12			AR-24/D-24			AR-24/AR-24+ABA			Annotation
Gene	Probeset	Log2 FC	P-value	Linear FC	Log2 FC	P-value	Linear FC	Log2 FC	P-value	Linear FC	Log2 FC	P-value	Linear FC	Log2 FC	P-value	Linear FC	Log2 FC	P-value	Linear FC	Log2 FC	P-value	Linear FC	Log2 FC	P-value	Linear FC	Log2 FC	P-value	Linear FC	Log2 FC	P-value	Linear FC	UniProt Desc	Rice 6 Desc	Arab. Desc
IPT	Ta.27062.1.S1_at	-0.179823	0.0627358	-1.13274	-0.149586	0.299113	-1.10925	0.0302364	0.798525	1.02118	-0.31349	0.106223	-1.24271	-0.416576	0.139475	-1.33476	-0.103086	0.575672	-1.07407	0.116168	0.517388	1.08385	-0.0174988	0.581852	-1.0122	-0.150821	0.493374	-1.1102	-0.344729	0.112887	-1.26991	Putative uncharacterized protein Sb01g003950 n=1 Tax=Sorghum bicolor RepID=C5WW13_SORBI	cDNA IPP transferase, putative, expressed	IPT5; ATP binding / tRNA isopentenyltransferase/ transferase, transferring alkyl or aryl (other than methyl) groups
IPT	Ta.27550.1.S1_at	0.0303542	0.552973	1.02126	-0.133289	0.283758	-1.09679	-0.163643	0.217968	-1.12011	-0.365429	0.089916	-1.28826	-0.873737	0.00426506	-1.8324	-0.508309	0.00183324	-1.42238	-0.0127609	0.93679	-1.00888	-0.408544	0.00670464	-1.32734	-0.753209	0.00201802	-1.68554	-0.010868	0.763312	-1.00756	Isopentenyl transferase n=1 Tax=Triticum aestivum RepID=C6KF99_WHEAT	cDNA IPP transferase, putative, expressed	ATIPT2 (TRNA ISOPENTENYLTRANSFERASE 2); adenylate dimethylallyltransferase/ tRNA isopentenyltransferase
LOG	Ta.10410.1.S1_at	-0.103288	0.283031	-1.07422	-0.748615	0.0020819	-1.68018	-0.645326	0.00391388	-1.56409	-0.747756	0.0269835	-1.67918	-1.06624	0.00393624	-2.09397	-0.318483	0.0681517	-1.24702	0.268026	0.224763	1.20416	-0.376441	0.0565534	-1.29814	-0.049598	0.609418	-1.03498	-0.388493	0.000179778	-1.30903	Os01g0588900 protein n=2 Tax=Oryza sativa RepID=Q5ZC82_ORYSJ	cDNA uncharacterized protein PA4923, putative, expressed	Encodes a protein of unknown function. It has been crystallized and shown to be structurally almost identical to the protein e
LOG	TaAffx.92200.1.A1_s_at	-0.0480398	0.822901	-1.03386	-0.6665	0.0749882	-1.58722	-0.61846	0.0967151	-1.53524	-0.540014	0.00538723	-1.45399	-1.16402	0.000731332	-2.24081	-0.624005	0.00309695	-1.54115	0.603863	0.0199414	1.51978	0.111889	0.511753	1.08064	0.106344	0.702715	1.0765	-0.353481	0.0724619	-1.27764	Os01g0588900 protein n=2 Tax=Oryza sativa RepID=Q5ZC82_ORYSJ	cDNA uncharacterized protein PA4923, putative, expressed	Encodes a protein of unknown function. It has been crystallized and shown to be structurally almost identical to the protein e
LOG	TaAffx.12490.1.S1_at	0.575142	0.0455411	1.48982	-0.00737899	0.882874	-1.00513	-0.582521	0.0433751	-1.49746	0.573934	0.0481999	1.48858	0.420318	0.0928715	1.33822	-0.153616	0.285088	-1.11235	0.434642	0.0738157	1.35157	0.433434	0.122483	1.35044	0.862339	0.000390841	1.81798	-0.232945	0.0551164	-1.17523	Os03g0109300 protein n=1 Tax=Oryza sativa Japonica Group RepID=Q8H7U8_ORYSJ	cDNA possible lysine decarboxylase domain containing protein, expressed	Encodes a protein of unknown function. It has been crystallized and shown to be structurally almost identical to the protein e
LOG	TaAffx.52819.1.S1_at	0.406788	0.00818536	1.32573	-0.006109	0.956194	-1.00424	-0.412897	0.0050437	-1.33136	0.443643	0.0135809	1.36004	1.22281	0.158467	2.33401	0.77917	0.331137	1.71614	-0.0623569	0.608694	-1.04417	-0.0255013	0.746559	-1.01783	1.16657	0.173393	2.24477	0.979425	0.249207	1.97168	Os05g0541200 protein n=2 Tax=Oryza sativa RepID=Q5TKP8_ORYSJ	cDNA possible lysine decarboxylase domain containing protein, expressed	protein homodimerization
LOG	TaAffx.92200.1.A1_at	0.116392	0.263278	1.08402	-0.558515	0.0159816	-1.47275	-0.674907	0.00403326	-1.59649	0.1223	0.454389	1.08847	-0.651894	0.0309345	-1.57123	-0.774194	0.00605607	-1.71023	-0.0377692	0.830856	-1.02652	-0.0318614	0.550423	-1.02233	-0.131149	0.502874	-1.09516	-0.114967	0.489108	-1.08295	Putative uncharacterized protein n=1 Tax=Zea mays RepID=C4JAR1_MAIZE	cDNA uncharacterized protein PA4923, putative, expressed	unknown protein
CKX	Ta.24307.1.A1_at	-0.127834	0.221486	-1.09265	-0.327285	0.0225491	-1.25465	-0.19945	0.0326033	-1.14826	-0.0815074	0.51668	-1.05812	-0.0806065	0.496431	-1.05746	0.000900928	0.986395	1.00063	-0.161631	0.285848	-1.11855	-0.115304	0.131786	-1.0832	0.0850472	0.171005	1.06072	0.104287	0.126075	1.07496	Cytokinin oxidase (Fragment) n=2 Tax=Triticum aestivum RepID=C6YB61_WHEAT	cDNA cytokinin dehydrogenase precursor, putative, expressed	CKX5 (CYTOKININ OXIDASE 5); cytokinin dehydrogenase
CKX	Ta.24307.1.S1_at	0.314493	0.00410422	1.24357	-0.0680748	0.443484	-1.04832	-0.382568	0.00549007	-1.30366	0.133403	0.235149	1.09688	-0.11812	0.269696	-1.08532	-0.251523	0.00147161	-1.19046	0.0601952	0.587893	1.04261	-0.120894	0.0352803	-1.08741	0.0101503	0.886679	1.00706	0.167909	0.0230385	1.12343	Cytokinin oxidase (Fragment) n=2 Tax=Triticum aestivum RepID=C6YB61_WHEAT	cDNA cytokinin dehydrogenase precursor, putative, expressed	CKX5 (CYTOKININ OXIDASE 5); cytokinin dehydrogenase
CKX	Ta.4850.1.A1_at	0.428092	0.012374	1.34545	0.315955	0.0218729	1.24484	-0.112137	0.170648	-1.08083	0.471117	0.201906	1.38618	0.663663	0.0993167	1.5841	0.192547	0.0466855	1.14278	0.0583022	0.862686	1.04124	0.101327	0.233218	1.07276	0.40601	0.00287318	1.32502	0.19829	0.0673578	1.14734	Putative uncharacterized protein n=1 Tax=Oryza sativa Indica Group RepID=B8BBB8_ORYSI	cDNA cytokinin dehydrogenase precursor, putative, expressed	CKX7 (CYTOKININ OXIDASE 7); cytokinin dehydrogenase/ oxidoreductase
CKX	Ta.4850.1.A1_s_at	1.0822	0.00792614	2.11727	0.854697	0.0196109	1.80838	-0.227506	0.0654026	-1.17081	1.17498	6.65542e-05	2.25791	2.05504	0.000201367	4.15557	0.88006	0.00547043	1.84045	-0.0813536	0.728207	-1.05801	0.0114289	0.883946	1.00795	1.11899	0.00272876	2.17196	0.851658	0.00647555	1.80457	Putative uncharacterized protein n=1 Tax=Oryza sativa Indica Group RepID=B8BBB8_ORYSI	cDNA cytokinin dehydrogenase precursor, putative, expressed	CKX7 (CYTOKININ OXIDASE 7); cytokinin dehydrogenase/ oxidoreductase
CKX	Ta.4850.1.A1_x_at	0.45656	0.000467134	1.37227	0.15601	0.122805	1.1142	-0.30055	0.0254339	-1.23161	0.587477	0.0136136	1.50262	0.634794	0.018833	1.55272	0.0473168	0.644893	1.03334	-0.0923023	0.544408	-1.06607	0.0386145	0.428503	1.02713	0.386481	0.0329194	1.3072	0.118302	0.379412	1.08546	Putative uncharacterized protein n=1 Tax=Oryza sativa Indica Group RepID=B8BBB8_ORYSI	cDNA cytokinin dehydrogenase precursor, putative, expressed	CKX7 (CYTOKININ OXIDASE 7); cytokinin dehydrogenase/ oxidoreductase
CKX	Ta.7220.1.S1_at	0.141612	0.275837	1.10314	-0.336651	0.0665034	-1.26282	-0.478263	0.0239047	-1.39306	0.35341	0.0129216	1.27758	-0.124312	0.0916815	-1.08999	-0.477722	0.00754713	-1.39254	-0.142412	0.156027	-1.10375	0.069386	0.572666	1.04927	0.0699267	0.593569	1.04966	0.134901	0.405137	1.09802	Os10g0483500 protein n=2 Tax=Oryza sativa RepID=Q8LNV6_ORYSJ	cDNA cytokinin dehydrogenase precursor, putative, expressed	CKX1 (CYTOKININ OXIDASE/DEHYDROGENASE 1); cytokinin dehydrogenase
CKX	Ta.7220.2.A1_at	-0.203994	0.219512	-1.15188	-0.10422	0.521491	-1.07491	0.0997747	0.466265	1.07161	-0.080967	0.628122	-1.05773	0.461354	0.154806	1.37683	0.542321	0.0703877	1.45631	-0.0756955	0.707788	-1.05387	0.0473319	0.629414	1.03335	0.489878	0.107493	1.40433	0.219772	0.382752	1.16455	Putative uncharacterized protein Sb01g019000 n=1 Tax=Sorghum bicolor RepID=C5WYB9_SORBI	cDNA cytokinin dehydrogenase precursor, putative, expressed	CKX1 (CYTOKININ OXIDASE/DEHYDROGENASE 1); cytokinin dehydrogenase
CKX	Ta.8530.1.A1_at	-0.388683	0.167422	-1.3092	-0.188234	0.477179	-1.13937	0.200449	0.186272	1.14906	-0.377581	0.076745	-1.29916	-0.292753	0.136884	-1.22498	0.0848277	0.0340253	1.06056	0.146685	0.614465	1.10702	0.157787	0.117461	1.11557	0.0421658	0.698498	1.02966	-0.0506381	0.270757	-1.03572	Os01g0940000 protein n=2 Tax=Oryza sativa RepID=Q5JLP4_ORYSJ	cDNA cytokinin dehydrogenase precursor, putative, expressed	CKX1 (CYTOKININ OXIDASE/DEHYDROGENASE 1); cytokinin dehydrogenase
cZOG	Ta.16527.1.S1_at	0.284461	0.0832264	1.21795	-0.205994	0.0547644	-1.15348	-0.490455	0.0137353	-1.40489	0.152055	0.0111138	1.11115	-0.281847	0.0141554	-1.21575	-0.433902	0.00279685	-1.35088	0.0551876	0.455144	1.03899	-0.0772186	0.520332	-1.05498	-0.0206656	0.802855	-1.01443	-0.262828	0.0448471	-1.19983	UDP-glycosyltransferase UGT93B9 n=1 Tax=Avena strigosa RepID=C4MF51_9POAL	cDNA cis-zeatin O-glucosyltransferase, putative, expressed	UDP-glucoronosyl/UDP-glucosyl transferase family protein
cZOG	Ta.22120.1.S1_at	1.26813	9.52277e-05	2.40849	0.443584	0.0228805	1.35998	-0.824545	0.00268007	-1.77098	1.56261	1.35366e-05	2.95388	0.400974	0.0875253	1.3204	-1.16164	0.00325252	-2.23711	-0.0874478	0.230045	-1.06249	0.207036	0.0602759	1.15431	-0.130057	0.565147	-1.09434	-0.54093	0.0664181	-1.45491	Putative uncharacterized protein Sb03g004150 n=1 Tax=Sorghum bicolor RepID=C5XMU2_SORBI	cDNA cytokinin-O-glucosyltransferase 3, putative, expressed	DOGT1 (DON-GLUCOSYLTRANSFERASE 1); UDP-glycosyltransferase/ cis-zeatin O-beta-D-glucosyltransferase/ glucosyltransferase/ querc
cZOG	Ta.8495.1.A1_at	1.22576	0.00329368	2.33878	0.114064	0.438625	1.08227	-1.11169	0.00738247	-2.16099	2.36217	5.08065e-06	5.14143	0.419198	0.193093	1.33718	-1.94297	0.00209527	-3.84497	0.0665638	0.368196	1.04722	1.20298	0.00367289	2.30214	0.371698	0.271932	1.29388	-0.216485	0.49023	-1.1619	Os02g0578100 n=1 Tax=Oryza sativa Japonica Group RepID=UPI0000DF076C	cDNA cytokinin-O-glucosyltransferase 2, putative, expressed	AtUGT85A2 (UDP-glucosyl transferase 85A2); UDP-glycosyltransferase/ glucuronosyltransferase/ transferase, transferring glycosyl g
cZOG	TaAffx.17044.1.S1_at	-0.00818238	0.946541	-1.00569	0.734784	0.00597923	1.66415	0.742966	0.00382714	1.67361	1.37585	0.000836094	2.59521	3.42823	0.000313832	10.7647	2.05238	0.00142567	4.14789	-0.0337478	0.853668	-1.02367	1.35029	8.53718e-05	2.54963	2.6597	0.000656826	6.31901	1.15108	0.0227481	2.22081	UDP-glycosyltransferase UGT93B9 n=1 Tax=Avena strigosa RepID=C4MF51_9POAL	cDNA cis-zeatin O-glucosyltransferase, putative, expressed	UDP-glucoronosyl/UDP-glucosyl transferase family protein
cZOG	TaAffx.49246.1.A1_at	0.273773	0.000656	1.20897	-0.167207	0.451888	-1.12288	-0.44098	0.0935171	-1.35753	0.464853	0.0830118	1.38018	0.0419815	0.85009	1.02953	-0.422871	0.00284486	-1.34059	0.0472547	0.825587	1.0333	0.238334	0.00283522	1.17963	0.256443	0.285529	1.19453	-0.179571	0.0427937	-1.13255	Os02g0578100 n=1 Tax=Oryza sativa Japonica Group RepID=UPI0000DF076C	cDNA cytokinin-O-glucosyltransferase 2, putative, expressed	AtUGT85A5 (UDP-glucosyl transferase 85A5); glucuronosyltransferase/ transferase, transferring glycosyl groups
GLU	Ta.23909.1.S1_at	-0.949271	0.010035	-1.9309	-2.10228	8.27775e-05	-4.29387	-1.15301	0.00411346	-2.22377	-0.0266961	0.874556	-1.01868	0.0474734	0.827543	1.03345	0.0741696	0.738373	1.05276	-0.7809	0.00650612	-1.7182	0.141675	0.54181	1.10319	1.36885	0.00193406	2.58265	1.10609	0.00309715	2.15261	Beta-glucosidase n=2 Tax=Hordeum vulgare RepID=B5A496_HORVD	cDNA Os7bglu26 - beta-mannosidase/glucosidase/exoglucanase, expressed	BGLU44 (B-S GLUCOSIDASE 44); (R)-amygdalin beta-glucosidase/ 4-methylumbelliferyl-beta-D-glucopyranoside beta-glucosidase/ beta-g
GLU	Ta.23909.1.S1_x_at	-0.876912	0.0204094	-1.83644	-2.15585	0.000377716	-4.45633	-1.27894	0.0058166	-2.42661	-0.0228273	0.888651	-1.01595	0.0140815	0.957985	1.00981	0.0369088	0.88496	1.02591	-0.588951	0.0314325	-1.50415	0.265134	0.284036	1.20175	1.58099	0.00374721	2.99174	1.25182	0.00530226	2.38143	Beta-glucosidase n=2 Tax=Hordeum vulgare RepID=B5A496_HORVD	cDNA Os7bglu26 - beta-mannosidase/glucosidase/exoglucanase, expressed	BGLU44 (B-S GLUCOSIDASE 44); (R)-amygdalin beta-glucosidase/ 4-methylumbelliferyl-beta-D-glucopyranoside beta-glucosidase/ beta-g
GLU	Ta.24442.1.S1_at	0.552841	0.00115334	1.46697	-0.304785	0.00909437	-1.23523	-0.857625	9.5432e-05	-1.81205	0.511022	0.0455733	1.42506	-0.228132	0.269889	-1.17132	-0.739154	0.00183586	-1.6692	-0.0135902	0.940742	-1.00947	-0.0554086	0.535248	-1.03915	0.0630627	0.475588	1.04468	-0.224322	0.0634205	-1.16823
GLU	Ta.4601.2.S1_at	-0.694718	0.00286024	-1.61857	-0.226044	0.239929	-1.16962	0.468674	0.0371904	1.38384	-0.783397	7.73674e-05	-1.72118	2.81015	0.0154343	7.01357	3.59355	0.00656617	12.0716	-0.0418024	0.684176	-1.0294	-0.130481	0.122749	-1.09466	2.99439	0.0132485	7.96895	2.75252	0.0171085	6.73893	Beta-glucosidase n=4 Tax=Triticeae RepID=Q1XH04_WHEAT		BGLU13 (BETA GLUCOSIDASE 13); catalytic/ cation binding / hydrolase, hydrolyzing O-glycosyl compounds
GLU	TaAffx.58753.1.S1_at	-0.317927	0.00207958	-1.24654	-0.205361	0.0309262	-1.15298	0.112566	0.0792933	1.08115	-0.130047	0.0251621	-1.09433	-0.0173094	0.314238	-1.01207	0.112738	0.0300812	1.08128	-0.0455053	0.371455	-1.03205	0.142374	0.01788	1.10372	0.142546	0.0367449	1.10385	0.00342188	0.96767	1.00238	Beta-glucosidase, chloroplastic n=3 Tax=Zea mays RepID=BGLC_MAIZE		BGLU15 (BETA GLUCOSIDASE 15); catalytic/ cation binding / hydrolase, hydrolyzing O-glycosyl compounds
GLU	TaAffx.58753.2.S1_s_at	0.229885	0.0518201	1.17274	-0.100625	0.103345	-1.07224	-0.330509	0.0134571	-1.25746	0.233296	0.054878	1.17552	-0.0102442	0.919995	-1.00713	-0.24354	0.123701	-1.18389	-0.0746011	0.180176	-1.05307	-0.07119	0.558279	-1.05058	0.0157792	0.878304	1.011	-0.0554899	0.654911	-1.03921	Beta-glucosidase, chloroplastic n=3 Tax=Zea mays RepID=BGLC_MAIZE	cDNA Os6bglu24 - beta-glucosidase homologue, similar to G. max isohydroxyurate hydrolase, expressed	BGLU15 (BETA GLUCOSIDASE 15); catalytic/ cation binding / hydrolase, hydrolyzing O-glycosyl compounds
GLU	TaAffx.9117.1.S1_at	0.119428	0.463971	1.0863	-0.0642198	0.701848	-1.04552	-0.183648	0.165527	-1.13575	0.0868362	0.760189	1.06204	0.735772	0.124119	1.66529	0.648936	0.105921	1.56801	0.0775647	0.791943	1.05523	0.0449727	0.745636	1.03166	0.877557	0.0446123	1.83726	0.93813	0.0330689	1.91604	Beta-glucosidase n=4 Tax=Triticeae RepID=Q1XH04_WHEAT	cDNA Os6bglu24 - beta-glucosidase homologue, similar to G. max isohydroxyurate hydrolase, expressed	BGLU17 (BETA GLUCOSIDASE 17); catalytic/ cation binding / hydrolase, hydrolyzing O-glycosyl compounds

## Sheet: CK signalling
Table S2. Changes in the expression of cytokinin signaling related probesets between dormant and after-ripened seeds in both dry and imbibed states
		D-12/D-0			D-24/D-0			D-24/D-12			AR-12/AR-0			AR-24/AR-0			AR-24/AR-12			AR-0/D-0			AR-12/D-12			AR-24/D-24			AR-24/AR-24+ABA			Annotation
Gene	Probeset	Log2 FC	P-value	Linear FC	Log2 FC	P-value	Linear FC	Log2 FC	P-value	Linear FC	Log2 FC	P-value	Linear FC	Log2 FC	P-value	Linear FC	Log2 FC	P-value	Linear FC	Log2 FC	P-value	Linear FC	Log2 FC	P-value	Linear FC	Log2 FC	P-value	Linear FC	Log2 FC	P-value	Linear FC	UniProt Desc	Rice 6 Desc	Arab. Desc
AHK	TaAffx.97084.1.S1_at	0.842845	0.0631534	1.79358	0.00826765	0.976304	1.00575	-0.834577	0.02939	-1.78333	1.49903	0.00170244	2.82653	0.195905	0.391733	1.14544	-1.30313	0.000265191	-2.46764	-0.216319	0.51572	-1.16177	0.43987	0.138879	1.35648	-0.0286818	0.840643	-1.02008	0.376909	0.084259	1.29856	Histidine kinase n=7 Tax=Oryza sativa RepID=A1A696_ORYSJ	cDNA histidine kinase, putative, expressed	AHK3 (ARABIDOPSIS HISTIDINE KINASE 3); cytokinin receptor/ osmosensor/ protein histidine kinase
AHK	Ta.8903.1.A1_at	0.325721	0.156435	1.25329	0.470177	0.0288764	1.38528	0.144456	0.411907	1.10531	0.413929	0.0900559	1.33231	-0.0831199	0.733832	-1.05931	-0.497049	0.0255182	-1.41132	0.300275	0.242258	1.23138	0.388483	0.0573028	1.30902	-0.253022	0.176507	-1.1917	0.113809	0.466165	1.08208	Histidine kinase 2 n=1 Tax=Zea mays RepID=Q76H00_MAIZE	cDNA histidine kinase, putative, expressed	AHK3 (ARABIDOPSIS HISTIDINE KINASE 3); cytokinin receptor/ osmosensor/ protein histidine kinase
AHK	Ta.963.1.A1_at	1.19328	0.00382343	2.28672	1.66529	0.000190015	3.17178	0.472014	0.0735127	1.38705	0.78349	0.00914178	1.72129	1.19278	0.00550978	2.28592	0.409286	0.0562308	1.32803	0.61885	0.0287801	1.53565	0.209063	0.310288	1.15594	0.146335	0.442445	1.10675	0.374955	0.08595	1.2968	Cytokinin receptor CRE1b, putative, expressed n=3 Tax=Oryza sativa RepID=Q10DW1_ORYSJ	cDNA histidine kinase, putative, expressed	AHK3 (ARABIDOPSIS HISTIDINE KINASE 3); cytokinin receptor/ osmosensor/ protein histidine kinase
AHK	Ta.963.1.A1_x_at	1.28685	0.00121496	2.43995	1.29597	0.000229378	2.45541	0.00911246	0.962818	1.00634	1.03581	0.0314108	2.05027	0.842548	0.0722242	1.79322	-0.193265	0.290369	-1.14335	0.476328	0.20514	1.3912	0.225287	0.242999	1.16901	0.0229095	0.904053	1.01601	0.295225	0.140415	1.22708	Cytokinin receptor CRE1b, putative, expressed n=3 Tax=Oryza sativa RepID=Q10DW1_ORYSJ	cDNA histidine kinase, putative, expressed	AHK3 (ARABIDOPSIS HISTIDINE KINASE 3); cytokinin receptor/ osmosensor/ protein histidine kinase
AHP	TaAffx.61545.1.S1_at	0.26925	0.089072	1.20518	0.609377	0.00534888	1.5256	0.340127	0.00345751	1.26587	0.277905	0.103347	1.21243	0.306821	0.109305	1.23698	0.0289153	0.8567	1.02025	0.0650741	0.673194	1.04614	0.0737295	0.528789	1.05243	-0.237482	0.11626	-1.17893	0.231818	0.13488	1.17431	Histidine-containing phosphotransfer protein n=1 Tax=Triticum aestivum RepID=Q4VWF0_WHEAT	cDNA histidine-containing phosphotransfer protein, putative, expressed	AHP1 (HISTIDINE-CONTAINING PHOSPHOTRANSMITTER 1); histidine phosphotransfer kinase
AHP	TaAffx.84903.1.S1_at	-0.283513	0.0844985	-1.21715	-0.29486	0.0074522	-1.22677	-0.0113476	0.931296	-1.0079	-0.0508233	0.469426	-1.03586	-0.0941236	0.258436	-1.06742	-0.0433003	0.323846	-1.03047	-0.144022	0.127607	-1.10498	0.0886673	0.49288	1.06339	0.0567146	0.354667	1.04009	-0.00968411	0.942324	-1.00673	Histidine-containing phosphotransfer protein 1 n=2 Tax=Andropogoneae RepID=Q9SLX1_MAIZE	cDNA histidine-containing phosphotransfer protein, putative, expressed	AHP1 (HISTIDINE-CONTAINING PHOSPHOTRANSMITTER 1); histidine phosphotransfer kinase
AHP	TaAffx.80712.1.S1_at	1.36484	0.00466616	2.57547	-0.202125	0.118376	-1.15039	-1.56696	0.00208923	-2.9628	0.28806	0.232757	1.221	-0.811057	0.0161047	-1.7545	-1.09912	0.00015861	-2.14223	0.264807	0.292424	1.20148	-0.811971	0.0231989	-1.75561	-0.344124	0.00475413	-1.26938	-0.407573	0.0248219	-1.32645
ARR	TaAffx.68652.1.S1_at	-0.489332	0.0758745	-1.40379	-0.631498	0.0125273	-1.54917	-0.142167	0.383611	-1.10356	-0.0965149	0.763401	-1.06919	-0.591989	0.13599	-1.50732	-0.495474	0.0440281	-1.40978	-0.227378	0.515907	-1.17071	0.165438	0.392711	1.12151	-0.187869	0.258909	-1.13908	0.203224	0.333683	1.15127	Os02g0796500 protein n=2 Tax=Oryza sativa RepID=Q6K8X6_ORYSJ	cDNA two-component response regulator, putative, expressed	ARR1 (ARABIDOPSIS RESPONSE REGULATOR 1); transcription factor/ two-component response regulator
ARR	TaAffx.112134.1.S1_at	-0.197288	0.169638	-1.14654	-0.316568	0.0874853	-1.24536	-0.11928	0.311615	-1.08619	0.130265	0.350443	1.09449	-0.0324512	0.677927	-1.02275	-0.162716	0.191826	-1.11939	-0.246935	0.125916	-1.18668	0.0806174	0.514466	1.05747	0.0371812	0.709784	1.02611	0.0864742	0.0472508	1.06177	Response regulator 10 n=4 Tax=Andropogoneae RepID=Q948L2_MAIZE	cDNA two-component response regulator, putative, expressed	ARR1 (ARABIDOPSIS RESPONSE REGULATOR 1); transcription factor/ two-component response regulator
ARR	Ta.14705.2.S1_a_at	1.19754	0.00214644	2.29348	0.312002	0.128173	1.24143	-0.885537	0.00145111	-1.84745	2.07956	0.00169915	4.22678	1.02129	0.0263608	2.02973	-1.05827	0.00110997	-2.08243	-0.486609	0.191447	-1.40115	0.39541	0.0167223	1.31532	0.222678	0.179927	1.1669	0.292052	0.166053	1.22438	Os03g0224200 protein n=2 Tax=Oryza sativa RepID=Q8H7S7_ORYSJ	cDNA two-component response regulator, putative, expressed	ARR2 (ARABIDOPSIS RESPONSE REGULATOR 2); transcription factor/ two-component response regulator
ARR	Ta.14705.3.S1_a_at	0.952233	0.0137026	1.93487	0.0432764	0.851422	1.03045	-0.908956	0.00058577	-1.87769	1.95108	0.00157432	3.86665	0.73929	0.0993515	1.66935	-1.21179	0.00663473	-2.31626	-0.567346	0.162201	-1.4818	0.431505	0.00615207	1.34864	0.128667	0.617431	1.09328	0.543425	0.226274	1.45743	Os03g0224200 protein n=2 Tax=Oryza sativa RepID=Q8H7S7_ORYSJ	cDNA two-component response regulator, putative, expressed	ARR2 (ARABIDOPSIS RESPONSE REGULATOR 2); transcription factor/ two-component response regulator
ARR	TaAffx.53132.1.S1_at	1.32578	0.000142393	2.50668	0.287898	0.0565444	1.22086	-1.03788	5.71154e-05	-2.05321	2.07586	0.000152408	4.21595	0.547908	0.111015	1.46196	-1.52795	0.00255399	-2.88375	-0.508937	0.0420908	-1.423	0.241139	0.00150026	1.18193	-0.248926	0.344769	-1.18832	0.150352	0.654333	1.10984	Os02g0182100 protein n=2 Tax=Oryza sativa RepID=Q6H805_ORYSJ	cDNA two-component response regulator, putative, expressed	ARR12 (ARABIDOPSIS RESPONSE REGULATOR 12); transcription factor/ two-component response regulator
ARR	Ta.6529.2.S1_a_at	1.12396	0.00010467	2.17944	0.853189	0.000974615	1.80649	-0.270766	0.0709117	-1.20645	1.56935	0.0296149	2.96772	1.0097	0.112767	2.01349	-0.559658	0.0250565	-1.47392	-0.309827	0.549346	-1.23956	0.135571	0.124278	1.09853	-0.153321	0.446618	-1.11213	0.220503	0.292239	1.16514	Os02g0182100 protein n=2 Tax=Oryza sativa RepID=Q6H805_ORYSJ	cDNA two-component response regulator, putative, expressed	ARR12 (ARABIDOPSIS RESPONSE REGULATOR 12); transcription factor/ two-component response regulator
ARR	Ta.6529.2.S1_x_at	1.03638	0.000327248	2.05108	0.581292	0.0101765	1.49619	-0.455092	0.012219	-1.37087	1.68371	0.0168892	3.21253	1.00149	0.0894472	2.00207	-0.682221	0.00881408	-1.60461	-0.47456	0.335442	-1.38949	0.172765	0.0195679	1.12722	-0.0543637	0.766684	-1.0384	0.359906	0.150695	1.28334	Os02g0182100 protein n=2 Tax=Oryza sativa RepID=Q6H805_ORYSJ	cDNA two-component response regulator, putative, expressed	ARR12 (ARABIDOPSIS RESPONSE REGULATOR 12); transcription factor/ two-component response regulator
ARR	TaAffx.92416.1.S1_at	0.734279	0.00703818	1.66357	-0.228097	0.24255	-1.17129	-0.962376	0.000494327	-1.94852	0.807874	0.00252299	1.75063	-0.145885	0.412763	-1.10641	-0.953758	0.00152583	-1.93691	-0.134573	0.495089	-1.09777	-0.0609781	0.325512	-1.04317	-0.0523606	0.736253	-1.03696	0.0646514	0.622352	1.04583	Os02g0796500 protein n=2 Tax=Oryza sativa RepID=Q6K8X6_ORYSJ	cDNA two-component response regulator, putative, expressed	ARR12 (ARABIDOPSIS RESPONSE REGULATOR 12); transcription factor/ two-component response regulator
ARR	TaAffx.6013.1.S1_at	0.571183	0.0249081	1.48574	-0.350647	0.151794	-1.27513	-0.92183	0.00147891	-1.89452	0.625244	0.00471744	1.54247	-0.384361	0.00333892	-1.30528	-1.0096	0.000488543	-2.01336	-0.100464	0.587811	-1.07212	-0.0464037	0.660191	-1.03269	-0.134178	0.319758	-1.09747	-0.0565336	0.161974	-1.03996	Os02g0796500 protein n=2 Tax=Oryza sativa RepID=Q6K8X6_ORYSJ	cDNA two-component response regulator, putative, expressed	ARR12 (ARABIDOPSIS RESPONSE REGULATOR 12); transcription factor/ two-component response regulator
ARR	Ta.4054.2.S1_at	-0.0981147	0.58584	-1.07037	-0.103735	0.311021	-1.07455	-0.00562003	0.970006	-1.0039	0.115961	0.575623	1.0837	0.0849262	0.686664	1.06063	-0.0310353	0.76444	-1.02174	-0.142775	0.5172	-1.10403	0.0713011	0.664667	1.05066	0.0458859	0.5795	1.03232	0.186918	0.320707	1.13833	Putative uncharacterized protein Sb10g005580 n=1 Tax=Sorghum bicolor RepID=C5Z5H6_SORBI	cDNA two-component response regulator, putative, expressed	ARR12 (ARABIDOPSIS RESPONSE REGULATOR 12); transcription factor/ two-component response regulator
ARR	TaAffx.38632.1.S1_at	0.13588	0.355858	1.09876	-0.456618	0.0315198	-1.37232	-0.592498	0.0265783	-1.50786	0.162014	0.269187	1.11885	-0.0901464	0.537117	-1.06448	-0.25216	0.0650325	-1.19099	-0.227938	0.140029	-1.17116	-0.201805	0.202465	-1.15014	0.138534	0.405925	1.10079	-0.0181037	0.833553	-1.01263	Os02g0631700 protein n=3 Tax=Oryza sativa RepID=Q6H468_ORYSJ	cDNA response regulator receiver domain containing protein, expressed	ARR3 (RESPONSE REGULATOR 3); transcription regulator/ two-component response regulator
ARR	TaAffx.38489.1.S1_at	0.107681	0.339819	1.0775	-0.161767	0.139023	-1.11866	-0.269448	0.038585	-1.20535	-0.330468	0.00517393	-1.25742	-0.461799	0.0085803	-1.37726	-0.131331	0.221112	-1.0953	-0.208624	0.0688442	-1.15559	-0.646772	0.00124036	-1.56566	-0.508655	0.00678497	-1.42272	-0.929728	0.0127419	-1.90492	Response regulator n=2 Tax=Andropogoneae RepID=Q9FXQ7_MAIZE	cDNA OsRR5 type-A response regulator, expressed	ARR4 (RESPONSE REGULATOR 4); protein binding / transcription regulator/ two-component response regulator
ARR	Ta.11777.1.S1_x_at	0.418969	0.00284909	1.33697	0.0813835	0.458556	1.05803	-0.337585	0.0258615	-1.26364	0.306854	0.0117808	1.23701	0.722172	0.00342864	1.64966	0.415318	0.0260123	1.33359	-0.12274	0.131235	-1.0888	-0.234855	0.0275866	-1.17679	0.518048	0.0201454	1.43202	-0.165038	0.317351	-1.1212	Putative uncharacterized protein Sb06g032600 n=1 Tax=Sorghum bicolor RepID=C5YA64_SORBI	cDNA OsRR6 type-A response regulator, expressed	ARR6 (RESPONSE REGULATOR 6); transcription regulator/ two-component response regulator
ARR	Ta.11777.3.S1_at	0.392101	0.0213346	1.3123	-0.0803843	0.291417	-1.0573	-0.472485	0.0112615	-1.3875	0.419121	0.00787167	1.33711	-0.0343144	0.851235	-1.02407	-0.453435	0.0685122	-1.3693	-0.087475	0.229364	-1.06251	-0.0604548	0.645453	-1.04279	-0.0414051	0.822839	-1.02912	0.0150884	0.934995	1.01051	Putative uncharacterized protein Sb06g032600 n=1 Tax=Sorghum bicolor RepID=C5YA64_SORBI	cDNA OsRR6 type-A response regulator, expressed	ARR6 (RESPONSE REGULATOR 6); transcription regulator/ two-component response regulator
ARR	Ta.25890.1.S1_at	-0.277646	0.00463838	-1.21222	-0.33401	0.00176831	-1.26051	-0.0563637	0.432493	-1.03984	-0.617864	0.00389807	-1.5346	-0.0809754	0.493496	-1.05773	0.536889	0.000127584	1.45084	0.178578	0.156811	1.13177	-0.16164	0.0310463	-1.11856	0.431612	0.00146718	1.34874	0.126274	0.125279	1.09147	Os04g0442300 protein n=3 Tax=Oryza sativa RepID=Q2HWG4_ORYSJ	cDNA OsRR1 type-A response regulator, expressed	ARR7 (RESPONSE REGULATOR 7); transcription regulator/ two-component response regulator
ARR	Ta.11777.2.S1_at	0.704052	0.0012003	1.62907	0.0612293	0.550094	1.04335	-0.642823	0.000317553	-1.56138	0.399545	0.000608605	1.31909	0.230107	0.00745417	1.17292	-0.169438	0.0269629	-1.12462	0.0871135	0.362781	1.06224	-0.217394	0.0069653	-1.16263	0.255991	0.013799	1.19416	-0.0492552	0.62741	-1.03473	Response regulator 2 n=1 Tax=Zea mays RepID=Q9S7U8_MAIZE	cDNA OsRR6 type-A response regulator, expressed	ARR7 (RESPONSE REGULATOR 7); transcription regulator/ two-component response regulator
ARR	Ta.10408.1.S1_at	0.649945	0.0166371	1.56911	0.311038	0.125466	1.2406	-0.338907	0.0805096	-1.2648	-0.152648	0.386803	-1.11161	0.0332972	0.854497	1.02335	0.185945	0.199247	1.13756	0.491397	0.0591825	1.40581	-0.311195	0.0713999	-1.24073	0.213657	0.20129	1.15962	0.0748147	0.729956	1.05323	Os12g0139400 n=1 Tax=Oryza sativa Japonica Group RepID=UPI0000DD9DA6	cDNA response regulator receiver domain containing protein	ATRR3 (RESPONSE REGULATOR 3); transcription regulator/ two-component response regulator
ARR	TaAffx.119928.1.A1_s_at	-0.219649	0.0657449	-1.16445	-0.580385	0.00731485	-1.49525	-0.360736	0.022894	-1.28408	0.0864934	0.666901	1.06179	-0.242633	0.195987	-1.18315	-0.329127	0.0576024	-1.25625	-0.318606	0.125984	-1.24713	-0.0124635	0.92415	-1.00868	0.019146	0.860889	1.01336	0.100965	0.447943	1.07249	Os12g0139400 n=1 Tax=Oryza sativa Japonica Group RepID=UPI0000DD9DA6	cDNA response regulator receiver domain containing protein	ATRR3 (RESPONSE REGULATOR 3); transcription regulator/ two-component response regulator
ARR	Ta.25556.1.S1_at	0.180364	0.0155468	1.13317	-0.247564	0.00491817	-1.1872	-0.427928	1.68286e-06	-1.3453	0.00525879	0.96617	1.00365	-0.466275	0.0226259	-1.38154	-0.471534	0.00147856	-1.38658	0.0553242	0.677067	1.03909	-0.119781	0.00302111	-1.08657	-0.163387	0.0493559	-1.11991	-0.0684891	0.323989	-1.04862	Os04g0442300 protein n=3 Tax=Oryza sativa RepID=Q2HWG4_ORYSJ	cDNA OsRR1 type-A response regulator, expressed
ARR	TaAffx.84365.1.S1_at	0.421786	0.00526341	1.33959	0.305899	0.112889	1.23619	-0.115888	0.43899	-1.08364	-0.0914988	0.429984	-1.06548	-0.323406	0.0701308	-1.25128	-0.231908	0.125738	-1.17439	0.144733	0.259153	1.10553	-0.368552	0.00554798	-1.29106	-0.484571	0.0444342	-1.39917	-0.29833	0.0980909	-1.22972	Os03g0224200 protein n=2 Tax=Oryza sativa RepID=Q8H7S7_ORYSJ	cDNA two-component response regulator, putative, expressed
ARR	Ta.4054.1.A1_at	0.253866	0.178971	1.1924	0.614506	0.106196	1.53103	0.36064	0.239774	1.284	0.342242	0.113913	1.26772	0.75608	0.0421976	1.6889	0.413839	0.152806	1.33223	0.00128469	0.99527	1.00089	0.0896607	0.45248	1.06412	0.142859	0.691235	1.10409	0.134179	0.623867	1.09747	Putative uncharacterized protein n=1 Tax=Zea mays RepID=B4FGJ3_MAIZE	cDNA two-component response regulator, putative, expressed
ARR	TaAffx.103392.1.S1_at	0.253393	0.127565	1.19201	-0.168578	0.291657	-1.12395	-0.421971	0.00180399	-1.33976	0.225453	0.161918	1.16914	-0.164876	0.313212	-1.12107	-0.390329	0.00699495	-1.31069	-0.0932506	0.633256	-1.06677	-0.121191	0.0566999	-1.08763	-0.0895488	0.346453	-1.06404	-0.289861	0.128022	-1.22252	PREDICTED: similar to Ubiquitin specific peptidase 13 (isopeptidase T-3) n=1 Tax=Monodelphis domestica RepID=UPI0000F2E064	cDNA two-component response regulator, putative, expressed	Encodes a ECA1 gametogenesis related family protein
ARR	Ta.12422.3.S1_at	0.497881	0.00435923	1.41214	-0.0712843	0.288318	-1.05065	-0.569165	0.00204146	-1.48367	0.435132	0.000142366	1.35203	-0.0507376	0.290212	-1.03579	-0.485869	0.000236892	-1.40043	0.000418113	0.994034	1.00029	-0.0623314	0.448381	-1.04415	0.0209648	0.688832	1.01464	0.059613	0.285356	1.04219	Two-component response regulator-like PRR1 n=3 Tax=Oryza sativa RepID=PRR1_ORYSJ	cDNA response regulator receiver domain containing protein, expressed	TOC1 (TIMING OF CAB EXPRESSION 1); transcription regulator/ two-component response regulator
ARR	TaAffx.86800.1.S1_at	0.590555	0.0231661	1.50583	-0.1893	0.322147	-1.14021	-0.779855	0.00263369	-1.71696	1.39439	0.00959786	2.62878	0.378968	0.367593	1.30041	-1.01542	0.0123072	-2.0215	-0.573867	0.155556	-1.48851	0.22997	0.0712817	1.17281	-0.00559956	0.982812	-1.00389	0.467175	0.207518	1.3824	Two-component response regulator-like PRR1 n=3 Tax=Oryza sativa RepID=PRR1_ORYSJ	cDNA response regulator receiver domain containing protein, expressed	TOC1 (TIMING OF CAB EXPRESSION 1); transcription regulator/ two-component response regulator
ARR	TaAffx.86800.1.S1_x_at	0.613289	0.0100552	1.52974	-0.0766294	0.571854	-1.05455	-0.689919	0.00198818	-1.61319	1.19694	0.00486028	2.29252	0.166235	0.575764	1.12213	-1.0307	0.0047412	-2.04302	-0.363407	0.19755	-1.28646	0.220242	0.0625209	1.16493	-0.120543	0.55313	-1.08714	0.320751	0.307712	1.24898	Two-component response regulator-like PRR1 n=3 Tax=Oryza sativa RepID=PRR1_ORYSJ	cDNA response regulator receiver domain containing protein, expressed	TOC1 (TIMING OF CAB EXPRESSION 1); transcription regulator/ two-component response regulator
ARR	Ta.29499.1.A1_at	0.61639	0.0141863	1.53303	0.427422	0.143584	1.34483	-0.188968	0.456869	-1.13995	0.507642	0.0789178	1.42172	-0.148321	0.575045	-1.10828	-0.655963	0.0105698	-1.57567	0.250198	0.345643	1.18937	0.141449	0.297534	1.10301	-0.325546	0.253705	-1.25314	0.188513	0.29452	1.13959	Two-component response regulator-like PRR1 n=3 Tax=Oryza sativa RepID=PRR1_ORYSJ	cDNA response regulator receiver domain containing protein, expressed	TOC1 (TIMING OF CAB EXPRESSION 1); transcription regulator/ two-component response regulator
ARR	Ta.12422.1.S1_at	0.196623	0.13406	1.14601	-0.229583	0.304671	-1.1725	-0.426206	0.114031	-1.3437	0.402997	0.0898428	1.32225	-0.111371	0.585803	-1.08025	-0.514368	0.000952295	-1.42837	-0.127944	0.528936	-1.09274	0.0784302	0.459455	1.05587	-0.00973152	0.96305	-1.00677	0.24789	0.0564802	1.18747	Two-component response regulator-like PRR1 n=3 Tax=Oryza sativa RepID=PRR1_ORYSJ	cDNA response regulator receiver domain containing protein, expressed	TOC1 (TIMING OF CAB EXPRESSION 1); transcription regulator/ two-component response regulator
ARR	TaAffx.128530.1.S1_at	0.261975	0.43342	1.19912	-0.976055	0.0315464	-1.96708	-1.23803	1.45688e-06	-2.35876	0.737674	0.0339802	1.66749	-0.895774	0.0331682	-1.86061	-1.63345	0.000586733	-3.10254	-0.777163	0.109148	-1.71376	-0.301465	0.00219513	-1.23239	-0.696882	0.0125778	-1.621	0.453094	0.319443	1.36897	CCT motif family protein, expressed n=1 Tax=Oryza sativa Japonica Group RepID=Q2RAB7_ORYSJ	cDNA response regulator receiver domain containing protein, expressed	APRR3 (ARABIDOPSIS PSEUDO-RESPONSE REGULATOR 3); transcription regulator/ two-component response regulator
ARR	Ta.28006.1.S1_at	0.108689	0.0857217	1.07825	-0.477502	0.00574501	-1.39233	-0.586191	0.0015534	-1.50128	-0.180952	0.4663	-1.13363	-1.39453	0.00868783	-2.62903	-1.21358	0.00331931	-2.31912	-0.128243	0.600455	-1.09296	-0.417883	0.000671631	-1.33597	-1.04527	0.00683186	-2.06375	-0.222599	0.329614	-1.16683	CCT motif family protein, expressed n=1 Tax=Oryza sativa Japonica Group RepID=Q2RAB7_ORYSJ	cDNA response regulator receiver domain containing protein, expressed	APRR9 (ARABIDOPSIS PSEUDO-RESPONSE REGULATOR 9); protein binding / transcription regulator/ two-component response regulator
ARR	Ta.9719.1.S1_at	0.530496	0.0136924	1.44443	1.17257	8.30925e-05	2.25412	0.642071	0.0036479	1.56057	0.534079	0.000125496	1.44802	0.594428	0.000611189	1.50987	0.0603488	0.29782	1.04272	0.191015	0.0733021	1.14157	0.194598	0.13727	1.1444	-0.387125	0.00162092	-1.30778	-0.0277323	0.756595	-1.01941	Two-component response regulator-like PRR73 n=5 Tax=Oryza sativa RepID=PRR73_ORYSJ	cDNA response regulator receiver domain containing protein, expressed	PRR7 (PSEUDO-RESPONSE REGULATOR 7); transcription regulator/ two-component response regulator
ARR	Ta.26699.1.A1_at	0.629822	0.00255927	1.54737	0.0895318	0.174233	1.06402	-0.54029	0.00228044	-1.45426	0.362611	0.016096	1.28575	-0.370584	0.00740966	-1.29288	-0.733194	0.00101461	-1.66232	0.380147	0.00801706	1.30147	0.112935	0.342083	1.08143	-0.0799691	0.177637	-1.05699	-0.132847	0.146896	-1.09645	Two-component response regulator-like PRR73 n=3 Tax=Andropogoneae RepID=B6SHA1_MAIZE	protein response regulator receiver domain containing protein, expressed	PRR7 (PSEUDO-RESPONSE REGULATOR 7); transcription regulator/ two-component response regulator
ARR	Ta.6075.1.A1_at	-1.50138	0.000703874	-2.83114	-2.19064	0.000516862	-4.56507	-0.689256	0.0126921	-1.61245	-1.71519	4.6322e-05	-3.2834	-2.84329	4.94066e-05	-7.17655	-1.1281	0.00259591	-2.18571	0.00508341	0.975592	1.00353	-0.208723	0.095013	-1.15566	-0.64757	0.0379193	-1.56653	-0.390855	0.0572834	-1.31117	Two-component response regulator-like PRR95 n=3 Tax=Oryza sativa RepID=PRR95_ORYSJ	cDNA response regulator receiver domain containing protein, expressed	APRR3 (ARABIDOPSIS PSEUDO-RESPONSE REGULATOR 3); transcription regulator/ two-component response regulator
ARR	TaAffx.129077.1.A1_at	-0.0314623	0.70876	-1.02205	-0.267591	0.0530925	-1.2038	-0.236129	0.0187768	-1.17783	-0.00512273	0.964617	-1.00356	-0.202192	0.10462	-1.15044	-0.19707	0.0326012	-1.14637	-0.0424796	0.743624	-1.02988	-0.01614	0.790883	-1.01125	0.0229189	0.745703	1.01601	-0.034745	0.55365	-1.02438	Two-component response regulator-like PRR95 n=3 Tax=Oryza sativa RepID=PRR95_ORYSJ	cDNA response regulator receiver domain containing protein, expressed	APRR5 (ARABIDOPSIS PSEUDO-RESPONSE REGULATOR 5); transcription regulator/ two-component response regulator

## Sheet: SA metabolism
Table S2. Changes in the expression of salicylic acid metabolism related probesets between dormant and after-ripened seeds in both dry and imbibed states
		D-12/D-0			D-24/D-0			D-24/D-12			AR-12/AR-0			AR-24/AR-0			AR-24/AR-12			AR-0/D-0			AR-12/D-12			AR-24/D-24			AR-24/AR-24+ABA			Annotation
Gene	Probeset	Log2 FC	P-value	Linear FC	Log2 FC	P-value	Linear FC	Log2 FC	P-value	Linear FC	Log2 FC	P-value	Linear FC	Log2 FC	P-value	Linear FC	Log2 FC	P-value	Linear FC	Log2 FC	P-value	Linear FC	Log2 FC	P-value	Linear FC	Log2 FC	P-value	Linear FC	Log2 FC	P-value	Linear FC	UniProt Desc	Rice 6 Desc	Arab. Desc
ICS	Ta.13691.1.A1_at	0.910301	0.00345589	1.87944	0.661122	0.0145023	1.58131	-0.249179	0.295613	-1.18853	0.628261	0.0331533	1.5457	0.507227	0.0416162	1.42132	-0.121034	0.359725	-1.08751	0.188562	0.332811	1.13963	-0.0934776	0.623573	-1.06694	0.0346675	0.839314	1.02432	0.321674	0.00479196	1.24978	Putative uncharacterized protein n=2 Tax=Oryza sativa Japonica Group RepID=B9F266_ORYSJ	cDNA MATE domain containing protein, expressed	antiporter/ drug transporter
ICS	Ta.15275.1.S1_at	0.309691	0.00140905	1.23944	0.309173	0.000429853	1.239	-0.000518467	0.989613	-1.00036	0.554307	0.000149639	1.46846	1.03879	0.000111548	2.05451	0.484485	0.00269183	1.39909	-0.00332951	0.919464	-1.00231	0.241287	0.00651111	1.18205	0.72629	0.000430238	1.65438	0.491138	0.00417686	1.40555	Mitochondrial outer membrane porin n=1 Tax=Triticum aestivum RepID=VDAC1_WHEAT	cDNA isochorismate synthase 1, chloroplast precursor, putative, expressed	VDAC1 (VOLTAGE DEPENDENT ANION CHANNEL 1); voltage-gated anion channel
ICS	TaAffx.30228.1.S1_at	0.302673	0.105249	1.23343	-0.091111	0.426063	-1.06519	-0.393784	0.0885586	-1.31384	0.650887	0.00661963	1.57013	0.294395	0.0772546	1.22637	-0.356492	0.00372331	-1.28031	-0.241718	0.113346	-1.1824	0.106496	0.517338	1.07661	0.143788	0.256012	1.1048	-0.023314	0.844805	-1.01629	Voltage-dependent anion channel protein 1b n=4 Tax=Andropogoneae RepID=Q9SPD8_MAIZE	cDNA isochorismate synthase 1, chloroplast precursor, putative, expressed	VDAC1 (VOLTAGE DEPENDENT ANION CHANNEL 1); voltage-gated anion channel
PAL	Ta.28182.1.A1_x_at	0.260227	0.0377982	1.19767	0.446488	0.0070753	1.36272	0.18626	0.178108	1.13781	0.493366	0.0269645	1.40773	0.411382	0.0609509	1.32996	-0.0819844	0.419426	-1.05847	0.10654	0.49232	1.07664	0.339679	0.0200616	1.26547	0.0714343	0.566565	1.05076	0.0930074	0.370337	1.06659	Phenylalanine ammonia-lyase n=1 Tax=Triticum aestivum RepID=PALY_WHEAT	cDNA phenylalanine ammonia-lyase, putative, expressed	pal1 (Phe ammonia lyase 1); phenylalanine ammonia-lyase
PAL	Ta.7022.2.S1_at	0.30282	0.110519	1.23355	0.495612	0.120292	1.40992	0.192791	0.491849	1.14297	0.548011	0.0133863	1.46207	0.80888	0.00100135	1.75185	0.260869	0.106468	1.1982	-0.073233	0.582583	-1.05207	0.171957	0.326715	1.12659	0.240035	0.372116	1.18102	0.0922309	0.504515	1.06602	Phenylalanine ammonia-lyase n=1 Tax=Triticum aestivum RepID=PALY_WHEAT	cDNA phenylalanine ammonia-lyase, putative, expressed	pal1 (Phe ammonia lyase 1); phenylalanine ammonia-lyase
PAL	Ta.7022.2.S1_x_at	0.0642867	0.647459	1.04557	0.560624	0.0163968	1.47491	0.496337	0.00498687	1.41063	0.505402	0.0336602	1.41952	0.990454	0.00383276	1.98681	0.485052	0.0191714	1.39964	0.0531699	0.782721	1.03754	0.494285	0.00750416	1.40862	0.483	0.015793	1.39765	0.0240248	0.855052	1.01679	Phenylalanine ammonia-lyase n=1 Tax=Triticum aestivum RepID=PALY_WHEAT	cDNA phenylalanine ammonia-lyase, putative, expressed	pal1 (Phe ammonia lyase 1); phenylalanine ammonia-lyase
PAL	Ta.9220.1.S1_a_at	0.444565	0.132126	1.3609	1.20903	0.0467989	2.31183	0.764468	0.107679	1.69874	0.634574	0.00262961	1.55248	1.90635	5.45734e-06	3.7486	1.27178	0.000338553	2.41459	0.480244	0.0979029	1.39498	0.670253	0.00521227	1.59135	1.17756	0.0326233	2.26194	1.27273	0.000273478	2.41618	Putative phenylalanine ammonia-lyase (Fragment) n=1 Tax=Hordeum vulgare RepID=A8R7D3_HORVU	cDNA phenylalanine ammonia-lyase, putative, expressed	pal1 (Phe ammonia lyase 1); phenylalanine ammonia-lyase
PAL	Ta.9220.2.S1_at	-0.260473	0.0557911	-1.19787	-0.507293	0.00361064	-1.42138	-0.24682	0.0253418	-1.18659	-0.163843	0.093601	-1.12027	-0.300138	0.0655574	-1.23126	-0.136295	0.300243	-1.09908	-0.0927758	0.383775	-1.06642	0.00385376	0.962998	1.00267	0.114378	0.356734	1.08251	-0.0241694	0.838143	-1.01689	Phenylalanine ammonia-lyase n=1 Tax=Triticum aestivum RepID=PALY_WHEAT	cDNA phenylalanine ammonia-lyase, putative, expressed	pal1 (Phe ammonia lyase 1); phenylalanine ammonia-lyase
PAL	TaAffx.108615.1.S1_at	0.130479	0.340786	1.09466	-0.250991	0.111738	-1.19002	-0.38147	0.00238285	-1.30267	0.123776	0.374433	1.08958	-0.445747	0.0378686	-1.36202	-0.569523	0.00349822	-1.48403	0.0966748	0.590735	1.06931	0.0899722	0.147378	1.06435	-0.0980812	0.361999	-1.07035	-0.150872	0.260858	-1.11024	Phenylalanine ammonia-lyase (Fragment) n=1 Tax=Hordeum vulgare RepID=O04876_HORVU	cDNA phenylalanine ammonia-lyase, putative, expressed	pal1 (Phe ammonia lyase 1); phenylalanine ammonia-lyase
PAL	TaAffx.45277.1.S1_x_at	-0.0173058	0.922782	-1.01207	-0.114618	0.238896	-1.08269	-0.0973124	0.554122	-1.06978	0.298419	0.146807	1.2298	1.62843	0.0170545	3.09175	1.33001	0.0341077	2.51404	-0.107374	0.458483	-1.07727	0.208351	0.348447	1.15537	1.63567	0.0151588	3.10732	1.05069	0.0894569	2.07152	Phenylalanine ammonia-lyase n=1 Tax=Triticum aestivum RepID=PALY_WHEAT	cDNA phenylalanine ammonia-lyase, putative, expressed	pal1 (Phe ammonia lyase 1); phenylalanine ammonia-lyase
PAL	TaAffx.54642.1.S1_at	0.347519	0.0155105	1.27237	0.255216	0.0920356	1.19351	-0.0923034	0.361825	-1.06607	0.399749	0.034472	1.31928	0.0556632	0.702669	1.03934	-0.344086	0.00208974	-1.26935	-0.0333496	0.834682	-1.02338	0.0188802	0.589389	1.01317	-0.232902	0.073879	-1.1752	0.0309244	0.573429	1.02167	Phenylalanine ammonia-lyase (Fragment) n=1 Tax=Hordeum vulgare RepID=O04876_HORVU	cDNA phenylalanine ammonia-lyase, putative, expressed	pal1 (Phe ammonia lyase 1); phenylalanine ammonia-lyase
PAL	TaAffx.92008.1.A1_at	-0.375775	0.0222445	-1.29754	0.19031	0.0410915	1.14101	0.566085	0.00490971	1.4805	0.007094	0.974601	1.00493	0.396458	0.154127	1.31627	0.389364	0.0188041	1.30982	-0.143759	0.533453	-1.10478	0.239111	0.0750118	1.18026	0.0623898	0.576016	1.04419	0.110032	0.322523	1.07925	Phenylalanine ammonia-lyase n=1 Tax=Triticum aestivum RepID=PALY_WHEAT	cDNA phenylalanine ammonia-lyase, putative, expressed	pal1 (Phe ammonia lyase 1); phenylalanine ammonia-lyase
PAL	TaAffx.92008.1.A1_s_at	2.35666	0.000642709	5.12184	3.5713	0.000758277	11.8869	1.21464	0.0175158	2.32083	2.73768	5.38943e-05	6.66997	3.58026	9.61185e-06	11.961	0.842585	0.00895574	1.79326	0.0783653	0.764199	1.05582	0.459382	0.037974	1.37495	0.0873269	0.801505	1.0624	0.0786959	0.704289	1.05606	Phenylalanine ammonia-lyase n=1 Tax=Triticum aestivum RepID=PALY_WHEAT	cDNA phenylalanine ammonia-lyase, putative, expressed	pal1 (Phe ammonia lyase 1); phenylalanine ammonia-lyase
PAL	Ta.7022.1.S1_at	0.888271	0.0117821	1.85096	0.722728	0.0627588	1.6503	-0.165543	0.535269	-1.12159	0.486429	0.133635	1.40097	1.13858	0.0192786	2.20164	0.652152	0.0145653	1.57151	0.516457	0.17211	1.43044	0.114615	0.342312	1.08269	0.93231	0.0262535	1.90833	0.235628	0.210314	1.17742	Phenylalanine ammonia-lyase n=5 Tax=Poaceae RepID=Q7F929_ORYSJ	cDNA phenylalanine ammonia-lyase, putative, expressed	PAL4 (Phenylalanine ammonia-lyase 4); ammonia ligase/ ammonia-lyase/ catalytic
PAL	Ta.7022.1.S1_s_at	0.429434	0.051641	1.34671	0.475238	0.120958	1.39015	0.0458042	0.856968	1.03226	0.995727	0.00227102	1.99409	3.08219	0.00033402	8.46897	2.08646	0.00213906	4.24704	0.0160694	0.904765	1.0112	0.582363	0.0270581	1.4973	2.62302	0.00151239	6.16037	1.8183	0.00579513	3.52665	Phenylalanine ammonia-lyase n=5 Tax=Poaceae RepID=Q7F929_ORYSJ	cDNA phenylalanine ammonia-lyase, putative, expressed	PAL4 (Phenylalanine ammonia-lyase 4); ammonia ligase/ ammonia-lyase/ catalytic
PAL	Ta.7022.1.S1_x_at	1.17424	0.0103588	2.25674	0.718533	0.0538442	1.64551	-0.45571	0.0837866	-1.37146	1.14509	0.000804448	2.2116	1.46725	0.000289978	2.76493	0.322156	0.0653488	1.2502	0.250769	0.349351	1.18984	0.221616	0.241982	1.16604	0.999482	0.00442939	1.99928	0.587002	0.0111967	1.50212	Phenylalanine ammonia-lyase n=5 Tax=Poaceae RepID=Q7F929_ORYSJ	cDNA phenylalanine ammonia-lyase, putative, expressed	PAL4 (Phenylalanine ammonia-lyase 4); ammonia ligase/ ammonia-lyase/ catalytic
PAL	Ta.20429.1.S1_at	3.04706	8.6373e-05	8.26524	3.82228	0.000164585	14.1456	0.775226	0.023722	1.71146	3.56434	4.04732e-05	11.8297	4.01425	3.06897e-05	16.1589	0.449916	0.0192002	1.36596	-0.0586972	0.823757	-1.04153	0.458583	0.00686525	1.37419	0.133273	0.595831	1.09678	0.108128	0.507057	1.07783	Phenylalanine ammonia-lyase (Fragment) n=2 Tax=BEP clade RepID=Q43664_WHEAT	cDNA phenylalanine ammonia-lyase, putative, expressed	PAL2; phenylalanine ammonia-lyase
PAL	Ta.28046.1.A1_at	1.56744	0.000142758	2.96379	2.35095	0.000989459	5.10161	0.783507	0.0400893	1.72131	1.47233	2.50012e-05	2.77471	1.60457	0.00236123	3.04105	0.132236	0.58714	1.09599	0.227827	0.120278	1.17107	0.132717	0.0804936	1.09636	-0.518554	0.201636	-1.43252	-0.0393462	0.9097	-1.02765	Phenylalanine ammonia-lyase (Fragment) n=1 Tax=Triticum aestivum RepID=Q43211_WHEAT	cDNA phenylalanine ammonia-lyase, putative, expressed	PAL2; phenylalanine ammonia-lyase
PAL	Ta.9220.3.S1_at	-0.460689	0.0112056	-1.3762	-0.488783	0.0109687	-1.40326	-0.0280939	0.855386	-1.01966	-0.325295	0.00839812	-1.25292	-0.302253	0.0785071	-1.23307	0.0230421	0.870028	1.0161	-0.118717	0.0820957	-1.08577	0.0166777	0.888939	1.01163	0.0678136	0.694529	1.04813	-0.149581	0.316106	-1.10925	Phenylalanine ammonia-lyase (Fragment) n=1 Tax=Hordeum vulgare RepID=O04876_HORVU	cDNA phenylalanine ammonia-lyase, putative, expressed	PAL2; phenylalanine ammonia-lyase
PAL	Ta.9220.3.S1_x_at	0.252769	0.231747	1.19149	-0.158626	0.0257828	-1.11622	-0.411395	0.0786194	-1.32997	0.0888861	0.20754	1.06355	-0.182449	0.0282832	-1.13481	-0.271335	0.0117231	-1.20692	-0.0376892	0.537641	-1.02647	-0.201572	0.326609	-1.14995	-0.0615118	0.232438	-1.04356	-0.0310674	0.638661	-1.02177	Phenylalanine ammonia-lyase (Fragment) n=1 Tax=Hordeum vulgare RepID=O04876_HORVU	cDNA phenylalanine ammonia-lyase, putative, expressed	PAL2; phenylalanine ammonia-lyase
PAL	TaAffx.110175.1.S1_at	0.0234944	0.841917	1.01642	-0.316572	0.0736977	-1.24537	-0.340066	0.0143657	-1.26581	-0.0571453	0.453202	-1.04041	-0.303678	0.00503674	-1.23429	-0.246533	0.00791898	-1.18635	0.030567	0.808618	1.02141	-0.0500727	0.410617	-1.03532	0.0434607	0.612496	1.03058	0.177924	0.0774559	1.13125	Phenylalanine ammonia-lyase (Fragment) n=1 Tax=Hordeum vulgare RepID=O04876_HORVU	cDNA phenylalanine ammonia-lyase, putative, expressed	PAL2; phenylalanine ammonia-lyase
PAL	TaAffx.128856.3.S1_at	-0.64398	0.00243864	-1.56263	-0.375378	0.0264276	-1.29718	0.268602	0.0163758	1.20464	-0.657359	0.000583843	-1.57719	-0.363786	0.00483253	-1.2868	0.293573	0.000706024	1.22567	-0.0169851	0.88414	-1.01184	-0.0303639	0.462312	-1.02127	-0.00539292	0.937095	-1.00375	-0.0825699	0.112042	-1.0589	Phenylalanine ammonia-lyase (Fragment) n=1 Tax=Hordeum vulgare RepID=O04876_HORVU	cDNA phenylalanine ammonia-lyase, putative, expressed	PAL2; phenylalanine ammonia-lyase
PAL	TaAffx.45277.2.S1_at	-0.166519	0.283092	-1.12235	-0.107873	0.300266	-1.07764	0.0586453	0.725338	1.04149	-0.207403	0.164012	-1.15461	-0.358923	0.0347458	-1.28247	-0.15152	0.121276	-1.11074	0.142667	0.262937	1.10394	0.101783	0.520265	1.0731	-0.108382	0.323072	-1.07802	-0.0437174	0.530941	-1.03077	Phenylalanine ammonia-lyase (Fragment) n=1 Tax=Hordeum vulgare RepID=O04876_HORVU	cDNA phenylalanine ammonia-lyase, putative, expressed	PAL2; phenylalanine ammonia-lyase
PAL	TaAffx.112457.3.S1_at	0.140099	0.281953	1.10198	-0.289667	0.0295912	-1.22236	-0.429767	0.00411568	-1.34702	0.264063	0.0531548	1.20086	-0.268788	0.250149	-1.2048	-0.532851	0.0680099	-1.44679	-0.218231	0.0855514	-1.16331	-0.0942673	0.453783	-1.06752	-0.197352	0.370992	-1.14659	-0.0325985	0.882254	-1.02285	Phenylalanine ammonia-lyase n=2 Tax=Poaceae RepID=Q84VE0_ORYSJ	cDNA phenylalanine ammonia-lyase, putative, expressed	PAL4 (Phenylalanine ammonia-lyase 4); ammonia ligase/ ammonia-lyase/ catalytic
PAL	TaAffx.24244.1.S1_at	-0.0935119	0.52421	-1.06696	-0.13095	0.28256	-1.09502	-0.0374381	0.751005	-1.02629	0.202059	0.0389685	1.15034	-0.0928741	0.477842	-1.06649	-0.294933	0.0779563	-1.22683	-0.0706405	0.518047	-1.05018	0.224931	0.114632	1.16872	-0.0325646	0.805262	-1.02283	0.123135	0.462492	1.0891	Phenylalanine ammonia-lyase n=1 Tax=Triticum aestivum RepID=PALY_WHEAT	cDNA phenylalanine ammonia-lyase, putative, expressed	pal1 (Phe ammonia lyase 1); phenylalanine ammonia-lyase
PAL	Ta.28736.1.S1_at	0.538701	0.024077	1.45266	0.871211	0.0113113	1.8292	0.33251	0.0741111	1.2592	0.169798	0.217554	1.1249	0.296988	0.03411	1.22858	0.12719	0.152634	1.09216	0.176886	0.363483	1.13044	-0.192017	0.0815613	-1.14236	-0.397338	0.0397037	-1.31707	0.216432	0.14949	1.16186	Phenylalanine ammonia-lyase n=1 Tax=Sorghum bicolor RepID=C5YCD7_SORBI	cDNA phenylalanine ammonia-lyase, putative, expressed	pal1 (Phe ammonia lyase 1); phenylalanine ammonia-lyase
PAL	TaAffx.58182.2.S1_x_at	-0.0328814	0.862912	-1.02305	-0.461925	0.0839165	-1.37738	-0.429044	0.0817716	-1.34634	-0.176704	0.497939	-1.1303	-0.421227	0.154629	-1.33907	-0.244523	0.014482	-1.1847	0.00894687	0.975408	1.00622	-0.134876	0.315295	-1.098	0.0496453	0.765079	1.03501	-0.084225	0.582914	-1.06012	Phenylalanine ammonia-lyase n=2 Tax=Poaceae RepID=B4FWE4_MAIZE	cDNA phenylalanine ammonia-lyase, putative, expressed	pal1 (Phe ammonia lyase 1); phenylalanine ammonia-lyase
PAL	TaAffx.7248.1.S1_x_at	0.253128	0.103869	1.19179	-0.0751618	0.174806	-1.05348	-0.32829	0.0488344	-1.25553	-0.062588	0.40011	-1.04434	-0.51768	0.00525638	-1.43165	-0.455092	0.00255906	-1.37087	0.246747	0.0313104	1.18653	-0.0689694	0.581001	-1.04897	-0.195771	0.0520921	-1.14534	-0.0447248	0.62131	-1.03149	Phenylalanine ammonia-lyase n=4 Tax=Poaceae RepID=Q6K6Q1_ORYSJ	cDNA phenylalanine ammonia-lyase, putative, expressed	pal1 (Phe ammonia lyase 1); phenylalanine ammonia-lyase
PAL	TaAffx.58182.1.S1_at	0.197148	0.226152	1.14643	-0.00582335	0.958089	-1.00405	-0.202972	0.186479	-1.15107	0.123133	0.54769	1.0891	-0.297084	0.152698	-1.22866	-0.420217	0.0333119	-1.33813	0.110953	0.556281	1.07994	0.0369378	0.824426	1.02593	-0.180307	0.134914	-1.13312	0.0141237	0.892371	1.00984	Phenylalanine ammonia-lyase n=2 Tax=Poaceae RepID=B4FWE4_MAIZE	cDNA phenylalanine ammonia-lyase, putative, expressed	pal1 (Phe ammonia lyase 1); phenylalanine ammonia-lyase
PAL	Ta.1465.1.S1_at	-0.112092	0.148718	-1.08079	0.0769577	0.322323	1.05479	0.18905	0.0719661	1.14001	0.142453	0.0863125	1.10378	0.461678	0.00254632	1.37714	0.319225	0.000938968	1.24766	-0.111836	0.186864	-1.0806	0.142709	0.0585625	1.10398	0.272884	0.0148176	1.20822	0.454326	0.00664824	1.37014	Putative phenylalanine ammonia-lyase n=1 Tax=BRmbusa ventricosa RepID=Q52QV1_9POAL	cDNA phenylalanine ammonia-lyase, putative, expressed	pal1 (Phe ammonia lyase 1); phenylalanine ammonia-lyase
PAL	TaAffx.112457.2.S1_at	0.264504	0.0553433	1.20122	-0.463409	0.00589534	-1.3788	-0.727913	0.000223609	-1.65624	0.13156	0.0406356	1.09548	-0.347862	0.00899085	-1.27267	-0.479422	0.00124144	-1.39419	-0.179969	0.129148	-1.13286	-0.312913	0.00408785	-1.24221	-0.0644225	0.364707	-1.04567	-0.0791946	0.417378	-1.05643	Phenylalanine ammonia-lyase n=5 Tax=Andropogoneae RepID=C5XXT8_SORBI	cDNA phenylalanine ammonia-lyase, putative, expressed	PAL4 (Phenylalanine ammonia-lyase 4); ammonia ligase/ ammonia-lyase/ catalytic
PAL	TaAffx.112457.2.S1_x_at	-0.0899064	0.308508	-1.0643	-0.598225	0.00285141	-1.51385	-0.508319	0.0126447	-1.42239	-0.121335	0.753313	-1.08774	-0.41103	0.29891	-1.32963	-0.289695	0.0625627	-1.22238	-0.0292446	0.936282	-1.02048	-0.0606732	0.672239	-1.04295	0.157951	0.172037	1.1157	0.126606	0.228784	1.09172	Phenylalanine ammonia-lyase n=5 Tax=Andropogoneae RepID=C5XXT8_SORBI	cDNA phenylalanine ammonia-lyase, putative, expressed	PAL4 (Phenylalanine ammonia-lyase 4); ammonia ligase/ ammonia-lyase/ catalytic
PAL	TaAffx.112457.4.S1_at	0.12159	0.421133	1.08793	-0.206264	0.00683902	-1.1537	-0.327853	0.0661798	-1.25514	0.613236	0.11996	1.52969	-0.0275358	0.937632	-1.01927	-0.640772	0.0167633	-1.55916	-0.214446	0.517264	-1.16026	0.2772	0.146734	1.21184	-0.0357181	0.810996	-1.02507	0.0751117	0.668048	1.05344	Phenylalanine ammonia-lyase n=5 Tax=Andropogoneae RepID=C5XXT8_SORBI	cDNA phenylalanine ammonia-lyase, putative, expressed	PAL4 (Phenylalanine ammonia-lyase 4); ammonia ligase/ ammonia-lyase/ catalytic
PAL	TaAffx.8486.1.S1_at	-0.250719	0.0150162	-1.1898	-0.199402	0.181322	-1.14822	0.0513167	0.692153	1.03621	-0.410953	0.0634034	-1.32956	-0.350232	0.109992	-1.27477	0.0607213	0.586335	1.04299	0.113017	0.510873	1.08149	-0.0472176	0.547821	-1.03327	-0.0378131	0.801897	-1.02656	-0.0671117	0.483673	-1.04762	Putative uncharacterized protein n=1 Tax=Zea mays RepID=C0P7P3_MAIZE	cDNA phenylalanine ammonia-lyase, putative, expressed	PAL4 (Phenylalanine ammonia-lyase 4); ammonia ligase/ ammonia-lyase/ catalytic
PAL	TaAffx.119254.1.S1_at	-0.18336	0.0545671	-1.13552	-0.611899	0.00118587	-1.52827	-0.428539	0.0127275	-1.34587	-0.0647022	0.6479	-1.04587	-0.510212	0.00952888	-1.42426	-0.445509	0.0506146	-1.3618	-0.167803	0.0151944	-1.12335	-0.0491454	0.74676	-1.03465	-0.066116	0.626365	-1.04689	0.0469485	0.783286	1.03308	Phenylalanine ammonia-lyase n=22 Tax=Poaceae RepID=PAL2_ORYSJ	cDNA phenylalanine ammonia-lyase, putative, expressed	PAL4 (Phenylalanine ammonia-lyase 4); ammonia ligase/ ammonia-lyase/ catalytic
GH3	Ta.4110.1.S1_at	-0.559168	0.00150725	-1.47342	-0.0120522	0.926171	-1.00839	0.547116	0.01268	1.46116	-0.224713	0.00331058	-1.16854	0.707632	0.0333127	1.63312	0.932345	0.0135492	1.90837	-0.0521832	0.378642	-1.03683	0.282272	0.00988242	1.21611	0.667501	0.0545006	1.58832	0.457081	0.117566	1.37276	ProBRble indole-3-acetic acid-amido synthetase GH3.2 n=3 Tax=Oryza sativa RepID=GH32_ORYSJ	cDNA OsGH3.2 - ProBRble indole-3-acetic acid-amido synthetase, expressed	GH3.3; indole-3-acetic acid amido synthetase
GH3	Ta.4458.1.A1_at	0.301841	0.174222	1.23272	-0.110088	0.416436	-1.07929	-0.411928	0.0450463	-1.33046	0.226913	0.115627	1.17033	0.329077	0.056877	1.25621	0.102163	0.297704	1.07338	0.0943821	0.577904	1.06761	0.0194551	0.901818	1.01358	0.533547	0.00221	1.44748	0.514925	0.00197883	1.42892	ProBRble indole-3-acetic acid-amido synthetase GH3.1 n=2 Tax=Oryza sativa Japonica Group RepID=GH31_ORYSJ	cDNA OsGH3.1 - ProBRble indole-3-acetic acid-amido synthetase, expressed	WES1; indole-3-acetic acid amido synthetase
GH3	Ta.4458.2.S1_at	0.0422758	0.733686	1.02974	-0.368878	0.0077597	-1.29135	-0.411154	0.0109825	-1.32975	0.22374	0.214954	1.16776	-0.155379	0.379367	-1.11371	-0.379118	0.0103583	-1.30055	-0.327351	0.110951	-1.25471	-0.145888	0.232551	-1.10641	-0.113852	0.167331	-1.08211	-0.0950208	0.300205	-1.06808	Putative uncharacterized protein Sb03g036680 n=1 Tax=Sorghum bicolor RepID=C5XLS5_SORBI	cDNA OsGH3.1 - ProBRble indole-3-acetic acid-amido synthetase, expressed	DFL1 (DWARF IN LIGHT 1); indole-3-acetic acid amido synthetase
GH3	TaAffx.87187.1.S1_at	0.102824	0.427369	1.07387	-0.00512126	0.948067	-1.00356	-0.107945	0.4195	-1.07769	0.0516376	0.642174	1.03644	0.139758	0.283026	1.10172	0.0881203	0.345772	1.06298	0.0755433	0.503001	1.05376	0.0243573	0.844806	1.01703	0.220422	0.065016	1.16508	0.00397027	0.961596	1.00276	Putative uncharacterized protein Sb01g032020 n=1 Tax=Sorghum bicolor RepID=C5WVN4_SORBI	cDNA OsGH3.8 - ProBRble indole-3-acetic acid-amido synthetase, expressed	GH3.1

## Sheet: SA signalling
Table S2. Changes in the expression of salicylic acid signaling related probesets between dormant and after-ripened seeds in both dry and imbibed states
		D-12/D-0			D-24/D-0			D-24/D-12			AR-12/AR-0			AR-24/AR-0			AR-24/AR-12			AR-0/D-0			AR-12/D-12			AR-24/D-24			AR-24/AR-24+ABA			Annotation
Gene	Probeset	Log2 FC	P-value	Linear FC	Log2 FC	P-value	Linear FC	Log2 FC	P-value	Linear FC	Log2 FC	P-value	Linear FC	Log2 FC	P-value	Linear FC	Log2 FC	P-value	Linear FC	Log2 FC	P-value	Linear FC	Log2 FC	P-value	Linear FC	Log2 FC	P-value	Linear FC	Log2 FC	P-value	Linear FC	UniProt Desc	Rice 6 Desc	Arab. Desc
SSI2	Ta.8504.1.S1_at	0.361858	0.00341049	1.28508	0.227282	0.0100694	1.17063	-0.134576	0.0314154	-1.09777	-0.282685	0.0114282	-1.21646	-0.727688	0.00281121	-1.65598	-0.445003	0.0102391	-1.36132	-0.0904339	0.291011	-1.06469	-0.734976	7.4584e-05	-1.66437	-1.0454	0.000407393	-2.06394	0.0487715	0.774548	1.03438	Os01g0919900 protein n=10 Tax=Poaceae RepID=Q0JGJ9_ORYSJ	cDNA acyl-desaturase, chloroplast precursor, putative, expressed	SSI2; acyl-[acyl-carrier-protein] desaturase/ stearoyl-CoA 9-desaturase
SSI2	Ta.8504.2.S1_x_at	-0.112124	0.35557	-1.08082	-0.394912	0.0172179	-1.31486	-0.282788	0.00455467	-1.21654	-0.751967	0.00334324	-1.68409	-1.27685	0.000389049	-2.42309	-0.524882	0.000209713	-1.43882	-0.205508	0.244989	-1.15309	-0.84535	0.000119703	-1.7967	-1.08744	3.05429e-06	-2.12497	0.253075	0.0902724	1.19174	Os01g0919900 protein n=10 Tax=Poaceae RepID=Q0JGJ9_ORYSJ	cDNA acyl-desaturase, chloroplast precursor, putative, expressed	SSI2; acyl-[acyl-carrier-protein] desaturase/ stearoyl-CoA 9-desaturase
SSI2	Ta.1250.1.S1_at	-0.0686021	0.124861	-1.0487	-0.585747	0.000936563	-1.50082	-0.517145	0.00143181	-1.43112	0.124492	0.317101	1.09012	-0.347471	0.0533128	-1.27233	-0.471963	0.00256137	-1.38699	-0.23136	0.105807	-1.17394	-0.0382666	0.243389	-1.02688	0.00691587	0.943845	1.0048	0.181459	0.358588	1.13403	Acyl-[acyl-carrier-protein] desaturase n=2 Tax=Poaceae RepID=C5YED4_SORBI	cDNA acyl-desaturase, chloroplast precursor, putative, expressed	SSI2; acyl-[acyl-carrier-protein] desaturase/ stearoyl-CoA 9-desaturase
SSI2	Ta.27209.1.A1_at	-0.874575	0.00137412	-1.83347	-0.362079	0.0567526	-1.28528	0.512496	0.0183945	1.42652	-0.869499	0.000805929	-1.82703	-0.34855	0.0192538	-1.27328	0.52095	0.000183948	1.4349	-0.0693836	0.595739	-1.04927	-0.0643077	0.478106	-1.04558	-0.0558542	0.644067	-1.03947	-0.0527694	0.179743	-1.03725	Acyl-[acyl-carrier-protein] desaturase n=2 Tax=Poaceae RepID=C5YED4_SORBI	cDNA acyl-desaturase, chloroplast precursor, putative, expressed	SSI2; acyl-[acyl-carrier-protein] desaturase/ stearoyl-CoA 9-desaturase
SSI2	Ta.27209.1.S1_at	-0.139173	0.381888	-1.10127	-0.417134	0.0523262	-1.33527	-0.277961	0.0412363	-1.21248	0.0797417	0.246885	1.05683	-0.118414	0.0265644	-1.08554	-0.198156	0.0366441	-1.14723	-0.295856	0.0895349	-1.22761	-0.0769419	0.375959	-1.05478	0.00286281	0.974182	1.00199	0.164315	0.232574	1.12063	Acyl-[acyl-carrier-protein] desaturase n=2 Tax=Poaceae RepID=C5YED4_SORBI	cDNA acyl-desaturase, chloroplast precursor, putative, expressed	SSI2; acyl-[acyl-carrier-protein] desaturase/ stearoyl-CoA 9-desaturase
SSI2	Ta.8504.3.S1_at	0.101515	0.269468	1.0729	-0.0649606	0.466761	-1.04606	-0.166476	0.000632902	-1.12231	0.253656	0.0255219	1.19222	-0.00883257	0.91494	-1.00614	-0.262488	0.053047	-1.19955	-0.021783	0.811158	-1.01521	0.130358	0.118687	1.09457	0.0343451	0.661216	1.02409	0.0453097	0.772933	1.03191	Os01g0919900 protein n=10 Tax=Poaceae RepID=Q0JGJ9_ORYSJ	cDNA acyl-desaturase, chloroplast precursor, putative, expressed	actin binding
SSI2	TaAffx.82880.1.S1_at	0.575976	0.00214616	1.49069	0.0894892	0.470002	1.06399	-0.486487	0.018301	-1.40103	0.333182	0.13667	1.25979	-0.142539	0.396288	-1.10385	-0.475721	0.0249135	-1.39061	0.080068	0.599537	1.05707	-0.162726	0.303932	-1.1194	-0.15196	0.287684	-1.11108	-0.00343554	0.97103	-1.00238		cDNA acyl-desaturase, chloroplast precursor, putative, expressed	acyl-(acyl-carrier-protein) desaturase, putative / stearoyl-ACP desaturase, putative
SSI2	TaAffx.82880.1.S1_x_at	1.38962	4.29346e-05	2.62011	-0.351699	0.0545594	-1.27606	-1.74132	9.78078e-05	-3.34342	1.78557	7.95644e-06	3.44754	0.05462	0.796489	1.03859	-1.73095	0.00104681	-3.31946	-0.362164	0.00871919	-1.28535	0.0337802	0.581323	1.02369	0.0441558	0.85398	1.03108	0.0391832	0.863588	1.02753		cDNA acyl-desaturase, chloroplast precursor, putative, expressed	acyl-(acyl-carrier-protein) desaturase, putative / stearoyl-ACP desaturase, putative
TRX-H5	Ta.24466.1.S1_x_at	0.0859549	0.291494	1.06139	-0.253176	0.0612584	-1.19183	-0.339131	0.0106483	-1.26499	-0.386595	0.00850211	-1.3073	-0.792099	0.00424058	-1.73159	-0.405504	0.0236761	-1.32455	0.178065	0.155087	1.13136	-0.294485	0.000855899	-1.22645	-0.360858	0.0527853	-1.28419	-0.314267	0.0883127	-1.24338	Thioredoxin H-type n=5 Tax=Triticeae RepID=TRXH_WHEAT	cDNA expressed protein	ATTRX5; oxidoreductase, acting on sulfur group of donors, disulfide as acceptor
TRX-H5	Ta.30730.1.S1_at	-0.233525	0.00692206	-1.1757	-0.345551	0.00288389	-1.27064	-0.112026	0.111743	-1.08075	-0.484998	0.0011227	-1.39958	-0.729474	0.000802144	-1.65803	-0.244477	0.011519	-1.18466	-0.0178893	0.798321	-1.01248	-0.269362	0.0013949	-1.20528	-0.401813	0.00461407	-1.32117	-0.230273	0.141409	-1.17306	Thioredoxin H-type n=5 Tax=Triticeae RepID=TRXH_WHEAT	cDNA expressed protein	ATTRX5; oxidoreductase, acting on sulfur group of donors, disulfide as acceptor
TRX-H3	Ta.27204.1.S1_at	-0.369703	0.105028	-1.29209	-0.40559	0.0753703	-1.32463	-0.0358869	0.828519	-1.02519	-0.501814	0.00365821	-1.41599	-0.466256	0.000128767	-1.38152	0.0355579	0.675295	1.02495	-0.0784786	0.598097	-1.0559	-0.210589	0.203862	-1.15716	-0.139145	0.256014	-1.10125	0.0189359	0.525042	1.01321	Thioredoxin H-type n=2 Tax=Zea mays RepID=B6T2J0_MAIZE	cDNA expressed protein	ATTRX3 (THIOREDOXIN 3); oxidoreductase, acting on sulfur group of donors, disulfide as acceptor
TRX-H3	Ta.26879.1.A1_at	-0.378042	0.00366491	-1.29958	-0.291602	0.0155407	-1.224	0.08644	0.297984	1.06175	-0.545556	0.00378714	-1.45958	-0.555654	0.00255285	-1.46984	-0.0100979	0.922292	-1.00702	-0.0465893	0.533049	-1.03282	-0.214104	0.0666847	-1.15998	-0.310642	0.0223282	-1.24026	-0.138218	0.306528	-1.10055	Thioredoxin H-type n=3 Tax=Oryza sativa RepID=TRXH_ORYSJ	cDNA thioredoxin, putative, expressed	ATTRX1; oxidoreductase, acting on sulfur group of donors, disulfide as acceptor
MOS3	TaAffx.20369.1.S1_at	0.566211	0.0502356	1.48063	0.53245	0.0824224	1.44638	-0.0337614	0.838569	-1.02368	0.351728	0.432397	1.27609	0.30637	0.517716	1.23659	-0.0453578	0.816587	-1.03194	-0.00824254	0.985948	-1.00573	-0.222726	0.0997191	-1.16694	-0.234322	0.33957	-1.17635	0.443627	0.0837888	1.36002	Os03g0172000 protein n=3 Tax=Oryza sativa RepID=Q10R44_ORYSJ	cDNA OsNucAP1 - Putative Nucleoporin Autopeptidase homologue, expressed	SAR3 (SUPPRESSOR OF AUXIN RESISTANCE 3); porin
MOS3	TaAffx.12489.1.S1_at	0.968297	0.106833	1.95653	-0.094873	0.852962	-1.06797	-1.06317	0.0088081	-2.08952	1.54524	0.0362544	2.91852	0.605742	0.365874	1.52176	-0.939496	0.0530725	-1.91786	-0.642178	0.388196	-1.56068	-0.0652377	0.706174	-1.04626	0.0584364	0.884705	1.04134	1.21943	0.0551408	2.32855	Os03g0172000 protein n=3 Tax=Oryza sativa RepID=Q10R44_ORYSJ	cDNA OsNucAP1 - Putative Nucleoporin Autopeptidase homologue, expressed	SAR3 (SUPPRESSOR OF AUXIN RESISTANCE 3); porin
MOS6	TaAffx.112914.1.S1_at	0.0670329	0.695022	1.04756	0.0283055	0.834918	1.01981	-0.0387274	0.813347	-1.02721	-0.0202411	0.820051	-1.01413	0.122244	0.413466	1.08843	0.142485	0.374562	1.1038	-0.0316516	0.780043	-1.02218	-0.118926	0.457962	-1.08593	0.062287	0.702031	1.04412	0.167398	0.295376	1.12303	Putative uncharacterized protein n=1 Tax=Zea mays RepID=B4FWY8_MAIZE	cDNA importin subunit alpha, putative, expressed	IMPA-1 (IMPORTIN ALPHA ISOFORM 1); binding / protein transporter
MOS6	Ta.28018.1.S1_at	0.554008	0.000436582	1.46816	0.295848	0.0115427	1.22761	-0.25816	0.0081182	-1.19595	0.32106	0.173847	1.24925	0.345737	0.146207	1.2708	0.0246762	0.512916	1.01725	0.00131031	0.995019	1.00091	-0.231637	0.00407125	-1.17417	0.0511991	0.358922	1.03613	0.363183	0.00027394	1.28626	Importin subunit alpha-1a n=3 Tax=Oryza sativa RepID=IMA1A_ORYSJ	cDNA importin subunit alpha, putative, expressed	IMPA-2 (IMPORTIN ALPHA ISOFORM 2); binding / protein transporter
MOS6	TaAffx.55901.1.S1_at	-0.400583	0.00970156	-1.32004	-0.438011	0.0326042	-1.35474	-0.0374275	0.775315	-1.02628	-0.48391	0.0181795	-1.39853	-0.238554	0.109713	-1.17981	0.245356	0.0248613	1.18538	-0.121007	0.414565	-1.08749	-0.204335	0.0506758	-1.15216	0.0784488	0.5498	1.05588	-0.0180359	0.86542	-1.01258	Importin subunit alpha-1a n=3 Tax=Oryza sativa RepID=IMA1A_ORYSJ	cDNA importin subunit alpha, putative, expressed	IMPA-2 (IMPORTIN ALPHA ISOFORM 2); binding / protein transporter
MOS6	Ta.14200.1.S1_at	0.558508	0.00277908	1.47274	0.207311	0.107831	1.15453	-0.351197	0.00281921	-1.27562	0.569197	0.0909037	1.4837	0.409383	0.186078	1.32812	-0.159814	0.0569009	-1.11714	-0.243639	0.413206	-1.18397	-0.23295	0.00548273	-1.17524	-0.0415672	0.576684	-1.02923	0.487516	0.0393485	1.40203	Importin subunit alpha-1b n=4 Tax=Poaceae RepID=IMA1B_ORYSJ	cDNA importin subunit alpha, putative, expressed	IMPA-2 (IMPORTIN ALPHA ISOFORM 2); binding / protein transporter
MOS6	TaAffx.25294.1.S1_s_at	0.527488	0.0339979	1.44142	-0.204174	0.307378	-1.15203	-0.731662	0.000586791	-1.66055	1.01864	0.0481979	2.02601	0.601395	0.187651	1.51718	-0.417245	0.0309175	-1.33537	-0.629883	0.185557	-1.54744	-0.13873	0.0741956	-1.10094	0.175686	0.265652	1.1295	0.788713	0.0580527	1.72753	Importin subunit alpha-1b n=4 Tax=Poaceae RepID=IMA1B_ORYSJ	cDNA importin subunit alpha, putative, expressed	IMPA-2 (IMPORTIN ALPHA ISOFORM 2); binding / protein transporter
NPR	Ta.26307.1.A1_at	0.679579	0.00237168	1.60167	0.342679	0.00639195	1.26811	-0.3369	0.0355486	-1.26304	0.88515	0.00126817	1.84696	0.715387	0.00655505	1.64192	-0.169763	0.141546	-1.12487	0.208781	0.134046	1.15571	0.414352	0.0129129	1.3327	0.581489	0.00508128	1.49639	0.0410036	0.702966	1.02883	Os01g0948900 protein n=4 Tax=Poaceae RepID=Q0JG18_ORYSJ	cDNA BTBR3 - Bric-a-Brac,Tramtrack, Broad Complex BTB domain with Ankyrin repeat region, expressed	BOP2 (BLADE ON PETIOLE2); protein binding
NPR	Ta.27304.1.S1_at	0.274324	0.0855618	1.20943	0.0901061	0.500205	1.06445	-0.184218	0.193319	-1.1362	-0.0554586	0.522509	-1.03919	-0.655624	0.00185947	-1.5753	-0.600166	0.000830652	-1.51589	0.309156	0.0516983	1.23898	-0.020627	0.830618	-1.0144	-0.436575	0.012329	-1.35339	-0.240481	0.173985	-1.18139	Putative uncharacterized protein n=1 Tax=Zea mays RepID=C0HES7_MAIZE	cDNA BTBR2 - Bric-a-Brac,Tramtrack, Broad Complex BTB domain with Ankyrin repeat region, expressed	NPR3 (NPR1-LIKE PROTEIN 3); protein binding
NPR	Ta.7993.1.A1_at	0.502993	0.0278875	1.41715	1.20983	0.000171218	2.3131	0.706836	0.0114325	1.63222	0.808637	0.000272182	1.75156	1.04398	0.000841805	2.06191	0.235343	0.0755234	1.17719	0.0227327	0.791166	1.01588	0.328377	0.0822682	1.2556	-0.143116	0.30678	-1.10429	0.0260925	0.83206	1.01825	NPR1-like 1 protein n=1 Tax=Hordeum vulgare RepID=Q0W9E9_HORVU	cDNA BTBR1 - Bric-a-Brac,Tramtrack, Broad Complex BTB domain with Ankyrin repeat region, expressed	NPR1 (NONEXPRESSER OF PR GENES 1); protein binding / transcription activator
NPR	TaAffx.12271.1.S1_at	0.970184	0.00357736	1.95909	0.669505	0.0482598	1.59053	-0.30068	0.172453	-1.23172	1.0674	0.00270149	2.09565	-0.343547	0.254902	-1.26887	-1.41095	0.00224882	-2.65911	0.150746	0.538366	1.11014	0.247961	0.000719308	1.18753	-0.862305	0.0333997	-1.81794	-0.427015	0.149908	-1.34445	Ankyrin-like protein n=6 Tax=Poaceae RepID=Q5QMH5_ORYSJ	cDNA ankyrin repeat-containing protein, putative, expressed	protein binding
NPR	TaAffx.12271.2.S1_at	1.02818	2.77767e-06	2.03945	0.398997	0.0444742	1.31859	-0.629184	0.0101402	-1.54669	0.953238	0.00685269	1.93621	-0.512888	0.126098	-1.4269	-1.46613	0.00161963	-2.76279	-0.0937836	0.63995	-1.06716	-0.168726	0.00428935	-1.12407	-1.00567	0.0129006	-2.00787	-0.381346	0.133837	-1.30256	Whole genome shotgun sequence of line PN40024, scaffold_40.assembly12x (Fragment) n=1 Tax=Vitis vinifera RepID=D1IH57_VITVI	cDNA ankyrin repeat-containing protein, putative, expressed	ITN1 (INCREASED TOLERANCE TO NACL); protein binding
NPR	TaAffx.80253.1.S1_at	0.20451	0.128633	1.1523	-0.190719	0.122293	-1.14133	-0.395229	0.0481109	-1.31515	-0.0907247	0.380603	-1.0649	-0.600896	0.00752331	-1.51666	-0.510172	0.00354387	-1.42422	0.0375717	0.707238	1.02639	-0.257663	0.0722566	-1.19554	-0.372606	0.0395623	-1.29469	-0.265689	0.0880406	-1.20221
NPR	TaAffx.78372.1.S1_at	1.2078	0.000170966	2.30985	0.241563	0.0499708	1.18227	-0.966236	0.000102481	-1.95374	1.28277	0.00644638	2.43305	0.0246439	0.928272	1.01723	-1.25812	0.000159217	-2.39184	-0.00540698	0.984091	-1.00375	0.0695607	0.302197	1.0494	-0.222326	0.0762909	-1.16661	0.0616267	0.519352	1.04364	Putative uncharacterized protein Sb01g012450 n=1 Tax=Sorghum bicolor RepID=C5WQB3_SORBI	cDNA BTBR4 - Bric-a-Brac,Tramtrack, Broad Complex BTB domain with Ankyrin repeat region, expressed	NPR3 (NPR1-LIKE PROTEIN 3); protein binding
TGA	Ta.5410.1.S1_at	0.500517	0.00564284	1.41472	0.321883	0.00739542	1.24996	-0.178635	0.0597743	-1.13181	0.381424	0.00306339	1.30263	-0.211521	0.421562	-1.15791	-0.592946	0.0620813	-1.50832	0.282833	0.0281483	1.21658	0.163741	0.0824059	1.12019	-0.250571	0.337432	-1.18968	0.102474	0.68685	1.07361	Os07g0687700 protein n=9 Tax=Poaceae RepID=Q7X993_ORYSJ	cDNA transcription factor HBP-1b, putative, expressed	AHBP-1B; DNA binding / transcription activator/ transcription factor/ transcription repressor
TGA	Ta.5410.2.S1_a_at	0.687884	0.00232022	1.61092	0.15109	0.130263	1.11041	-0.536794	0.00632721	-1.45074	0.837816	0.00190349	1.78734	-0.0724361	0.753987	-1.05149	-0.910252	0.00809691	-1.87937	0.0742386	0.583166	1.0528	0.224171	0.0633791	1.16811	-0.149287	0.483138	-1.10902	0.0108402	0.959145	1.00754	Os07g0687700 protein n=9 Tax=Poaceae RepID=Q7X993_ORYSJ	cDNA transcription factor HBP-1b, putative, expressed	AHBP-1B; DNA binding / transcription activator/ transcription factor/ transcription repressor
TGA	Ta.8200.1.S1_at	0.177659	0.186788	1.13105	0.141062	0.232286	1.10272	-0.0365966	0.53158	-1.02569	0.442281	0.000371228	1.35875	-0.00170225	0.968416	-1.00118	-0.443984	9.5581e-05	-1.36035	0.100679	0.39219	1.07228	0.365302	0.00264022	1.28815	-0.0420849	0.174664	-1.0296	0.254758	0.000538687	1.19314	Os07g0687700 protein n=9 Tax=Poaceae RepID=Q7X993_ORYSJ	cDNA transcription factor HBP-1b, putative, expressed	AHBP-1B; DNA binding / transcription activator/ transcription factor/ transcription repressor
TGA	Ta.23670.1.A1_at	0.614944	0.00343515	1.5315	0.00727472	0.910409	1.00506	-0.607669	0.00236381	-1.5238	0.289175	0.197087	1.22194	-0.285043	0.242152	-1.21845	-0.574218	0.00933203	-1.48887	0.20078	0.340297	1.14932	-0.124988	0.286941	-1.0905	-0.0915369	0.457668	-1.0655	-0.0875271	0.482515	-1.06255	Transcription factor HBP-1b(c1) (Fragment) n=1 Tax=Triticum aestivum RepID=HBP1C_WHEAT	cDNA transcription factor, putative, expressed	AHBP-1B; DNA binding / transcription activator/ transcription factor/ transcription repressor
TGA	Ta.23670.1.S1_at	1.55964	0.00143013	2.94781	0.739892	0.0129131	1.67005	-0.819751	0.0260619	-1.7651	1.74649	0.000878317	3.35542	1.13572	0.00448261	2.19729	-0.610772	0.00170711	-1.52708	-0.131112	0.556319	-1.09514	0.0557396	0.784166	1.03939	0.264719	0.181939	1.2014	0.2096	0.170894	1.15637	Transcription factor HBP-1b(c1) (Fragment) n=1 Tax=Triticum aestivum RepID=HBP1C_WHEAT	cDNA transcription factor, putative, expressed	AHBP-1B; DNA binding / transcription activator/ transcription factor/ transcription repressor
TGA	TaAffx.88821.1.S1_at	0.269767	0.461715	1.20561	-0.187623	0.588058	-1.13889	-0.45739	0.0125735	-1.37306	0.974352	1.07665e-05	1.96476	0.119423	0.587033	1.0863	-0.85493	0.0137179	-1.80867	-0.260547	0.45767	-1.19793	0.444039	0.0126076	1.36041	0.0464992	0.831838	1.03276	0.588236	0.118052	1.50341	Os07g0687700 protein n=9 Tax=Poaceae RepID=Q7X993_ORYSJ	cDNA transcription factor, putative, expressed	AHBP-1B; DNA binding / transcription activator/ transcription factor/ transcription repressor
TGA	Ta.808.1.S1_at	-0.207008	0.00042574	-1.15429	-0.439754	0.000161128	-1.35637	-0.232747	0.00122326	-1.17507	0.421828	0.000626647	1.33962	0.369604	0.00158828	1.292	-0.0522243	0.0840865	-1.03686	-0.195243	0.0135239	-1.14492	0.433592	2.00522e-06	1.35059	0.614115	6.18861e-05	1.53062	0.252468	0.033106	1.19124	Transcription factor HBP-1b(c38) n=4 Tax=Poaceae RepID=HBP1B_WHEAT	cDNA transcription factor, putative, expressed	AHBP-1B; DNA binding / transcription activator/ transcription factor/ transcription repressor
TGA	Ta.3015.1.A1_at	1.28887	0.0064717	2.44337	2.05258	0.00142091	4.14847	0.763707	0.00274156	1.69785	1.82937	7.2861e-05	3.55383	2.61168	3.70986e-05	6.11217	0.782309	0.00525744	1.71988	-0.0451727	0.865357	-1.03181	0.495329	0.00848739	1.40964	0.513932	0.0274963	1.42794	0.136497	0.401338	1.09923	Putative uncharacterized protein n=2 Tax=Zea mays RepID=C4JBE8_MAIZE	cDNA transcription factor, putative, expressed	TGA4 (TGACG MOTIF-BINDING FACTOR 4); DNA binding / calmodulin binding / transcription factor
SNI	Ta.10251.2.S1_at	-0.237392	0.0198718	-1.17886	-0.402373	0.00434785	-1.32168	-0.164981	0.0080469	-1.12115	-0.0582793	0.502258	-1.04122	-0.158592	0.0748817	-1.1162	-0.100313	0.294787	-1.07201	-0.289233	0.0185066	-1.22199	-0.11012	0.178908	-1.07932	-0.0454523	0.484749	-1.03201	0.0558858	0.477046	1.0395	CBL-interacting protein kinase 30 n=3 Tax=Oryza sativa RepID=CIPKU_ORYSJ	cDNA CAMK_KIN1/SNF1/Nim1_like.1 - CAMK includes calcium/calmodulin depedent protein kinases, expressed	CIPK12 (CBL-INTERACTING PROTEIN KINASE 12); ATP binding / kinase/ protein kinase/ protein serine/threonine kinase
SNI	Ta.144.1.S1_s_at	-0.197925	0.207462	-1.14705	-0.33824	0.105476	-1.26421	-0.140315	0.250963	-1.10215	-0.658997	0.111171	-1.57898	-0.764148	0.147207	-1.69837	-0.105151	0.736975	-1.07561	0.195482	0.597777	1.14511	-0.26559	0.021199	-1.20213	-0.230427	0.487526	-1.17318	0.577624	0.146163	1.49239	Wpk4 protein kinase n=1 Tax=Triticum aestivum RepID=Q41592_WHEAT	cDNA CAMK_KIN1/SNF1/Nim1_like.25 - CAMK includes calcium/calmodulin depedent protein kinases, expressed	CIPK12 (CBL-INTERACTING PROTEIN KINASE 12); ATP binding / kinase/ protein kinase/ protein serine/threonine kinase
SNI	Ta.10097.1.S1_at	0.577864	0.00187655	1.49264	0.323834	0.0122016	1.25165	-0.254031	0.0119104	-1.19253	1.97806	0.000310453	3.93964	1.69101	0.000205366	3.22883	-0.287053	0.0741626	-1.22015	-0.295775	0.104901	-1.22754	1.10443	0.00084504	2.15013	1.0714	2.97816e-05	2.10148	-0.0833537	0.637793	-1.05948	Putative uncharacterized protein n=2 Tax=Oryza sativa RepID=A3BCJ1_ORYSJ	cDNA CAMK_KIN1/SNF1/Nim1_like.26 - CAMK includes calcium/calmodulin depedent protein kinases, expressed	CIPK12 (CBL-INTERACTING PROTEIN KINASE 12); ATP binding / kinase/ protein kinase/ protein serine/threonine kinase
SNI	Ta.10097.1.S1_x_at	0.640871	8.32558e-06	1.55927	0.451231	0.00130857	1.36721	-0.18964	0.0304242	-1.14048	1.92368	0.00139874	3.79389	1.7131	0.00236222	3.27865	-0.210579	0.206948	-1.15715	-0.192183	0.443876	-1.14249	1.09062	0.000307413	2.12966	1.06968	0.000853645	2.09898	-0.0569983	0.821077	-1.0403	Putative uncharacterized protein n=2 Tax=Oryza sativa RepID=A3BCJ1_ORYSJ	cDNA CAMK_KIN1/SNF1/Nim1_like.26 - CAMK includes calcium/calmodulin depedent protein kinases, expressed	CIPK12 (CBL-INTERACTING PROTEIN KINASE 12); ATP binding / kinase/ protein kinase/ protein serine/threonine kinase
SNI	Ta.10251.1.A1_at	0.061521	0.349224	1.04357	-0.249331	0.0401634	-1.18866	-0.310852	0.0369396	-1.24044	-0.0517816	0.65202	-1.03654	-0.143439	0.067599	-1.10454	-0.0916579	0.431322	-1.06559	0.0359841	0.454144	1.02526	-0.0773185	0.53205	-1.05506	0.141876	0.195851	1.10334	0.0443695	0.47365	1.03123	Putative uncharacterized protein n=1 Tax=Oryza sativa Indica Group RepID=A2WVA0_ORYSI	cDNA CAMK_KIN1/SNF1/Nim1_like.1 - CAMK includes calcium/calmodulin depedent protein kinases, expressed	SIP1 (SOS3-INTERACTING PROTEIN 1); ATP binding / kinase/ protein kinase/ protein serine/threonine kinase
SNI	TaAffx.23939.1.S1_x_at	0.0249648	0.861229	1.01745	-0.36386	0.0783091	-1.28686	-0.388825	0.0138489	-1.30933	-0.112794	0.162351	-1.08132	-0.544787	0.002138	-1.4588	-0.431993	0.00401667	-1.3491	0.0498563	0.736814	1.03516	-0.0879028	0.192352	-1.06282	-0.13107	0.274979	-1.09511	-0.139192	0.158097	-1.10129	Wpk4 protein kinase n=1 Tax=Triticum aestivum RepID=Q41592_WHEAT	cDNA CAMK_KIN1/SNF1/Nim1_like.11 - CAMK includes calcium/calmodulin depedent protein kinases, expressed	CIPK19 (CBL-INTERACTING PROTEIN KINASE 19); ATP binding / kinase/ protein kinase/ protein serine/threonine kinase
SNI	TaAffx.121170.1.S1_at	1.50594	0.000102356	2.84011	0.202651	0.112002	1.15081	-1.30329	0.000521781	-2.46792	1.87372	0.00153342	3.66476	0.43761	0.158635	1.35436	-1.43611	3.35374e-05	-2.7059	-0.0759981	0.773145	-1.05409	0.291776	0.0313604	1.22415	0.15896	0.238753	1.11648	-0.255772	0.187186	-1.19397	CBL-interacting protein kinase 7 n=3 Tax=Oryza sativa RepID=CIPK7_ORYSJ	cDNA CAMK_KIN1/SNF1/Nim1_like.17 - CAMK includes calcium/calmodulin depedent protein kinases, expressed	CIPK5 (CBL-INTERACTING PROTEIN KINASE 5); ATP binding / kinase/ protein kinase/ protein serine/threonine kinase
SNI	Ta.28384.1.S1_s_at	0.240928	0.0503045	1.18175	-0.772273	0.00392601	-1.70796	-1.0132	0.0020326	-2.01838	-0.316074	0.135738	-1.24494	-0.899504	0.0094155	-1.86543	-0.58343	0.00421397	-1.49841	0.089877	0.630755	1.06428	-0.467125	0.00427868	-1.38235	-0.0373549	0.819917	-1.02623	-0.167187	0.484424	-1.12287	Putative uncharacterized protein n=1 Tax=Oryza sativa Japonica Group RepID=B9FL42_ORYSJ	cDNA CAMK_KIN1/SNF1/Nim1_like.25 - CAMK includes calcium/calmodulin depedent protein kinases, expressed	CIPK18 (CBL-INTERACTING PROTEIN KINASE 18); ATP binding / kinase/ protein kinase/ protein serine/threonine kinase
SNI	Ta.5838.1.A1_at	0.494711	0.00202046	1.40904	-0.705931	0.0212215	-1.6312	-1.20064	0.00321271	-2.29842	-0.316728	0.00319773	-1.2455	-1.03808	0.00159404	-2.05349	-0.721352	0.00554485	-1.64873	0.224109	0.0286302	1.16806	-0.58733	0.000376998	-1.50246	-0.10804	0.657042	-1.07776	-0.214937	0.403205	-1.16065	Putative uncharacterized protein n=1 Tax=Oryza sativa Japonica Group RepID=B9FL42_ORYSJ	cDNA CAMK_KIN1/SNF1/Nim1_like.25 - CAMK includes calcium/calmodulin depedent protein kinases, expressed	CIPK18 (CBL-INTERACTING PROTEIN KINASE 18); ATP binding / kinase/ protein kinase/ protein serine/threonine kinase
SNI	Ta.28384.1.S1_at	0.559503	0.0210521	1.47376	-0.661682	0.0486254	-1.58193	-1.22118	0.00467654	-2.33138	-0.389617	0.00755681	-1.31005	-0.984973	0.000837112	-1.97928	-0.595355	0.00217768	-1.51084	0.246311	0.170821	1.18617	-0.702809	0.00118651	-1.62767	-0.0769795	0.73724	-1.05481	-0.120636	0.485659	-1.08721	Putative uncharacterized protein n=1 Tax=Oryza sativa Japonica Group RepID=B9FL42_ORYSJ	cDNA CAMK_KIN1/SNF1/Nim1_like.25 - CAMK includes calcium/calmodulin depedent protein kinases, expressed	CIPK18 (CBL-INTERACTING PROTEIN KINASE 18); ATP binding / kinase/ protein kinase/ protein serine/threonine kinase
SNI	Ta.9542.1.S1_x_at	-0.175603	0.185631	-1.12944	-0.600356	0.00379992	-1.51609	-0.424752	0.0136741	-1.34234	1.22408	0.00362794	2.33607	0.738958	0.0676122	1.66897	-0.485126	0.0951743	-1.39971	-0.391755	0.139136	-1.31199	1.00793	0.000273851	2.01103	0.947559	0.0146159	1.92861	0.539549	0.0740671	1.45352	CBL-interacting protein kinase n=1 Tax=Hordeum brevisubulatum RepID=A5HLX6_9POAL	cDNA CAMK_KIN1/SNF1/Nim1_like.31 - CAMK includes calcium/calmodulin depedent protein kinases, expressed	SIP1 (SOS3-INTERACTING PROTEIN 1); ATP binding / kinase/ protein kinase/ protein serine/threonine kinase
SNI	TaAffx.112167.1.S1_at	0.0213646	0.907796	1.01492	-0.47789	0.00439883	-1.39271	-0.499254	0.0387451	-1.41348	0.0128842	0.869434	1.00897	-0.0692142	0.480803	-1.04914	-0.0820984	0.473935	-1.05856	-0.034216	0.684083	-1.024	-0.0426964	0.815347	-1.03004	0.37446	0.0157263	1.29635	0.140615	0.248055	1.10238	CBL-interacting protein kinase 25 n=1 Tax=Sorghum bicolor RepID=C4P7S7_SORBI	cDNA CAMK_KIN1/SNF1/Nim1_like.31 - CAMK includes calcium/calmodulin depedent protein kinases, expressed	CIPK2 (CBL-INTERACTING PROTEIN KINASE 2); ATP binding / kinase/ protein kinase/ protein serine/threonine kinase
SNI	Ta.9542.2.S1_x_at	-0.25468	0.0253342	-1.19307	-0.515884	0.00472991	-1.42987	-0.261205	0.0506921	-1.19848	0.887324	0.00790923	1.84974	0.578443	0.0879821	1.49324	-0.308881	0.172245	-1.23875	-0.201347	0.338735	-1.14977	0.940656	8.77931e-05	1.9194	0.89298	0.0111805	1.85701	0.590185	0.0498781	1.50544	CBL-interacting protein kinase n=1 Tax=Hordeum brevisubulatum RepID=A5HLX6_9POAL	cDNA CAMK_KIN1/SNF1/Nim1_like.31 - CAMK includes calcium/calmodulin depedent protein kinases, expressed	CIPK2 (CBL-INTERACTING PROTEIN KINASE 2); ATP binding / kinase/ protein kinase/ protein serine/threonine kinase
SNI	Ta.9542.3.S1_at	0.194946	0.316759	1.14468	-0.312153	0.0606498	-1.24156	-0.507099	0.0684281	-1.42119	-0.171495	0.105174	-1.12623	-0.690468	0.00179166	-1.61381	-0.518973	0.00335663	-1.43294	0.0666185	0.405217	1.04726	-0.299822	0.162213	-1.23099	-0.311696	0.081552	-1.24117	-0.175004	0.0707427	-1.12897	CBL-interacting protein kinase 16 n=2 Tax=Vitis vinifera RepID=C4P7W5_VITVI	cDNA CAMK_KIN1/SNF1/Nim1_like.31 - CAMK includes calcium/calmodulin depedent protein kinases, expressed	CIPK25 (CBL-INTERACTING PROTEIN KINASE 25); ATP binding / kinase/ protein kinase/ protein serine/threonine kinase
SNI	Ta.18735.1.S1_at	4.00575	3.78468e-05	16.0639	3.49029	9.10348e-05	11.2378	-0.515467	0.00440825	-1.42946	3.92516	3.91149e-06	15.1912	3.40209	3.14523e-05	10.5714	-0.523077	0.016229	-1.43702	0.338634	0.209596	1.26456	0.258047	0.00334355	1.19586	0.250436	0.176723	1.18957	-0.352881	0.0766247	-1.27711	CBL-interacting protein kinase 22 n=3 Tax=Andropogoneae RepID=C4P7T7_SORBI	cDNA CAMK_KIN1/SNF1/Nim1_like.33 - CAMK includes calcium/calmodulin depedent protein kinases, expressed	CIPK20 (CBL-INTERACTING PROTEIN KINASE 20); kinase/ protein serine/threonine kinase
SNI	Ta.25921.1.A1_at	2.49238	6.10751e-08	5.62706	1.78263	1.6524e-05	3.44054	-0.709748	0.000662803	-1.63552	2.58228	0.000134252	5.98886	1.56764	0.000970873	2.96419	-1.01465	9.68212e-05	-2.02041	-0.040793	0.826693	-1.02868	0.049106	0.354642	1.03462	-0.255791	0.0416015	-1.19399	-0.329015	0.0491496	-1.25615	Putative uncharacterized protein n=1 Tax=Oryza sativa Japonica Group RepID=A3BYW1_ORYSJ	cDNA CAMK_KIN1/SNF1/Nim1_like.34 - CAMK includes calcium/calmodulin depedent protein kinases, expressed	CIPK5 (CBL-INTERACTING PROTEIN KINASE 5); ATP binding / kinase/ protein kinase/ protein serine/threonine kinase
SNI	Ta.8465.1.S1_at	4.11968	1.22251e-05	17.3838	3.30521	6.15795e-05	9.88476	-0.81447	0.00199852	-1.75865	3.66022	8.19495e-06	12.6426	3.23649	0.000111579	9.42495	-0.423738	0.0901098	-1.3414	0.37554	0.119104	1.29733	-0.0839138	0.255534	-1.05989	0.306819	0.222247	1.23698	-0.392889	0.143899	-1.31302	CBL-interacting protein kinase 14 n=2 Tax=Andropogoneae RepID=C4P7S4_SORBI	cDNA CAMK_KIN1/SNF1/Nim1_like.35 - CAMK includes calcium/calmodulin depedent protein kinases, expressed	SIP3 (SOS3-INTERACTING PROTEIN 3); ATP binding / kinase/ protein kinase/ protein serine/threonine kinase
SNI	Ta.8400.2.S1_at	-0.251872	0.067295	-1.19075	-0.502263	0.0269846	-1.41643	-0.250391	0.104137	-1.18953	-0.386783	0.0694053	-1.30747	-0.399352	0.0631082	-1.31892	-0.0125689	0.886092	-1.00875	0.0285521	0.877002	1.01999	-0.106358	0.202682	-1.07651	0.131463	0.359643	1.0954	-0.083102	0.44245	-1.05929	CBL-interacting protein kinase 5 n=3 Tax=Oryza sativa RepID=CIPK5_ORYSJ	cDNA CAMK_KIN1/SNF1/Nim1_like.8 - CAMK includes calcium/calmodulin depedent protein kinases, expressed	CIPK20 (CBL-INTERACTING PROTEIN KINASE 20); kinase/ protein serine/threonine kinase
SNI	Ta.8400.1.A1_at	0.0522786	0.495611	1.0369	-0.154727	0.369924	-1.11321	-0.207006	0.252279	-1.15429	0.235469	0.0749737	1.17729	-0.156583	0.163368	-1.11464	-0.392052	0.00689064	-1.31226	-0.20855	0.0842439	-1.15553	-0.0253594	0.76422	-1.01773	-0.210405	0.242741	-1.15701	-0.0526514	0.704201	-1.03717	CBL-interacting protein kinase 5 n=3 Tax=Oryza sativa RepID=CIPK5_ORYSJ	cDNA CAMK_KIN1/SNF1/Nim1_like.8 - CAMK includes calcium/calmodulin depedent protein kinases, expressed	CIPK20 (CBL-INTERACTING PROTEIN KINASE 20); kinase/ protein serine/threonine kinase
SNI	TaAffx.110543.1.S1_x_at	-0.00888384	0.906522	-1.00618	0.0872293	0.36787	1.06233	0.0961132	0.142044	1.06889	-0.134864	0.158921	-1.09799	0.0140043	0.894509	1.00975	0.148869	0.137765	1.1087	0.0956129	0.383551	1.06852	-0.0303676	0.486369	-1.02127	0.0223879	0.810811	1.01564	0.0764592	0.508346	1.05443	CBL-interacting protein kinase 5 n=3 Tax=Oryza sativa RepID=CIPK5_ORYSJ	cDNA CAMK_KIN1/SNF1/Nim1_like.8 - CAMK includes calcium/calmodulin depedent protein kinases, expressed	CIPK20 (CBL-INTERACTING PROTEIN KINASE 20); kinase/ protein serine/threonine kinase
WHY1	Ta.1371.1.S1_a_at	0.822202	0.0061526	1.7681	0.672846	0.0118679	1.59421	-0.149356	0.360988	-1.10907	1.11085	1.18313e-05	2.15973	1.81415	0.00042486	3.51652	0.703298	0.0135917	1.62822	0.0547005	0.673792	1.03864	0.343349	0.0323833	1.2687	1.196	0.00349526	2.29104	0.497206	0.0435383	1.41148	Expressed protein n=1 Tax=Brachypodium sylvaticum RepID=A1YKH2_BRASY	cDNA whirly transcription factor domain containing protein, expressed	WHY3 (WHIRLY 3); DNA binding
WRKY	Ta.8348.1.A1_x_at	-0.189423	0.102712	-1.14031	-0.29726	0.038845	-1.22881	-0.107837	0.0632193	-1.07761	0.78817	8.68139e-05	1.72688	-0.106786	0.344278	-1.07683	-0.894956	0.000642975	-1.85955	-0.0946638	0.393763	-1.06782	0.88293	3.9826e-06	1.84412	0.0958105	0.386542	1.06867	-0.127611	0.378739	-1.09248	WRKY27 transcription factor n=1 Tax=Triticum aestivum RepID=B3GAU9_WHEAT	cDNA OsWRKY24 - Superfamily of TFs having WRKY and zinc finger domains, expressed
WRKY	TaAffx.82869.1.S1_at	-0.558788	0.00547099	-1.47303	-0.262066	0.0865427	-1.1992	0.296721	0.0956022	1.22835	-0.492506	0.0018394	-1.40689	-0.658219	0.0185466	-1.57813	-0.165713	0.363312	-1.12172	0.106659	0.257591	1.07673	0.172941	0.132995	1.12735	-0.289493	0.203564	-1.22221	-0.309774	0.137095	-1.23951	Os01g0826400 protein n=2 Tax=Oryza sativa RepID=Q6IEQ7_ORYSJ	cDNA OsWRKY24 - Superfamily of TFs having WRKY and zinc finger domains, expressed
WRKY	Ta.29394.1.S1_at	0.224104	0.588917	1.16805	-1.01323	0.0578208	-2.01843	-1.23733	0.000893083	-2.35762	0.854569	0.000202648	1.80822	-0.725161	0.0233605	-1.65308	-1.57973	0.00165722	-2.98914	-0.463257	0.280306	-1.37865	0.167208	0.206148	1.12288	-0.175189	0.481458	-1.12911	0.0788685	0.788463	1.05619	WRKY transcription factor 42 (Fragment) n=1 Tax=Hordeum vulgare subsp. vulgare RepID=B2KJ82_HORVD	cDNA OsWRKY30 - Superfamily of TFs having WRKY and zinc finger domains, expressed	WRKY2; transcription factor
WRKY	TaAffx.107717.1.S1_at	0.191612	0.155891	1.14204	-0.211913	0.213532	-1.15822	-0.403525	0.0436237	-1.32274	0.337355	0.0369661	1.26344	-0.142684	0.132103	-1.10396	-0.480039	0.0046537	-1.39478	-0.14196	0.265182	-1.1034	0.00378263	0.974143	1.00263	-0.0727317	0.57524	-1.05171	-0.0597246	0.493548	-1.04227	WRKY transcription factor 42 (Fragment) n=1 Tax=Hordeum vulgare subsp. vulgare RepID=B2KJ82_HORVD	cDNA OsWRKY80 - Superfamily of TFs having WRKY and zinc finger domains, expressed	WRKY34 (WRKY DNA-BINDING PROTEIN 34); transcription factor
WRKY	Ta.4348.1.A1_at	0.565846	0.0288366	1.48026	0.306914	0.149257	1.23706	-0.258931	0.230154	-1.19659	0.881224	0.00150905	1.84194	0.0793641	0.578933	1.05655	-0.801859	0.000262634	-1.74335	0.0576943	0.735659	1.0408	0.373072	0.0431604	1.29511	-0.169856	0.311758	-1.12495	-0.0678098	0.441846	-1.04812	Mitogen-activated protein kinase 1, putative, expressed n=3 Tax=Oryza sativa RepID=Q10NR1_ORYSJ	cDNA STE_MEKK_ste11_MAP3K.12 - STE kinases include homologs to sterile 7, sterile 11 and sterile 20 from yeast, expr	WRKY19; transcription factor
